# Supplementary material for: Epiplasts: Membrane Skeletons and Epiplastin Proteins in Euglenids, Glaucophytes, Cryptophytes, Ciliates, Dinoflagellates, and Apicomplexans
Source: PubMed Central journal article supplement (PMC6212826; doi:10.1128/mbio.02020-18), 2018-10-30

## Key to Gene Annotations

- **General organization:** The medial acid-base dyads (ABDs) are “parsed” into “strings that initiate with a dyad. N-term domain is denoted the head, C-term the tail.
- **Highlights:** Yellow, tyrosine; Green, cysteine; Pink, VPV; Gray, ABD in predicted head and tail domains.
- **Colored font:** Red, glycine residues in ABD domains; Bold-faced red, last G residue in head and first G residue in tail; Blue, alanine residues in ABD domains; Green, repeated string domains.
- **Underscores:** Acid-base triads or tetrads.
- **Commentary:** Notes on distinctive gene features (e.g. orthologues, localization patterns) in green font at top of some pages. Predicted homology domains (e.g. PDZ, coiled-coil) are given in Supplement Table 2.
- **Secondary structure:** PSIPRED predictions for a subset of proteins. Yellow, amino acids predicted in  $\beta$ -strand; pink, amino acids predicted in  $\alpha$ -helix; no highlight, amino acids predicted in disordered (random coil) domain.

## Articulin

Predicted secondary structure next slide

MSYLAGAPVTAAASYPVVPGAAAYPVGASYPAVAQASVLRANAQFAGQQRVIR

KEVVG<sup>R</sup>NVEY<sup>Y</sup>IPVQHNHEVELIEREFIV<sup>PV</sup>EKIVQRHV<sup>PV</sup>PVERIVQRRV<sup>PV</sup>PRQ<sup>V</sup>PV<sup>P</sup>Q<sup>R</sup>VEIP<sup>V</sup>PVERIQHRQVP<sup>Y</sup>PVEQIVEKRI<sup>P</sup>V<sup>P</sup>TQ<sup>T</sup>VEQ<sup>A</sup>VE<sup>V</sup>PV<sup>P</sup>PV<sup>H</sup>RRVIQ<sup>Q</sup>V<sup>P</sup>P<sup>H</sup>AV<sup>V</sup>REVIRHEP<sup>Y</sup>PVTKEVTRQ<sup>V</sup>P<sup>V</sup>EVPREVVRQVTVD<sup>V</sup>P<sup>V</sup>QVPQH<sup>V</sup>QVP<sup>Y</sup>PVEKVVHRQVP<sup>Y</sup>PVEKVVQRQVP<sup>Y</sup>PVQKIVERQVQVP<sup>Y</sup>EVLVP

ERVEIPVPHEVITH

RD<sup>V</sup>P<sup>V</sup>PQE<sup>V</sup>IRT<sup>V</sup>Q<sup>V</sup>P<sup>V</sup>P<sup>V</sup>EQIV<sup>H</sup>RDVP<sup>Y</sup>PVEQIVEKVVQVTRQVTVPEIVQ<sup>V</sup>P<sup>V</sup>P<sup>H</sup>EVIVERR<sup>V</sup>P<sup>V</sup>P<sup>V</sup>ERITHK<sup>A</sup>VP<sup>Y</sup>PVEQIVEKIVQ<sup>V</sup>P<sup>V</sup>P<sup>Q</sup>Y<sup>Q</sup>K<sup>V</sup>P<sup>V</sup>Q<sup>V</sup>P<sup>V</sup>P<sup>V</sup>

ERIVT

RDVP<sup>Y</sup>PVEQIV

DKVV

ERQ<sup>V</sup>P<sup>V</sup>PT<sup>V</sup>Q<sup>V</sup>P<sup>V</sup>PT<sup>V</sup>Q<sup>V</sup>P<sup>Y</sup>PV

EKIV

DRPVPHEVVRVV

ERRVEVP<sup>Y</sup>D<sup>V</sup>P<sup>V</sup>P<sup>V</sup>VIETVQVPHEVIRTVEVPFPVEQIV

EKIV

EKIVH<sup>V</sup>P<sup>V</sup>P<sup>V</sup>TRQEHVTRQVVQNTLQQTRAPPQQL<sup>G</sup>TQVLPGRDLGVTSGIVRGGPAAYGAYGA

TPVAAAPVTYGSVAAPVTYGAAPVTYGAAPVTAYGAPPVYAGAPAVVTAPSSVT

RYGYGPPRPAYPAT<sup>V</sup>P<sup>V</sup>AYAAAPT<sup>E</sup>LRNDDFDWPPVPSV<sup>C</sup>GVQRQPQ

*Euglena* 80K articulin AAB23240.1

## Predicted secondary structure

```
1 M S Y L A G A P V T A A A S Y P V V P G A A A Y P V G A S Y P A V A Q A S V L R A N A Q F A G Q R V
51 I R K E V V G N V E Y I P V Q H N H E V E L I E R E F I V P V E K I V Q R H V P V P V E R I V Q R R
101 V P V P R Q V P V P Q R V E I P V P V E R I Q H R Q V P Y P V E Q I V E K R I P V P V T Q T V E Q A
151 V E V P V P V H R R V I Q Q V P V P H A V V R E V I R H E P Y P V T K E V T R Q V P V E V P R E V V
201 R Q V T V D V P V Q V P Q H V Q V P Y P V E K V V H R Q V P Y P V E K V V Q R Q V P Y P V Q K I V E
251 R Q V Q V P Y E V L V P E R V E I P V P H E V I T H R D V P V P Q E V I R T V Q V P V P V E Q I V H
301 R D V P Y P V E Q I V E K V V Q V T R Q V T V P E I V Q V P V P H E V I V E R R V P V P V E R I T H
351 K A V P Y P V E Q I V E K I V Q V P V P Q Y Q K V P V Q V P V P V E R I V T R D V P Y P V E Q I V D
401 K V V E R Q V P V P T P V Q V P V P T P V Q V P Y P V E K I V D R P V P H E V V R V V E R R V E V P
451 Y D V P V P V I E T V Q V P H E V I R T V E V P F P V E Q I V E K I V E K I V H V P V P V T R Q E H
501 V T R Q V V Q N T L Q Q T R A P P Q Q L G T Q V L P G R D L G V T S G I V R G G P A A Y G A Y G A T
551 P V A A A P V T Y G S V A A P V T Y G A A A P V T Y G A A P V T A Y G A P P V Y A G A P A V V T A P
601 S S V T R Y G Y G P P R P A Y P A T V P V A Y A A A P T E L R N D D F D W P P V P S V C G V Q R Q P
651 Q
```

## Articulin

Predicted secondary structure next slide

MSWVAAQTQQGAFALDAADGRIDGKYFGSNVGVSVPGAPVTYGAAAPVTSYA  
 APAAVTSFAATAAPVTSFGAYGAYAPACPPCATGPRVVNDPLETRFVDVVKQV  
 ETIRSVDVPVPHEVVRTVDVPEHYDVPVPHAVHVQVPYPV

DKFVDVPVPHTIQKIVETRVPYPVQQVVQRRV  
 ERPYDVPVV  
 ERVNVVPVEQVV  
 ERRVPVPVEQIV  
 ERVQVPV  
 ERLV  
 EKVQVHRQVPVPVRVEVPVPHEVIRTVDVPVPHEVVRTQDVPVPVEQIV  
 EKVQVPVPVQKKVIQHVQVPYPVQKIV  
 DRPVPYPV  
 EKIVEQKVPYAVQKVI  
 DRPVPYPVQKIV  
 ERRVDVPVEVKVRQEVRVPYPVQKIV  
 DRPEPYPV  
 DKVVEVPQYPVPVQKVV  
 ERRVEVPHVIQVREEVRVPYTV  
 DKVV  
 DRPVPYPVT  
 KEVRYV  
 DRPVPQPYEVRVPQPYEVKVPVEQIRY  
 RDVPVPV  
 ERIV  
 EKVQVPVPRQVPVKQIQQVPVPV  
 EKIVHVQRPYPVQKVVV  
 REVVKHVQVPHEIIQRVEHVQHVVQPVEVIEEPVIQQIV

TINKRTIQGQPYVANTTTNVIGQEVRGAYAAGAYGATVTGPAVATGYGQSVTGYGQ  
 SVTGYGYGAAAPVAVAGSQGGALSLDLADGRDLGRFYGAPVVSASPF

## Predicted secondary structure

1 M S W V A A Q T Q Q G A F A L D A A D G R I D G K Y F G S N V G V S V P G A P V T Y G A A A P V T S 5  
51 Y A A P A A V T S F A A T A A P V T S F G A Y G A Y A P A C P P C A T G P R V V N D P L E T R F V D 1  
101 V V K Q V E T I R S V D V P V P H E V V R T V D V P E H Y D V P V P H A V H V Q V P Y P V D K F V D 1  
151 V P V P H T I Q K I V E T R V P Y P V Q Q V V Q R R V E R P Y D V P V V E R V N V P Y P V E Q V V E 2  
201 R R V P V P V E Q I V E R V V Q V P V E R L V E K V V Q V H R Q V P V P V R V E V P V P H E V I R T 2  
251 V D V P V P H E V V R T Q D V P V P V E Q I V E K V V Q V P V P V Q K K V I Q H V Q V P Y P V Q K I 3  
301 V D R P V P Y P V E K I V E Q K V P Y A V Q K V I D R P V P Y P V Q K I V E R R V D V P V E V K V R 3  
351 Q E V R V P Y P V Q K I V D R P E P Y P V D K V V E V P Q P Y P V Q K V V E R R V E V P H V I Q V R 4  
401 E E V R V P Y T V D K V V D R P V P Y P V T K E V V R Y V D R P V P Q P Y E V R V P Q P Y E V K V P 4  
451 V E Q I R Y R D V P V P V E R I V E K V V Q V P V P R Q V P V K Q I Q Q V P V P V E K I V H V Q R P 5  
501 Y P V Q K V V V R E V V K H V Q V P H E I I Q R V E H V Q H V V Q P V E V I E E P V I Q Q I V T I N 5  
551 K R T I Q G Q P Y V A N T T T N V I G Q E V R G A Y A A G A Y G A T V T G P A V A T G Y G Q S V T G 6  
601 Y G Q S V T G Y G Y G A A A P V A V A G S Q G G A L S L D L A D G R L D G R F Y G A P V V S A S P F 6  
651

6

*Euglena* Gene.3890\_GEFR01000334.1  
(First third of sequence)

Articulin. Predicted secondary structure at end of sequence

...FFFELFISTMSKPVTTTSGRVRYDGGSQMRVLGGATSGSASSTPIFVSETSP  
ITTTHYGGSVTRTYGASTVGVGGISSHYVGGTTVAGSSLAGSTRTHAVGGTAIA  
GSSALAGSSLTGSAAFGTGGSVLVGGSALVGGASSVGGASVGGSRVRHIG  
GEGPIYVDSGYTTSGYSNVCCAPAGVRSTFVGSRRREVLEAATVTQHI

EKVPVEIDVDIDTY  
REIVEVPI  
EKIVEVPYPV  
EKIVQVPV  
DRVVEVPV  
ERLV  
ERIVRVPEVRTVEVPVEHC  
EKLVTVPEIL  
EREVAI  
EKIV  
ERVVRVPEIHEIEVPV  
EKLI  
ERILRVPEIHEIEVPV  
ERIV  
EKVIRVPEIRQVEVPV  
ERII  
EKIIRVPEIHEIEVPV  
EKRIETVVRVPEVHQIEVPV  
EKII  
ERVVRVPEVHQIEVPV  
EKIV  
ERVVQTHT  
RDVIEVPV  
EKVV  
ERIVRVPQETLIEVPV  
EKIV  
ERVVRVPQHTTVEVPV  
EKVI  
ERVVQTHT  
RDIIEVPV  
EKVV  
ERVVRVPQETIIEVPV  
EKVV  
ERIVTVPQHTTVEVPV  
EKIV  
ERVVQTHT  
RDVIEVPV  
EKVV  
ERIVKVPQETIIEVPV  
EKLI  
ERVCRVPQETIVEVPV  
EKII  
ERVSQTHV  
RDIVEVPV  
EKLV  
ERIVTVP  
KETVIEVPV  
EKII  
ERIVKVPQETIVEVPV  
EKLV  
ERVQHTHT

*Euglena* Gene.3890\_GEFR01000334.1  
(Second third of sequence)

RDIEVPV  
EKIV  
ERVVKVPQETIIEVPV  
EKVI  
ERVVTVPQETI  
REVPV  
EKVV  
ERVVQTHT  
RDIEVPV  
EKII  
ERVVKVPQETIVEVPV  
ERVI  
EKVSTHT  
RDIEVPI  
EKII  
ERIVKVPQETIIEVPV  
EKI  
ERVVTVHSTDVVEVPV  
EKVI  
ERIVRVPQETIIEVPV  
EKII  
ERVCEVQV  
EKIVEVPVQQIVRVPVEVPVEHIV  
ERVVKVPVETI  
KEVPV  
EKIVEIIRPVEVIHHIEVPV  
ERIV  
ERVVEVL  
KEVPV  
DRVV  
ERLVEVPVTHTVEVPVVSVV  
EKLVEVP  
KEII  
REVPV  
EKIV  
ERVVTNVDNYIEVPV  
EKII  
ERVVTVPV  
EKRIEVPVEVVV  
ERI  
KEVQV  
EKIVEVPV  
EKII  
EKIVKVPV  
EKIVEVPVECVV  
ERIVQVPVTQTVEVPV  
ERIV  
EKIVEVQVQQIVEVPV  
EKVV  
ERVVKVPVDHVIEVPV  
ERVV  
ERI  
REVPV  
EKIIQVPV  
EKIKIVTV  
DRIVEVPVEV

*Euglena* Gene.3890\_GEFR01000334.1  
(Final third of sequence)

EKIVTVQV  
EKIVQVPV  
EKIV  
EKLVEV  
EKIV  
ERTVTV  
ERVVEVPKVV  
EKIV  
EKIVEVP  
REYI  
REVTVTSI  
KEVPV  
EKIV  
ERIVEVPITNVVEVPV  
ERVV  
ERVVEIPL  
ERVV  
ERIVEVPV  
EKII  
ERIEVPV  
ERVVEHII EVPV  
ERLV  
ERIVEIPV  
EKII  
EKIIEVPI  
EKII  
ERVIEVEVPIEI  
EKVVEI  
EKIVEVPVWV  
EKVVEV  
EKIVEVSGGVEIV  
EKIVEV  
EKIVEVPVWV  
EKVIET  
EKII  
EKGVV

TEIVPEVSTELYSTSYSTGSKGTSSSISASGGASYSVGGGYGVSGGASTGGGYAVS  
GGTGGAGYGSIGTSGGTGYSSITTGGSGTGYSSIGGTGAGVGYSSATTGGAGAGA  
GTGYSSISGSGAPGGAGGYSSTSYSSGTYGAGGGTYGAGAPGAGGYSYSSTSY  
SGTGGSGSAPGRTGYTATSGSGTRSGSATRSGSGSRA



## Predicted secondary structure

```

1 F F F E L F I S T M S K P V T T T S G R V R Y D G G S Q M R V L G G A T S G S A S S T P I F V S E T
51 S P I T T T H Y G G S V T R T Y G A S T V G V G G I S S H Y V G G T T V A G S S L A G S T R T H A V
101 G G T A I A G S S A L A G S S L T G S A A F G T G G S V L V G G S A L V G G A S S V V G G A S V V G
151 G S R V R H I G G E G P I Y V D S G Y T T S G Y S N V C C A P A G V R S T F V G S R R E V L E A A T
201 V T Q H I

1 E K V P V E I D V D I D T Y R E I V E V P I E K I V E V P Y P V E K I V Q V P V D R V V E V P V E R
51 L V E R I V R V P E V R T V E V P V E H C I E K L V T V P E I L E R E V A I E K I V E R V V R V P E
101 I H E I E V P V E K L I E R I L R V P E I H E I E V P V E R I V E K V I R V P E I R Q V E V P V E R
151 I I E K I I R V P E I H E I E V P V E K R I E T V V R V P E V H Q I E V P V E K I I E R V V R V P E
201 V H Q I E V P V E K I V E R V V Q T H T R D V I E V P V E K V V E R I V R V P Q E T L I E V P V E K
251 I V E R V V R V P Q H T T V E V P V E K V I E R V V Q T H T R D I I E V P V E K V V E R V V R V P Q
301 E T I I E V P V E K V V E R I V T V P Q H T T V E V P V E K I V E R V V Q T H T R D V I E V P V E K
351 V V E R I V K V P Q E T I I E V P V E K L I E R V C R V P Q E T I V E V P V E K I I E R V S Q T H V
401 R D I V E V P V E K L V E R I V T V P K E T V I E V P V E K I I E R I V K V P Q E T I V E V P V E K
451 L V E R V C Q T H T

1 R D I I E V P V E K I V E R V V K V P Q E T I I E V P V E K V I E R V V T V P Q E T I R E V P V E K
51 V V E R V V Q T H T R D I I E V P V E K I I E R V V K V P Q E T I V E V P V E R V I E K V C S T H T
101 R D I I E V P I E K I I E R I V K V P Q E T I I E V P V E K C I E R V V T V H S T D V V E V P V E K
151 V I E R I V R V P Q E T I I E V P V E K I I E R V C E V Q V E K I V E V P V Q Q I V R V P V E V P V
201 E H I V E R V V K V P V E T I K E V P V E K I V E I I R P V E V I H H I E V P V E R I V E R V V E V
251 L K E V P V D R V V E R L V E V P V T H T V E V P V V S V V E K L V E V P K E I I R E V P V E K I V
301 E R V V T V N V D N Y I E V P V E K I I E R V V T V P V E K R I E V P V E V V E R I K E V Q V E K
351 I V E V P V E K I I E K I V K V P V E K I V E V P V E C V V E R I V Q V P V T Q T V E V P V E R I V
401 E K I V E V Q V Q Q I V E V P V E K V V E R V V K V P V D H V I E V P V E R V V E R I R E V P V E K
451 I I Q V P V E K I K I V T V D R I V E V P V E V

1 E K I V T V Q V E K I V Q V P V E K I V E K L V E V E K I V E R T V T V E R V V E V P K V V E K I V
51 E K I V E V P R E Y I R E V T V T S I K E V P V E K I V E R I V E V P I T N V V E V P V E R V V E R
101 V V E I P L E R V V E R I V E V P V E K I I E R I I E V P V E R V V E H I I E V P V E R L V E R I V
151 E I P V E K I I E K I I E V P I E K I I E R V I E V E V P I E I E K V V E I E K I V E V P V V V E K
201 V V E V E K I V E V S G G V E I V E K I V E V E K I V E V P V V V E K V I E T E K I I E K G V V

1 T E I V P E V S T E L Y S T S Y S T G S K G T S S S I S A S G G A S Y S V G G G Y G V S G G A S T G
51 G G Y A V S G G T G G A G Y G S I G T S G G T G Y S S I T T G G S G T G Y S S I G G T G A G V G Y S
101 S A T T G G A G A G A G T G Y S S I S G S G A P G G A G G Y S S T S Y S S G T Y G A G G G T Y G A G
151 A P G A G G Y G S Y S S T S Y S G T G G S G S A P G R T G Y T A T S G S G T R S G S A T R S G S G S
201 R A

```

N.B Sequence submitted to PSPRED in 5 sectors. Longer sectors yield predictions of no secondary structure using both PSIPRED and YASPIN.

# *Euglena 15434\_G*

(First half of sequence)

## Articulin

MTVEESRTFSQTPITTYQSGARAVSNTRILSTGATTLSSATSIVDGSRRYAR  
 SAAVCCQPFDP<sup>C</sup>NSVVTRQLQTRYLDPVETTHVEKVPMEIEVDVEGYRE  
 VIEVPV

ERIVEVPV  
 ERIRTVPMQVVEVPVNRHV  
 ERLVVPEL  
 KERQVFIPKTI  
 ERVVKVPEV<sup>Y</sup>Y<sup>E</sup>VPVQRTV  
 EKVVVP  
 REVLVEVPV  
 DKVTTV  
 DRVV  
 EKHVPVEHIV  
 ERLVEQ  
 ERVVETQVKVQQIVEVP  
 REVIKN<sup>Y</sup>EV  
 ERIV  
 ERVVEVPQL  
 KEVQVPV  
 ERV<sup>Y</sup>  
 ERIVPVPK  
 RDTVQIPV  
 ERIH  
 ERIVPVPQTNIVEVPV  
 DKLI  
 ERV<sup>C</sup>TVPKQ<sup>C</sup>TVEVQV  
 EKVV  
 DRIVEVPRTITQEVLIDMVV  
 EKVVTVPS  
 EKIEVPV  
 EKVVESIVQIPKVVTHDVPV  
 EKVI  
 ERVVTVPHEQRIEIQRVV  
 ERVVQVPV  
 DRVV  
 ERVVEVPHVVT  
 REVPVESV  
 ERVVTVPVNRVVEVPV  
 DRY<sup>V</sup>  
 DRVVQVPV  
 EKVVNRVVEIPKVIT  
 REVELQQIV  
 EKIVEIPTTKVVEVPVIRY<sup>I</sup>  
 EKIVEVPVT  
 REVEVPVQKY<sup>V</sup>  
 EKIVEIPY<sup>Y</sup>  
 ERVVEVQVEVPV  
 ERIV  
 EKVVEVPFTV  
 DRVVEISI  
 EKVI  
 EKIIEV  
 ERRVEVPVEVIV  
 EKVV

*Euglena* 15434\_G  
(Second half of sequence)

EKVVEIEVPVII  
EKVVEI  
EKIVEV  
ERRVEVPFDTIVEV  
ERVVEV  
EKIVEIPIEVVKNV  
ERVV  
EKTIE

TSYDVTPVVEQKVSSFSASGGGSYSTSASYSTGGGYASGGGGYVSGGGGGFT  
SGGGGYVSGGGYSSGGGTGGSAFIGGGGSGGSAFISGGGSGGSAFISGGGSG  
GSAFISGGGGSGSGSRVTGGFSSSGALPGAAGVTGTTQLYSSQTSSLSGSTGA  
WGLPKQY

## Articulin

...AASPVDDLPGRRPGGGPELVAMAPALGSGVAGGQAVGDQGEVVDLMQIGSE  
 QEIVEALEVESFDSRAVHQVALLEEDSPLWRSPVKPNGVV

ERIVPV  
 ERLIEVPKVIHCVE  
 ERIVEVPIQRIV  
 ERLVPMEVTHI  
 KEVPV  
 ERIV  
 EKLVEVPVVTI  
 KEVPVETVV  
 ERVEVTV  
 EKVV  
 EKLTV  
 EKIVEVPTFVEVIHVKVIEVPV  
 ERVI  
 EKIV  
 ERPVPVSVV  
 ERLVEVPVQHVVQVPV  
 EKIV  
 ERIVEV  
 EKPVTVTH  
 EKIVEVPV  
 DRIV  
 EKVVTQEVPRIVEVPV  
 ERLV  
 ERLVEVPVVTI  
 KEVPI  
 ERVV  
 ERVEVITV  
 EKVV  
 EKVPV  
 EKIVEV  
 EKVVRVVE  
 DRIVEVPVAVRIQQVV  
 ERPVVETRVETI  
 REVPV  
 REIVQIPVYEVI  
 ERI  
 KEVQVPYT  
 REVPVEHV  
 EKIVEFVEVPIYV  
 DRIVEVPP

SVRSTSRAQQKISAHQRQCGASRRNGSGRW

## Articulin

...YVRHYTDLQPTHREYVEMVPVEVSVQEEIIQDIEVPTFERRRRMVWEEFGG  
 AAPTVPFRPVTPERPVPVPLQRPADTFAPVPVPHEGAQTVAPSERHGPV**G**  
 PAEHTLQVVRVPQVQRVEVPV

ERVV  
 EKVVTVPQVQRVEVPV  
 ERLV  
 EKVVKVPEVRIVEVPV  
 DRVI  
 ERRVEVPV  
 DRVV  
 ERVVKVPEVTTVEVPVETI  
 KEKIVTVPVQRTIEVPI  
 EKfV  
 ERIVKIPEVRTVEIPV  
 ERII  
 EKIVQVPI  
 EKIVEVPV  
 DRII  
 ERVIEVPVTKVV  
 EKVIEVPV  
 DRVVEVPV  
 EKIV  
 EKfVEVEVLV  
 ERIV  
 ERLVEVEVP  
 KEKII  
 ERIIEVPV  
 ERVI  
 EKVVEVYVPV  
 ERVVEV  
 ERIVEVPV  
 ERIV  
 ERIVEV

PYSEDLA**G**AQVPSEQMAEK**G**SSEEATRSAQAQSGSHPVSHVSSEVSSSALPPVGS  
 SSWMPGSSYASTQPSQSVASSAQSAGAVDVSTTWGPGSGYRPAARSGPSLAGY  
 VPSAGARSEPPGTAAGVDFRQYSAQLAPEAEQQRf

## Articulin

...FFSPFPLSFLSFTLQSADSQRYMSYSGAYRADYPVRSTSPRLSRPYPFSRPA  
 ERVVSPTRVVDGRYRSPSRLVSES<sup>C</sup>FPAQSTVVETTSAC<sup>I</sup>RHTQEIVE<sup>VPV</sup>VAQ  
 PVEVVRTVPMEVPTLEVVERARVQVQEHVIEVP

REHIV

EKIV

EKVVLKTIE<sup>VPV</sup>EHIVEKIIE<sup>VPV</sup>

ERLV

ERIV

ERIVEVPQ

DRLV

ERVI

EKIVE<sup>VPVE</sup>Y<sup>YPV</sup>

ERVV

EKIVEVLVEIPV

ERIV

ERIVE<sup>VPVE</sup><sup>VPV</sup>

ERIV

EKIVHVTTEVPRVQRQ

ERIIE<sup>VPV</sup>DHIVERIVE<sup>VPV</sup>DRPIS<sup>AIQ</sup>

ERLVPHTV

ERIVK<sup>YE</sup><sup>VPV</sup>DRVIE<sup>VPV</sup>EREVI

REVHV

DRPVIHQV

ERPVVHTVTRPVIHEV

ERPVIHEV

ERPVIHEV

ERPVVHRV

ERPV

A<sup>VPV</sup>SVVRQEPAV<sup>C</sup>YETAPYRQRYVNG<sup>TTTY</sup>STRAPR

## Articulin

MPIPKTARDVAAALDNADGVADGKGFHGLPIVVGDSRPSSRNIVYSSPRSTRYV  
 SDEFIRTPGLPATRVGYPATRVGYPATRSRYMSGPVIHHHEPPTIVRHSTAPSA  
 SRIIRSEGPLVRRERIDQATSRTHIEKRVVPVTRVIEESVEPVRRFVQPVERRV  
 EVQPVQTVRIVEVPVERRVVDVQQVEHVVEVEVPVPVEVTKEVKVEVPVEK  
 PVYVEHVVEKIVQVDVNHETQVPIEKIVETLRVEEVVHIQVVPVQQTVEKLVTV  
 EVPHIIEVPV

EKVV  
 EKIVEV  
 EKII  
 ERIVPV  
 EKIV  
 EKEVILKIVE  
 EKIIIEVPV  
 ERVKHV  
 EKIVEVPKIIETIV  
 EKIVEVPVKHVVEVPV  
 EKIV  
 EKLVQVPVMYT  
 KEVPIETVV  
 EKEIPGPV  
 REV  
 EKIVQVPV  
 EKLVEV  
 EKIIIEVPVQVPV  
 EKIVEVPVEVPV  
 ERLV  
 EKLVEVPV  
 EKIVEVMV  
 EKVIEVPVEVPV  
 ERII  
 EKVVEVPVHV  
 EKIVEIPLEI  
 EKIV  
 EKIIIEVEIPVEIPVEI  
 ERIV  
 EKLVEVPVVV  
 EKVVEVEIPIEI  
 EKIIIEI  
 EKIVEIPIEI  
 EKIVEI  
 EKIIIEVEVPIEI  
 EKVIEV  
 EKIVEVPIEI  
 EKVI  
 EKTIEV

GTEPTTVTKYSSFSTSSAPIETKRFSSQGMSRSSTQSSSTTPGGEIQYSSSAGSAESTGT  
 GTGWGTPGTNRSAWLGNMNN

## Articulin

MTVTITPTMTIQQTPGRFTX

EREVG<sup>Y</sup>RKLH  
 RDVLQEIHEVLV  
 EKPVEVIQTEVME<sup>VPV</sup>KHIE  
 ERVVAETH  
 ERIVE<sup>VPV</sup>  
 EKIV  
 ERVV  
 EKVVVKTVE<sup>VPV</sup>  
 ERIV  
 EKIVE<sup>VPV</sup>  
 ERIVEV<sup>Y</sup>V  
 EKIVEVP  
 RDKIV  
 ERIV  
 EKFVEVPQIV  
 ERIV  
 EKIE<sup>VPV</sup>D<sup>Y</sup>PV  
 ERVV  
 EKL<sup>VQ</sup><sup>VPVE</sup><sup>VPV</sup>  
 ERIV  
 ERIVE<sup>VPVE</sup><sup>VPV</sup>  
 DRIV  
 EKIVEVEVE<sup>VPVIQ</sup>  
 DRERVVEVPTDNI  
 REKVVE<sup>VPV</sup>  
 ERLVEVPS  
 EREVVKQVQ<sup>VPVE</sup>EIPVEVEPEVDVVIV  
 DKA<sup>V</sup>  
 EKT  
 ERPKRITLADQ<sup>Y</sup>VPP<sup>Y</sup>SL  
 DK<sup>Y</sup>  
 KERSS

ASYQYTAPEKSVEYVTHAPSEKRYTRSSSG<sup>Q</sup>VVHEYAAPAKSVEYVTS  
 GPERGQVLREYTREYYEDPAHEG<sup>D</sup>YRISSGRHGTA<sup>Y</sup>EAA<sup>R</sup>ALDAADGRLDG  
 KYQGKDIYVNGEKVRS<sup>G</sup>XA<sup>CC</sup>LRRPQ<sup>R</sup>LHKSQPAGEQQVAVAITRVQAXV  
 TM<sup>C</sup>ERLSILPRSPSLPPQQGHLVLAGDLHLPLYTQKKQVRDR<sup>V</sup>NKATGTGWV  
 MAIGNQRQVKGQPSSAIRVLRMSSKKHSMGSAEPTGS<sup>C</sup>RVEGENKHSEVR  
 GRALESDNSPKHHHLPALTSNQAIFFRNEWLQSSWWANVVSGESL<sup>C</sup>



*Eutreptiella* CAMPEP\_0113741250  
(First half of sequence)

Articulin

...GAPHSAPISSNCTIDNMSSRVTTGSASGGRVRYDGGSSQMRVRDPKISVTE  
TGTPGNEVIVVSAERDVVPTGTVTSSTYQGGSTIVRERGGYPVTSVGHSYFRS  
GSPVAVGGSSVARSAVRVGQVQAGGAYYRQGGRALYSQSVRRELLDEATE  
TTMI

EKVPIEIDVEVDN<sup>Y</sup>  
REVVEIPV  
EKIVEVP<sup>Y</sup>VPV  
ERVVE<sup>VPV</sup>VEHTV  
EKIITVPEL  
REIEIPV  
ERIV  
EKVVRVPQETLVE<sup>VPV</sup>  
EKVI  
ERVVRVPEVTEIE<sup>VPV</sup>  
ERIV  
EKVVRVPEVHEIE<sup>VPV</sup>  
EKII  
ERVVNTHS  
RDIIE<sup>VPV</sup>  
ERVI  
ERVVEVEV  
EKIVH<sup>VPV</sup>  
EKVVTVPHEVVNSV  
EKIVTVEVETI  
KE<sup>VPV</sup>ESVVEVIRPVEVTRHVE<sup>VPV</sup>EHIV  
ERIVEVV  
KE<sup>VPV</sup>  
ERV  
REKIVQ<sup>VPV</sup>TNTVE<sup>VPV</sup>VSVV  
EKLVEVP  
REIV  
RE<sup>VPV</sup>  
EKIV  
ERIVQ<sup>VPV</sup>DN<sup>Y</sup>IE<sup>VPV</sup>  
EKSV  
EKLQIPV  
EKTVEVPI  
ERVV  
EKLVE<sup>VPV</sup>ETIVE<sup>VPV</sup>  
EKL  
RESIKVVTV  
EKLIE<sup>VPV</sup>  
ERVV  
EKIIQ<sup>VPV</sup>EHSVQVPI  
ERIV  
EKIVEVQVQQIIE<sup>VPV</sup>  
EKEV  
ERVVK<sup>VPV</sup>  
EKVVEVPI  
EKIV  
ERIVQ<sup>VPV</sup>  
EKIIEVPI  
EKVVEVIKVVQN

*Eutreptiella* CAMPEP\_0113741250  
(Second half of sequence)

ERIVEVPVEV  
ERLVSVPV  
EKIIEVPL  
ERIV  
EKAVPV  
DRII  
EKVVEV  
ERIVEVPMIV  
EKFV  
DRTVTV  
EKIV  
EKIVEVPVTNVVEVPI  
ERTV  
EKVVEVPV  
EKIV  
ERIVEVPV  
EKIVEV  
EKIVENIIEIPI  
ERVI  
EKIIEVEIPIEI  
EKIVEI  
EKVVEVEIPIEI  
EKIVEI  
EKIVEVEIPIEI  
EKIVEI  
EKIVEIEVPVIV  
EKVVEI  
EKIVEVPIEI  
EKL  
ERTIVE

TAPTVETT VTTETVEVPRGAGYSSYSSSSSFSSGSRGAGGGGGGAAGGGSGGSTSYSTWSSQSGX

## Eutreptiella CAMPEP\_0113737346 (First half of sequence)

Articulin. Head domain a perfect repeat, followed by a bit of a third repeat, followed by a novel sequence (blue font)

...NDGLFAEPDHTLSQLALPGPPGGEAMAVATQRLAGKCLKATVSPKHLVFS  
 KLIPALKRAC<sup>C</sup>KRSDLLEEMADGLTTIPPSDWVLAKMAREWR<sup>C</sup>WLPSGP  
 GYFDYASQPVPWELVGGRHWPNSRGDFDERDTGHEGFSTQDFLNRPEAK  
 AAGLTAAEVIALRLYTGPYIPINRSLRVNSGRFAVTQWALD<sup>C</sup>AIGKLALAERE  
 GLLLRGLRLLPKEEWQQQYED<sup>C</sup>R<sup>C</sup>CADDAMDLWISDPAYSSTTTDMAVATGT  
 DFGGP<sup>C</sup>TFVFHAQ<sup>C</sup>DLSPADGLIGNAASVQWVSQYPDEVERLLPSNS<sup>C</sup>FLSL  
 PQGMRSELPEGMGDRKIFQFFSRFLWDYER<sup>CC</sup>PPVVTEVEEYVVRINEVMW  
 HVYRGLGSEKPPPEVTADAELTAFFLAPDPVGVDGMDGGLPEVLEEEM

NDGLFAEPDHTLSQLALPGPPGGEAMAVATQRLAGKCLKATVSPKHLVFSKLI  
 PALKRAC<sup>C</sup>KRSDLLEEMADGLTTIPPSDWVLAKMAREWR<sup>C</sup>WLPSGPGYF  
 DYASQPVPWELVGGRHWPNSRGDFDERDTGHEGFSTQDFLNRPEAKAAG  
 LTAAEVIALRLYTGPYIPINRSLRVNSGRFAVTQWALD<sup>C</sup>AIGKLALAEREGLL  
 LRGLRLLPKEEWQQQYED<sup>C</sup>R<sup>C</sup>CADDAMDLWISDPAYSSTTTDMAVATGTDF  
 GGP<sup>C</sup>TFVFHAQ<sup>C</sup>DLSPADGLIGNAASVQWVSQYPDEVERLLPSNS<sup>C</sup>FLSLP  
 QGMRSELPEGMGDRKIFQFFSRFLWDYER<sup>CC</sup>PPVVTEVEEYVVRINEVMW  
 HVYRGLGSEKPPPEVTADAELTAFFLAPDPVGVDGMDGGLPEVLEEEM

NDGLFAEPDHTLSQLALPGPPGGEAMA

ASSLN<sup>G</sup>LPTF<sup>C</sup>AVSQEDPVAVETRIEVPTVE<sup>K</sup>VTAVQAEDIQEVPMVE<sup>VPV</sup>

ERVIE<sup>VPV</sup>  
 EKII  
 ERI  
 ERIPVETIRE<sup>VPVEV</sup>  
 EKIVH<sup>VPVEHV</sup>  
 EKVVE<sup>VPV</sup>  
 ERVV  
 EKVLQ<sup>VPVEV</sup>  
 EKVV  
 EKVVE<sup>VPV</sup>  
 EKIV  
 EKVFQ<sup>VPVEV</sup>  
 EKIIH<sup>VPVEHV</sup>  
 EKVVE<sup>VPV</sup>  
 ERVV  
 EKVLQ<sup>VPVEV</sup>  
 EKIIH<sup>VPVENV</sup>  
 EKVVE<sup>VPV</sup>  
 ERVV  
 EKVLQ<sup>VPVEV</sup>

Eutreptiella CAMPEP\_0113737346  
(Second half of sequence)

EKVV  
EKVVEVPV  
EKVV  
EKVEKVPVEV  
EKIIHVPVEHV  
EKVVEVPV  
ERVV  
EKVLQVPVEV  
EKIIHVPVXXVV  
EKVVEVPV  
ERVV  
EKVLQVPVEV  
EKVV  
EKVVEVPV  
EKVV  
EKV  
EKVPVEV  
EKIIHVPVEHV  
EKVVEVPV  
ERV

## Articulin. Predicted secondary structure next slide

MAEARTGPSAMDALEDARRRATRQTRSAAEALDAVDGVMGKFFGRPIVAT  
 GPSRVVGGRSVVDSIDAFDGRRRYRSSGGVHGSAAEALDAADGVMGDRFYGR  
 PIVETRSPQRLRGVTAQALDAADGVIDGRFYGRPIVETRGATTRYDDHVEVRR  
 VHGGTRHRSKVVEVPVYHHENRIPVEVQVPVQIPVEVPVRI

ERPLAI  
 ERVVEVP  
 REVIKHVEVLVEVPHEVKVPYAV  
 EKVI  
 ERIVENVVEVPGPTKV  
 EKIVEV  
 EKIVEVEVQV  
 ERI  
 REVKVPYPV  
 ERVV  
 EKL  
 ERTYPVDRIVEVPV  
 ERIVHDHVDVP  
 RERIV  
 ERIVEVPYPV  
 EKIV  
 EKISEVADVRVV  
 EKVVQIPV  
 EKVV  
 EKVTTVPI  
 EKIVKVPI  
 EKPVIKLVH  
 KEVPVEHIV  
 EKIVEVPV  
 EKIEVEVDVPV  
 EKVV  
 EKVTRIPVEIPI  
 EKFEVPI  
 EKIVEVPVEHV  
 EKIVEVPV  
 ERII  
 EKLKVMVPVPGPPHENIY  
 RDREVPI  
 EKRVY  
 RDRIW

GGRQRGYEMPPPPPPPRDVQWISVPEAYPHQTWEWDRWQNWWDGGRYGSNMQY  
 DGGYNAGYPPAAPQSYSNMQYDGGYNAGYPPAAPQSYRYGA

## Predicted secondary structure

```

1  M A E A R T G P S A M D A L E D A D R R T A T R Q T R S A A E A L D A V D G V M D G K F F G R P I V
51  A T G P S R V V G G R S V V D S I D A F D G R R Y R S S G G V H G S A A E A L D A A D G V M D G R F
101 Y G R P I V E T R S P Q R L R G V T A Q A L D A A D G V I D G R F Y G R P I V E T R G A T T R Y D D
151 H V E V R R V H G G T R H R S K V V E V P V Y H H E N R I P V E V Q V P V Q I P V E V P V R I E R P
201 L A I E R V V E V P R E V I K H V E V L V E V P H E V K V P Y A V E K V I E R I V E N V V E V P G P
251 T K V V E K I V E V E K I V E V E V Q V E R I R E V K V P Y P V E R V V E K L V E R T Y P V D R I V
301 E V P V E R I V H D H V D V P R E R I V E R I V E V P Y P V E K I V E K I S E V A D V R V V E K V V
351 Q I P V E K V V E K V T T V P I E K I V K V P I E K P V I K L V H K E V P V E H I V E K I V E V P V
401 E K I I E V E V D V P V E K V V E K V T R I P V E I P I E K F V E V P I E K I V E V P V E H V V E K
451 I V E V P V E R I I E K L V K V M V P V P G P P H E N I I Y R D R E V P I E K R V Y R D R I W G G R
501 Q R G Y E M P P P P P P P R D V Q W I S V P E A Y P H Q T W E N D R W Q N W W D G R Y G S N M Q Y
551 D G G Y N A G Y P P A A P Q S Y S N M Q Y D G G Y N A G Y P P A A P Q S Y R Y G A

```

Articulin. Predicted secondary structure next slide

...PQVTE

REVVV  
EKVV  
EKILRVPEIHEFQVPI  
EKIV  
EKIVEVPV  
EKVVEVPV  
KEVVVEVMEV  
EKIV  
EKLVVV  
ERIV  
ERPVEV  
EKIIEVPKVV  
ERVVHKMVEVPVEVT  
REVPV  
EKIV  
ERIVEVPNIT  
EKLVVV  
EKIVEVPKVV  
EKVVVL  
EKIVEVPKVVVEQVVVV  
EKIVEVPKVI  
DRVV  
EKSVVV  
EKIVEVPKVV  
EKLI  
EKVVI  
EKVIEVPKVV  
EKL  
EKIVV  
EKVVEVV  
KEVKS  
KDLIEVPV  
ERVV  
EKVMEVSNTHVVEVPI  
EKII  
EKVVEIPIEVVVEHVVEVPV  
EKVVKFPV  
EKIVEVPVEIYI  
EKII  
EKVVEVEVPVEV  
ERILEV  
EKAVEV  
EKLVEVPI  
EKTIEVMKTV  
EKIVEVPV  
EKII  
EKIV  
EKVVEI  
EKVVEVPV  
EKVVEI  
EKVTH

*Eutreptiella* CAMPEP\_0113747498  
(second half of sequence)

SITQIPPAIETTFSFERESQSEGRHQYADVSSGESVERYHSSMSSSTHGERY  
QVVESMTTSSPSIVSGGATSPRVGQSIRVADTTNYGQSSSVMSTTSSERDGP  
MEVVEGSPRRYFSSISPRGTSEYKSIKAGAI

```

1 P Q V T E R E V V V E K V V E K I L R V P E I H E F Q V P I E K I V E K I V E V P V E K V V E V P V
51 K E V V V E V M E V E K I V E K L V V V E R I V E R P V E V E K I I E V P K V V E R V V H K M V E V
101 P V E V T R E V P V E K I V E R I V E V P N I T E K L V V V E K I V E V P K V V E K V V V L E K I V
151 E V P K V V E Q V V V V E K I V E V P K V I D R V V E K S V V V E K I V E V P K V V E K L I E K V V
201 V I E K V I E V P K V V E K L V E K I V V V E K V V E V V K E V K S K D L I E V P V E R V V E K V M
251 E V S N T H V V E V P I E K I I E K V V E I P I E V V V E H V V E V P V E K V V K F P V E K I V E V
301 P V E I Y I E K I I E K V V E V E V P V E V E R I L E V E K A V E V E K L V E V P I E K T I E V M K
351 T V E K I V E V P V E K I I E K I V E K V V E I E K V V E V P V E K V V E I E K V T H S I T Q I P P
401 A I E T T F S F E R E S Q S E G R H Q Y A D V S S G E S V E R Y H S S M S S S T G E R Y Q V V E S M
451 T T S S P S I V S G G A T S P R V G Q S I R V A D T T N Y G Q S S S V M S T T S S E R D G P M E V V
501 E G S P R R Y F S S I S P R G T S E Y K S I K A G A I

```



MSIYVGEQRYSSPQQYAAERQRYVSEPRPLDHIRVADAGYKYGTGDSKVVQ**G**  
 KRVRSQVVN**VPV**VHHDVR**VPV**EVEYPVE**VPV**VPYEVSIPREVIREVT**VPV**VERI  
 VESVN

ERKVI  
 KEIPVPQEFETIV  
 EKVV  
 EKRVSVP**G**PKY**Y**V  
 EKIVEV  
 EKIVEV  
 ERPVWRI  
 KEIPVP**Y**PV  
 EKVV  
 EKIVNVPKY**Y**I  
 DRKVEVPQDRLVQVP  
 RERE**Y**I  
 REVV  
 KEVRVP**Y**PV  
 ERIV  
 EKVVKVPQ  
 ERFV  
 EKKVPFIV  
 EKVVEHV  
 EKVEFT  
 KEVHVTV  
 EKEVIEEVEVR**VPV**  
 EKVI  
 EKRVPKII  
 EKVVEI  
 EKPRIVQKIV  
 EKTVMHP**Y**  
 EKIT  
 EKTIEVPI  
 ERHVH**VPV**  
 ERVI  
 EKQIEVPI  
 ERVV  
 EKVVQVPQEVD

**GG**DVDKVVWRDIPVFDKVVYNDYTESGHLFAYHNMPTPPPPLPNFKWVPYSYNALTLGT  
 GRSKGGPPLARSLVPPRGPPVPARLPGGRVGTIGRLPLPLGDARXXGNLQNLNIIDRFIF  
 VDPEGNVVDERADLWTERGLDPNIMHQKVSAAQAAGFHRSD**K**FWEHHFDELAHAAAQR  
 PIVDTQHFDHPVELNYHGHVSPTGRAYYPXLLAGGTATGTRVPTSLPAVLTVSLRGAASAL  
 RVWLPTDEDSGVAGALAGTGLLAAPLGPRAFDSAAPNMDEEAV**C**GGGAPPHPVVGQPEP  
 REEGSX

*Eutreptiella* CAMPEP\_0113750188  
(First half of sequence)

Articulin

MHAAAPRTPPRQGGSVTRPGSGVXXXXXXXXPHPHQLSGGVP**C**REAGSKNASHDGMV  
MQVVQESSQMGSRLAPSYNRGYLTSQEVAVARSRGSTMPSSQSSSLTRSDVIVVDE  
GRYYDSGMLSHPGSRVRH**GGYS**

ERSVV  
EKREIEIEVEVDNI  
REIVEIPV  
EKIIE**VPV**  
ERVV  
EKIVQVPQVT  
ERDVLV  
EKVV  
ERIVQ**VPV**ETRVEVPMVQTI  
EKVMAVQVENV  
RE**VPV**  
EK**Y**R  
EKLVE**VPV**  
ERVIEV**G**V  
EKLV  
ERVVQVHVDNI  
RE**VPV**  
EKVI  
EKLQIPVETI  
RE**VPV**  
ERIV  
EKVVEVR**VPV**VPV  
ERVI  
EKIVE**Y**PVQNI  
REVVV  
EKVV  
ERI  
RE**VPV**  
ERLVE**VPV**  
ERIV  
ERIVEVPIHNI  
KE**VPV**VRLV  
EKVVQ**VPV**EIPV  
ERVI  
EKIVKVPVENI  
RE**VPV**  
EKIV  
ERVVE**VPV**  
ERVV  
ERVV

*Eutreptiella* CAMPEP\_0113750188  
(Second half of sequence)

EKQVPVEV  
EKIVPVENIV  
EKLVTVQVEHI  
KEVPV  
EKIV  
ERIVEVPV  
ERVV  
EKIV  
EKVV  
ERVVEIPIEI  
EKIV  
ERVEVVEVPIEI  
EKII  
ERTVEVEVEVPVIV  
EKVVEI  
EKIVEVPIEI  
EKIV  
EKTIVE

SVGSA<sup>G</sup>SAPSASVTVTTETSSSSASGYSSGGSGYVAGSWSSASKEQAAPGGANGYS  
AFSNSAHRHANMLAALDAADGKLDGQVFSADVKTILPGSAPTAYVPPPTTRDKL  
AXEGQPQCQPIHRQPPVWLQQFRDPNPRIRVDS

# *Eutreptiella* CAMPEP\_0113750414 (First third of sequence)

## Articulin

XVMSGATQHPSYATYPSLQAPTYVGLASSAHHAAAAYRGPYASLQNTVEAS  
GIGALMPATISGPPPLLPTAQYQPPSGQEVGGQWMEEQSTVTPGNMQVESL  
TEISTHASKAKKSNKVSSGSGRSGLVRYVEVPV

EKVV  
EKVVEV  
EKIV  
EKAVPV  
ERIV  
EKVVEV  
ERIV  
EKVIPV  
EKIVTIPQVTT  
REEKIV  
DRVVKVPQKHEVVVPVEHIV  
ERVVQVPTTV  
EKVVVV  
EKVV  
ERPVEIPVATEHIVVV  
EKVV  
ERVVRVPEVLEVPVEHIVKQI  
EKVPEVRTVEVPV  
ERII  
ERLVEVPQVT  
EKEVPV  
ERIV  
ERIVKVPEVHTVEVPV  
ERLL  
EKLVEVPLVV  
EREVPV  
ERLV  
ERIQLVP  
EVRTVEVPVEVV  
RERIVKVPEVHTVEVPV  
EKVV  
ERLVEVPQIIE  
KVVVNTV  
ERIQTVPEVCTIEVPV  
EKRIETINKVPMETI  
KEVPV  
EKII  
ERIVEIPQLTTIEVPV  
EKVV  
ERVQQVTVQNI  
KEVPV  
EKXV  
ERIRKVPMTI  
KEVPV  
ERIH  
EKIVEVPQVLTIEVPV  
EKVV  
ERVQQVVVQNI  
KEVPV  
EKL  
ERIQKVPVETI

*Eutreptiella* CAMPEP\_0113750414  
(Second third of sequence)

KEVPVENII  
EKVVQVITQNV  
REVPV  
EKT  
ERIMKVPVETV  
REVPI  
EKTI  
ERLQKVPMETI  
REVPV  
EKII  
EKIVEVPLVI  
ERAIPV  
EKVV  
EKIVEVPQLTTI  
ERPVETII  
ERVVQVNTENI  
REVPV  
EKTI  
ERVHKVPMETI  
KEVLV  
EKVV  
EKIVEVPQVI  
ERAVPVETIV  
ERILEVQVQNI  
KEVPV  
EKVV  
ERVVQVPVEII  
KEVPV  
EKVMTVEVAKIVHQPVEVI  
KEVPI  
EKVVKVPEVHV  
KEVPV  
EKVI  
ERIVQVPVETV  
KEIPV  
EKIVNVEVAKIVNVPVEVL  
KEVPV  
ERIVKVPEIHV  
REAV  
EKLI  
EKLVEVPV  
EKII  
EKHIYIDRHVEVI  
KEVPV  
EKIV  
ERIVEVP  
KETVKMVVV  
EKVV  
ERVVEVP  
KETVRSVVV  
EKVV  
EKVVKVPQLHEIEVAVEQIY  
EKIVEVPGETT  
KEVPI  
EKII  
ERIVEVPV

*Eutreptiella* CAMPEP\_0113750414  
(Final third of sequence)

ERII  
EKAVTV  
EKIVEVPVRI  
ERTVEVPVTEIVEV  
EKLVIYVNVV

HHAEGPVQMDDRVSDFDWSCAFVDCSNHVVPGYRFCATHQVDHGLSRSANSL  
NIPIPHVGVPEPHKRTEKDYQALADMIREDGERRRSANSSSISQAHSSASSFSSIT  
RMSGATKTKSYEGIKSEPIIARLTTDDGTRTINIPMHRVVVLGSSSELSLEYRFATF  
EPQHCSLSSTSAGIVLRDLSDSGVVFVNEKAVGKQVSVMLQDKDRVAIGKARVSF  
VFHPT

## Articulin

...PQYSVQPLQMKQAEYQPAIYSMPQMQQAPAPVQENRVEYKEVIKEVEVPV  
 PVEVPVYQDEPEYYEVPEYVRVEVPVPHEVPRYVEVPQPYTV

EKVVEVPEPYEVV  
 KEVTVPVNVTYEVEVETVNVVPY PVEQVV  
 EKVVVVP  
 KEQIV  
 EKVVEVPV  
 EKVV  
 EKVVEVPQSVSVPYVVEIPVPYET  
 EKII EVPKPYEVIKYIEVPTPVTKEV  
 EKIV  
 EK RIPNYVKV  
 REEIKVPSRRPKLWIKNVPV  
 ERV  
 ERVEVPYKVHKYVDVRKPYEVIKKI  
 EREV  
 EKVVEVKVL  
 KEKAVPHKI  
 DKIVEIPLPYV  
 EKIVDVPQPYTVKKII  
 EKEVEVPYTVLV  
 KEEVRKPYEVTKVVNRVPQKV  
 DKVVLKYV  
 EKPF AQHYEVRVPKYDYDVPVPYEDIKY  
 RDVPFPV  
 EKL  
 DKVVEVPVP  
 REVPFKVFNEIPVPV  
 EKII EVPKPEPYDTVV  
 EKEVIVYQ

HEPHEVIQEIELVEHIVHPIEIIIEEQVIKRKIKKLRKKVYGEVLC DAPFTGQPVDQAPPDGK  
 SGKSGKSGKSKKGTGATNPQIESGPPLAFPAAYGMPGMPGMPGMPGMPLFGMPMPY  
 GVPMAF

## Articulin

XFFRLGVSMTTYEELKARREREKRLFEVPSDVLSDRTTERRVVQPAYVQDD  
 MGALAIRARPWTSQSPSTGELSLPITLCPXSVLS

REVPIQVPVEVP

REVPI

DRVFKHT

EKIPVVR

RERKIRVPVTKIVKKPVTKYVDVPVEVIT

EKVLIKRKKKIVEVPV

ERIV

EKPV

EKIIEVKV

EKIVEVPV

ERVV

EKKVNVPYEQVV

EKVVNVPVEILVNKVV

EKVV

EKIVEVPVEQVV

ERTVEVTI

ERIIQKNIEIPV

ERVQENIITIPIIKII

EKVVHVPV

EKII

EREVPVQV

EKIV

EKYDT

SDPIYVDKTVNVVVEPTVHTTTTTYETEYNYDVDGDWGGYGDNTEVTTEVITTEY  
 DGDWGGDAGVTTTTTEYTYGDDGGYGGDDGYGGY



MPEPE<sup>G</sup>SPADLQAADDIEIDVSVETLVHVDQRQVVDKPFVSVIEHLEE<sup>VPVE</sup>  
QVLESVN

ERLVL  
REVRVPI  
ERVV  
ERVV<sup>GVAIEVPY</sup>  
ERVV  
ERVVE<sup>VPV</sup>  
EKVVP  
KEIVKVI  
EKIVE<sup>VPV</sup>TRVLKTKKITPV  
ERIV  
EKRVEVPTETTVIRRVEVP<sup>Y</sup>TRIV  
ERFEEVII  
DKIV  
EKRVEVFV  
DKIV  
EKIVHVPHDVII  
EKVVEIEEEEEIVE<sup>VPV</sup>

THHETTYLDVPQRITLQDQ<sup>G</sup>YKPPKAVILNHRQPVPLPTQHQPMMHHHQPTQHPIT  
PIMLQQPYPPPTPVTALHTDWLRDRVQAAEEKNHWLQGRRYEPLSHDVEAPVRRLS  
APDPGPGSGHRMHGSTAVHEPPYAAPSSVSSRTRRSRSADQYAA

*Eutreptiella* CAMPEP\_0113754010  
(First half of sequence)

Articulin

...PEVTADAELTAFFLAPDPVGVGDGMDGGLPEVLEEEMNDGLFAEPDHTLSQL  
ALPGPPGGEAMAVATQRLAGKLGKATVSPKHLVFSKLIPALKRACRSDLLEEM  
EADGLTTIPPPSDWVLAKMAREWRWLPSPGGYFDYASQPVPWELVGGRHW  
PNSRGDFDERDTGHEGFSTQDFLNRPEAKAAGLTAAEVIALRLYTGPYIPINR  
SLRVNSGRFAVTQWALDCAIGKLALAEREGLLLRGLRLLPKEEWQQQYEDCR  
CADDAMDWLWISDPAYSSTTTDMAVATGTDFGGPCTFVFHAQCDLSPADGLIG  
NAASVQWVSQYPDEVERLLPSNSCFLSLPQGMRSSELPEGMGDRKIFQFFSRF  
LWDYERCCPPVVTEVEEYVVRINEVMWHVYRGLGSEKPPPEVTADAELTAFFL  
APDPVGVGDGMDGGLPEVLEEEMNDGLFAEPDHTLSQLALPGPPGGEAMAASS  
LNGLPTFCAVSQEDPVAVETRIEVPTVEKVTAVQAEDIQEVPMVEVPV

ERVIEVPV  
EKII  
ERIE  
RIPVETI  
REVPVEV  
EKIVHVPVEHVV  
EKVVEVPV  
ERVV  
EKVLQVPVEV  
EKVV  
EKVVEVPV  
EKIV  
EKVFQVPVEV  
EKIIHVPVEHVV  
EKVVEVPV  
ERVV  
EKVLQVPVEV  
DKVA  
EKVVEDVV  
EKVVEVPV  
ERVV  
EKVLQVP

*Eutreptiella* CAMPEP\_0113754468  
(Second half of sequence)

XKVLQVPVEV

EKIIHVPVENVV

EKVVEVPV

ERVV

EKVLQVPVEV

EKIIHVPVEHVV

EKVVEVPV

ERVV

EKVLQVPVEV

DKVA

EKVVEVPVEQAVI

RDVPV

EKTVMIVEGNMLDAAIGLAEEGKPFVFEAANGYGLTARHVEAGQQLKNKR  
ADNDRWRLHRMSPGEFTVESLSAPGLRLGVGNQSGHGFKAVLVPEGDQRA  
LLRLVPARDGSQQRVSFESVSQPGSLLNH<sup>C</sup>NGLMWFFDRPANQHFSNDSSW  
VLLSSEKENS<sup>K</sup>TSRRGGTAQLRLEGKYLNLDESSGFTIRPRAGQTIVQPVTFT  
SAQDVYPGHNPH<sup>T</sup>WTLKGTNDXGGMGITSGWGLSLEGS<sup>G</sup>FREYIRFENWKA  
YRMYRVTPPPGPELHPRKVDADRAVRRPRPGRRQPPAKKKRERKREEGLSQ  
GWX

## Articulin

MAEARTGPSAMDALEDADRRTATRQTRSAAEALDAVDGVMGKFFGRPIVAT  
 GPSRVVGGRSVVDSIDAFDGRRYRSSGGVHGSAAEALDAADGVMGDRFYGR  
 PIVETRSPQRLRGVTAQALDAADGVIDGRFYGRPIVETRGATTRYDDHVEVRR  
 VHGGTRHRSKVVVVPVYHHENRIPVEVQVPVQIPVEVPVRI

ERPLAI  
 ERVVEVP  
 REVIKHVEVLVEVPHEVKVPYAV  
 EKVI  
 ERIVENVVEVPGPTKV  
 EKIVEV  
 EKIVEVEVQV  
 ERI  
 REVKVPFLTXV  
 ERVV  
 EKL  
 ERTYPV  
 DRIVEVPV  
 ERIVHDHVDVP  
 RERIV  
 ERIVEVPYPV  
 EKIV  
 EKISEVADVRVV  
 EKVVQIPV  
 EKVV  
 EKVTTVPI  
 EKIVKVPI  
 EKPVIKLVH  
 KEVPVEHIV  
 EKIVEVPV  
 EKIIIEVEVDVPV  
 EKVV  
 EKVTRIPVEIPI  
 EKFEVPI  
 EKIVEVPVEHV  
 EKIVEVPV  
 ERII  
 EKLVKVMVPVGPPHENIY  
 RDREVPI  
 EKRVY  
 RDRIW

GGRQRGYEMPPPPPPPRDQVQWISVPEAYPHQTEWDRWQNWWDGRYGSNMQY  
 DGGYNAGYPPAAPQSYSNMQYDGGYNAGYPPAAPQSYRYGA

## Articulin. Repeat in ABD domain

MSYEEYGGYGDAEGYGEATTESWTEGYGEGGGGEAYAEGYGEASGAAYGEASG  
 AAEAYGEASYSAYGEASGAAEAYGEAYGDGGGGEETHHTDSWVEHSGGGDGGG  
 AEQWDQHEWTEEHEWGEPPGGYTSEYKMEALPDVDLGGYSEFTPTTDTYDGQA  
 GVISSSYQVEGEGQKVYTDWSYQEPTPIKEYVPYVSPEIEPEGEKVVEMIHGEPV  
 LTETKILAENQLDEVIVSVDLLSEGKVSSEVETGRRIVSKQRVIENRVEQVVQVPVET  
 FEEHLVVN

EKPKPVRVNV  
 DRLVA  
 KDV  
 DKIIY  
 KEVKVPIEVK  
 KEVVVKQEVEVPV  
 EKVI  
 ERIRKVP  
 ERII  
 EKVV  
 EKVV  
 EKIVEVPV  
 ERIVIEEEIFV  
 EKII  
 EKIIIVPVPKIV  
 EKVIKVPV  
 ERIV  
 EKVIKVPV  
 ERIV  
 EKIVEVPV  
 ERIV  
 EKIMEVPVENII  
 EKTVEVLVPSRKQHYVEQVVVE  
 ERPVEYT  
 RERAPVYVE

## Repeat

ERAPVYVE  
 ERAPVYVE  
 ERAPVYVE  
 ERAPVYVE  
 ERRVE  
 ERRAPVYMK  
 ERAPVYVE  
 ERAPVYVE  
 ERAPVYVE  
 ERRVE  
 ERHPVYVE  
 ERAPVYVE  
 ERAPVYVE  
 ERGPVYAK  
 EREPIY

TSSTYGTRRYADQEPVYANETSASPIYVDERSSAGAYY

## Articulin

XFFRLGVSMTTYEELKARREREREKRLFEVPSDVLSDRRTTERRVVQPAYVQDDM  
 GALAIRARPWTSPSRDFVGHDKTVSVYGGTVVPSHNTVSTSVLS

REVPIQVPVEVP

REVPI

DRVFKHT

EKIPVPR

RERKIRVPVTKIVKKPVTKYVDVPVEVIT

EKVLIKRKKKIVEVPV

ERIV

EKPV

EKIIEVKV

EKIVEVPV

ERVV

EKKVNVPYEQVV

EKVVNVPVEILVNKVV

EKVV

EKIVEVPVEQVV

ERTVEVTI

ERIIQKNIEIPV

ERVQENIITIPKII

EKVHVPV

EKII

EREVPVQV

EKIV

EKYD

TSDPIYVDKTVNVVVEPTVHTTTTTYETEYNYDVDGDWGGYGDNTEVTTEVITTEY  
 DGDWGGDAGVTTTTTEYTYGDDGGYGGDDGYGGY

## Articulin

MTTTTGAARALDLADGVEDGKIFYGRRIVEGNSRVLTGSRVYTRSPSRSVVR  
 TEGSVIRALDAADGVIDGKIFYGSRIVDGARLGYSTQTEYGSRIVDGSSQVYSSI  
 HRPRYSSITRGERRVVDVSSEATYKQKRVEVPVVHHETRVVPEYEVPVHIQVE  
 VPVRVVEVPYPV

ERIVEVPQDVVQ  
 ERQVIVDVPVEVRVPYPV  
 ERVRHVPV  
 ERIIEVQGPTRFVENVVHV  
 ERLVEVPIEVPVVRTV  
 ERYPVEQIVEVMVEQPVPVEHIVQVPEEYIVEEIEVEQ  
 ERLVEQVVEVPVPVEHIVEQRVPVPVPHIVEEIVEVPVENIV  
 EKLIQIPV  
 ERV  
 REVPVEQIVRQARYV  
 DRPYEVL  
 REKVVHVPV  
 ERVRHVHVDVPV  
 ERIV  
 EKIVEVPFEVPV  
 EKVVQVPV  
 ERVVQVPVEHV  
 ERPV

TRYSAPTYAAPPLRPVHHNPAFALDAADGRIDGQYFGARIAQPYNPALALDAADG  
 RIDGTYYGSTIAPQPYGPGYRPY

MSIYVGEQRYSSPQQYAAERQRYVSEPRPLDHIRVADAGYKYGTGDSKVVQ**G**  
 KRVRSQVVN**VPV**VHHDVR**VPV**EVE**YPVE****VPV**EVPEVSIPREVIREVT**VPV**ERI  
 VESVN

ERKVI  
 KEIPVPQEFETIV  
 EKVV  
 EKRVSV**P****G**PK**Y**V  
 EKIVEV  
 EKIVEV  
 ERPVWRI  
 KEIPVP**Y**PV  
 EKVV  
 EKIVNVPK**Y**I  
 DRKVEVPQ  
 DRLVQVP  
RERE**Y**I  
 REVV  
 KEVRVP**Y**PV  
 ERIV  
 EKVVKVPQ  
 ERFV  
 EKKVPFIV  
 EKVVEHV  
 EKVEFT  
 KEVHVTV  
EKEVIEEVEVR**VPV**  
 EKVI  
 EKRVPKII  
 EKVVEI  
 EKPRIVQKIV  
 EKTVMHP**Y**  
 EKIT  
 EKTIEVPI  
 ERHVH**VPV**  
 ERVI  
 EKQIEVPI  
 ERVV  
 EKVVQVPQEVD

**GG**DVDKVVWRDIPVFIDKVVYNDYTESGHLFAYHNMPTPPPPLPNFKWVPYSYNALTL  
 GTGRSAKGPVPARLPGGRVGTIGRLPLPLGDARMLGNLGQLNIIDRFIFVDPEGNVVD  
 ERADLWTERGLDPNIMHQKVSAAQAAGFHRSDKFEHHEFDELAHAAAQRPIVDTQH  
 FDHPVELNYHGHVSPTGRAYYPXLLAGGTATGTRVPTSLPAVLTVSLRGAASALRVWL  
 PTDEDSGVAGALAGTGLLAAPLGPRAFDSAAPNMDEEAV**C**GGGAPHPVGGQPEPRE  
 EGSX



## Articulin

MAEARTGPSAMDALEDADRRTATRQTRSAAEALDAVDGVMGKFFGRPIVAT  
 GPSRVVGGRSVVDSIDAFDGRRYRSSGGVHGSAAEALDAADGVMGDRFYGIV  
 ETRSPQRLRGVTAQALDAADGVIDGRFYGRPIVETRGATTRYDDHVEVRRVH  
**GG**TRHRSKVV**VPV**YHHENRIPVEVQ**VPV**QIPVE**VPV**RIERPLAIERVVEVPRE  
 VIKHVEVLVEVPHEVKVPYAV

EKVI  
 ERIVENVVEVPGPTKVV  
 EKIVEV  
 EKIVEVEVQV  
 ERI  
 REVKVPY**VPV**  
 ERVV  
 EKL  
 ERT**Y**VPV  
 DRIVE**VPV**  
 ERIVHDHVDVP  
RERIV  
 ERIVEVP**Y**VPV  
 EKIV  
 EKISEV**A**DVRVV  
 EKVVQIPV  
 EKVV  
 EKVTTVPI  
 EKIVKVPI  
 EKPVIKLVH  
 KE**VPV**EHIV  
 EKIVE**VPV**  
 EKIEVEVD**VPV**  
 EKVV  
 EKVTRIPVEIPI  
 EKfVEVPI  
 EKIVE**VPV**EHVV  
 EKIVE**VPV**  
 ERII  
 EKLVKVM**VPV**

**G**PPHENIIYRDREVPIEKRVYRDRIWGGRQRGYEMPPPPPPPPRDVQWISVPEAY  
 PHQTWEWDRWQNWWDGRYGSNMQYDGGYNAGYPPAAPQSYSNMQYDGGYN  
 AGYPPAAPQSYRYGA

## Articulin

XKVLQVPVEV

EKIIHVPVENVV

EKVVEVPV

ERVV

EKVLQVPVEV

EKIIHVPVEHVV

EKVVEVPV

ERVV

EKVLQVPVEV

DKVA

EKVVEVPVEQAVI

RDVPV

EKTVEMIVEGPNMLDAAIGLAEEGKPFVFEAANGYGLTARHVEAGQQLKNKR  
ADNDRWRLHRMSPGEFTVESLSAPGLRLGVGNQSGHGFKAVLVPEGDQRA  
LLRLVPARDGSQQRVSFESVSQPGSLLNH<sup>C</sup>NGLMWFFDRPANQHFSNDSSW  
VLLSSEKENS<sup>K</sup>TSRRGGTAQLRLEGKYLNLDESSGFTIRPRAGQTIVQPVTFT  
SAQDVYPGHNPHWTWKGTNDXGGMGITSGWGLSLEGSGFREYIRFENWKA  
YRMYRVTPPPGPELHPRKVDADRAVRRPRPGRRQPPAKKKRERKREEGLSQ  
GWX

# Alignment of Eutreptiella articulins into two groups

## Group 1

### N-terminal half

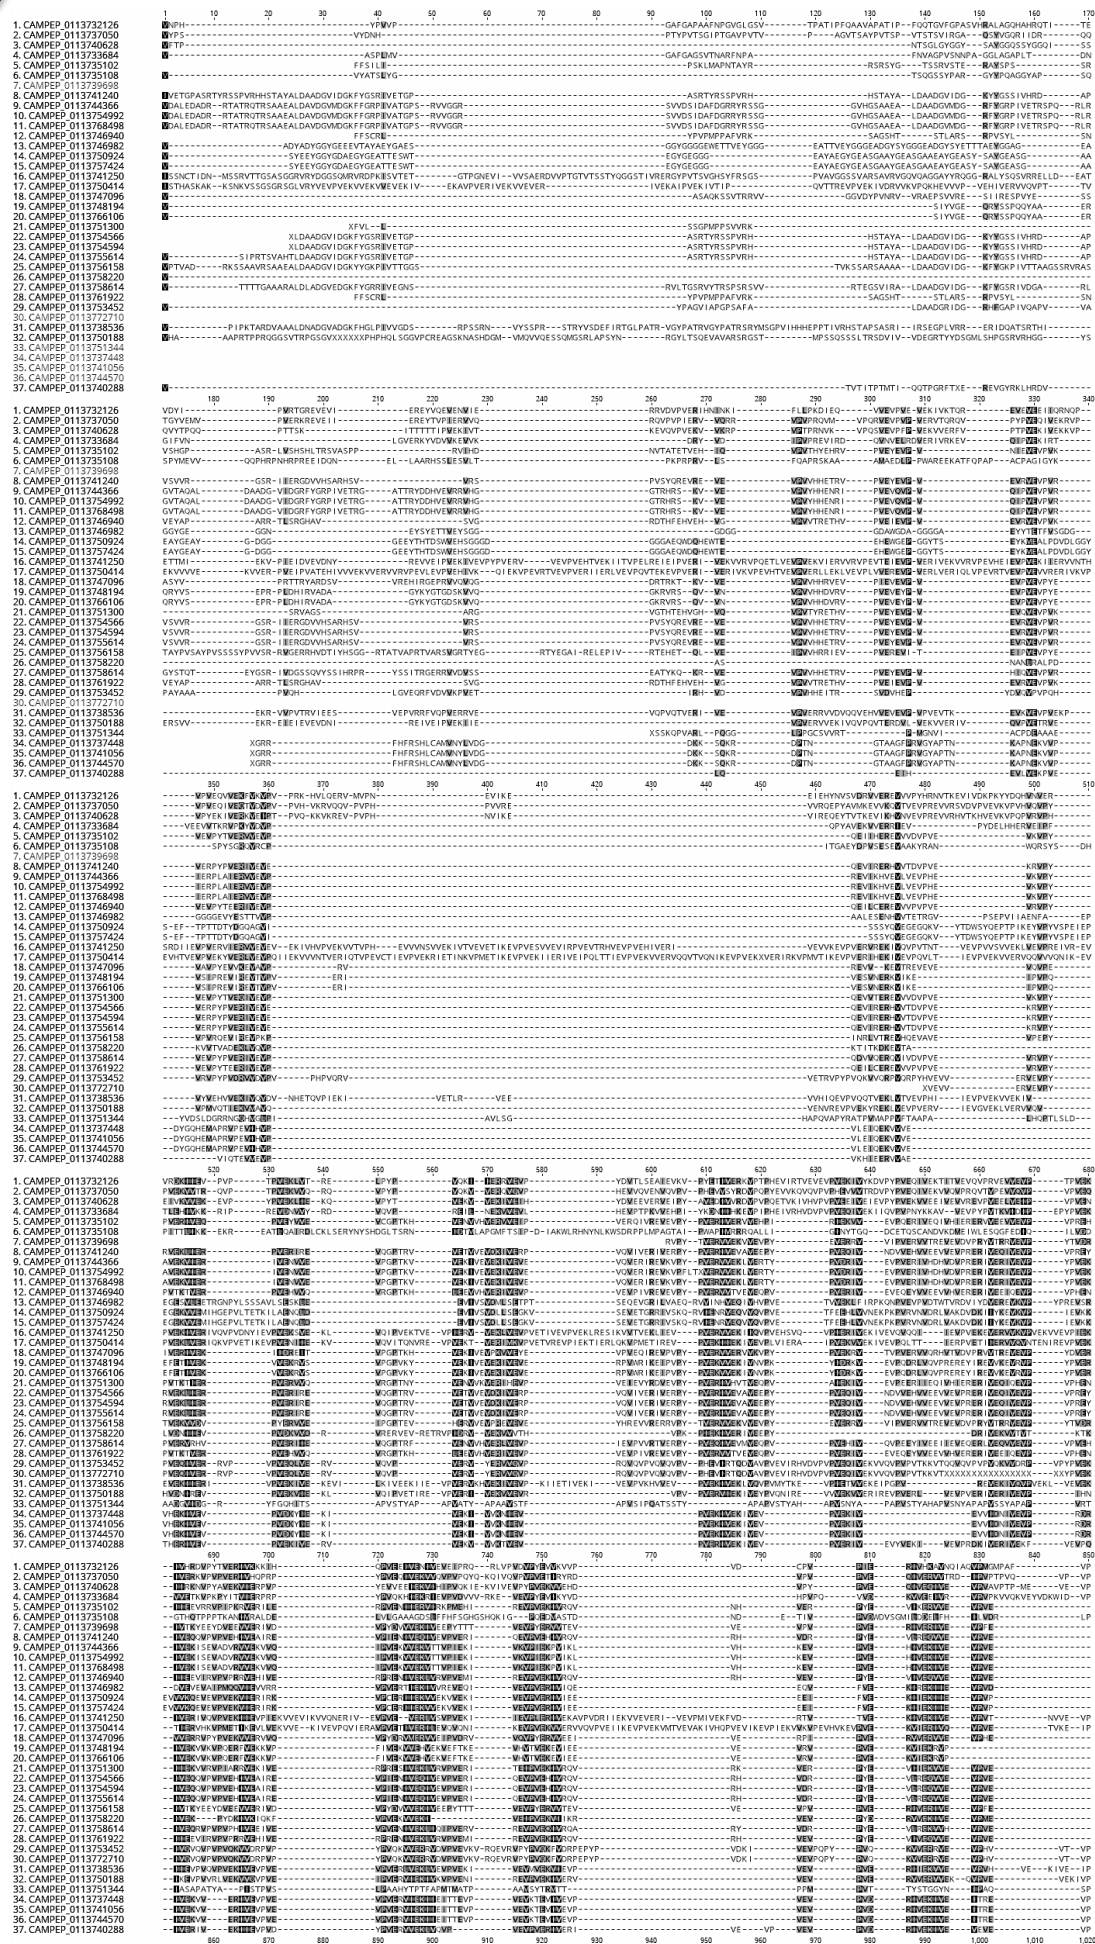

Alignment of Eutreptiella articulans into two groups

Group 1 C-terminal half

Table showing sequence alignments for Group 1 C-terminal half. It consists of 37 rows of sequence identifiers (e.g., 1. CAMPEP\_0113732126) and their corresponding amino acid sequences. The sequences are aligned in columns, with some gaps represented by dashes. The alignment is split into two main sections, each with its own column numbering (e.g., 1, 100, 200, 300, 400, 500, 600, 700, 800, 900, 1,000, 1,100, 1,200, 1,300, 1,400, 1,500, 1,600, 1,700, 1,800, 1,900).

# Alignment of *Eutreptiella articulins* into two groups

## Group 2

45

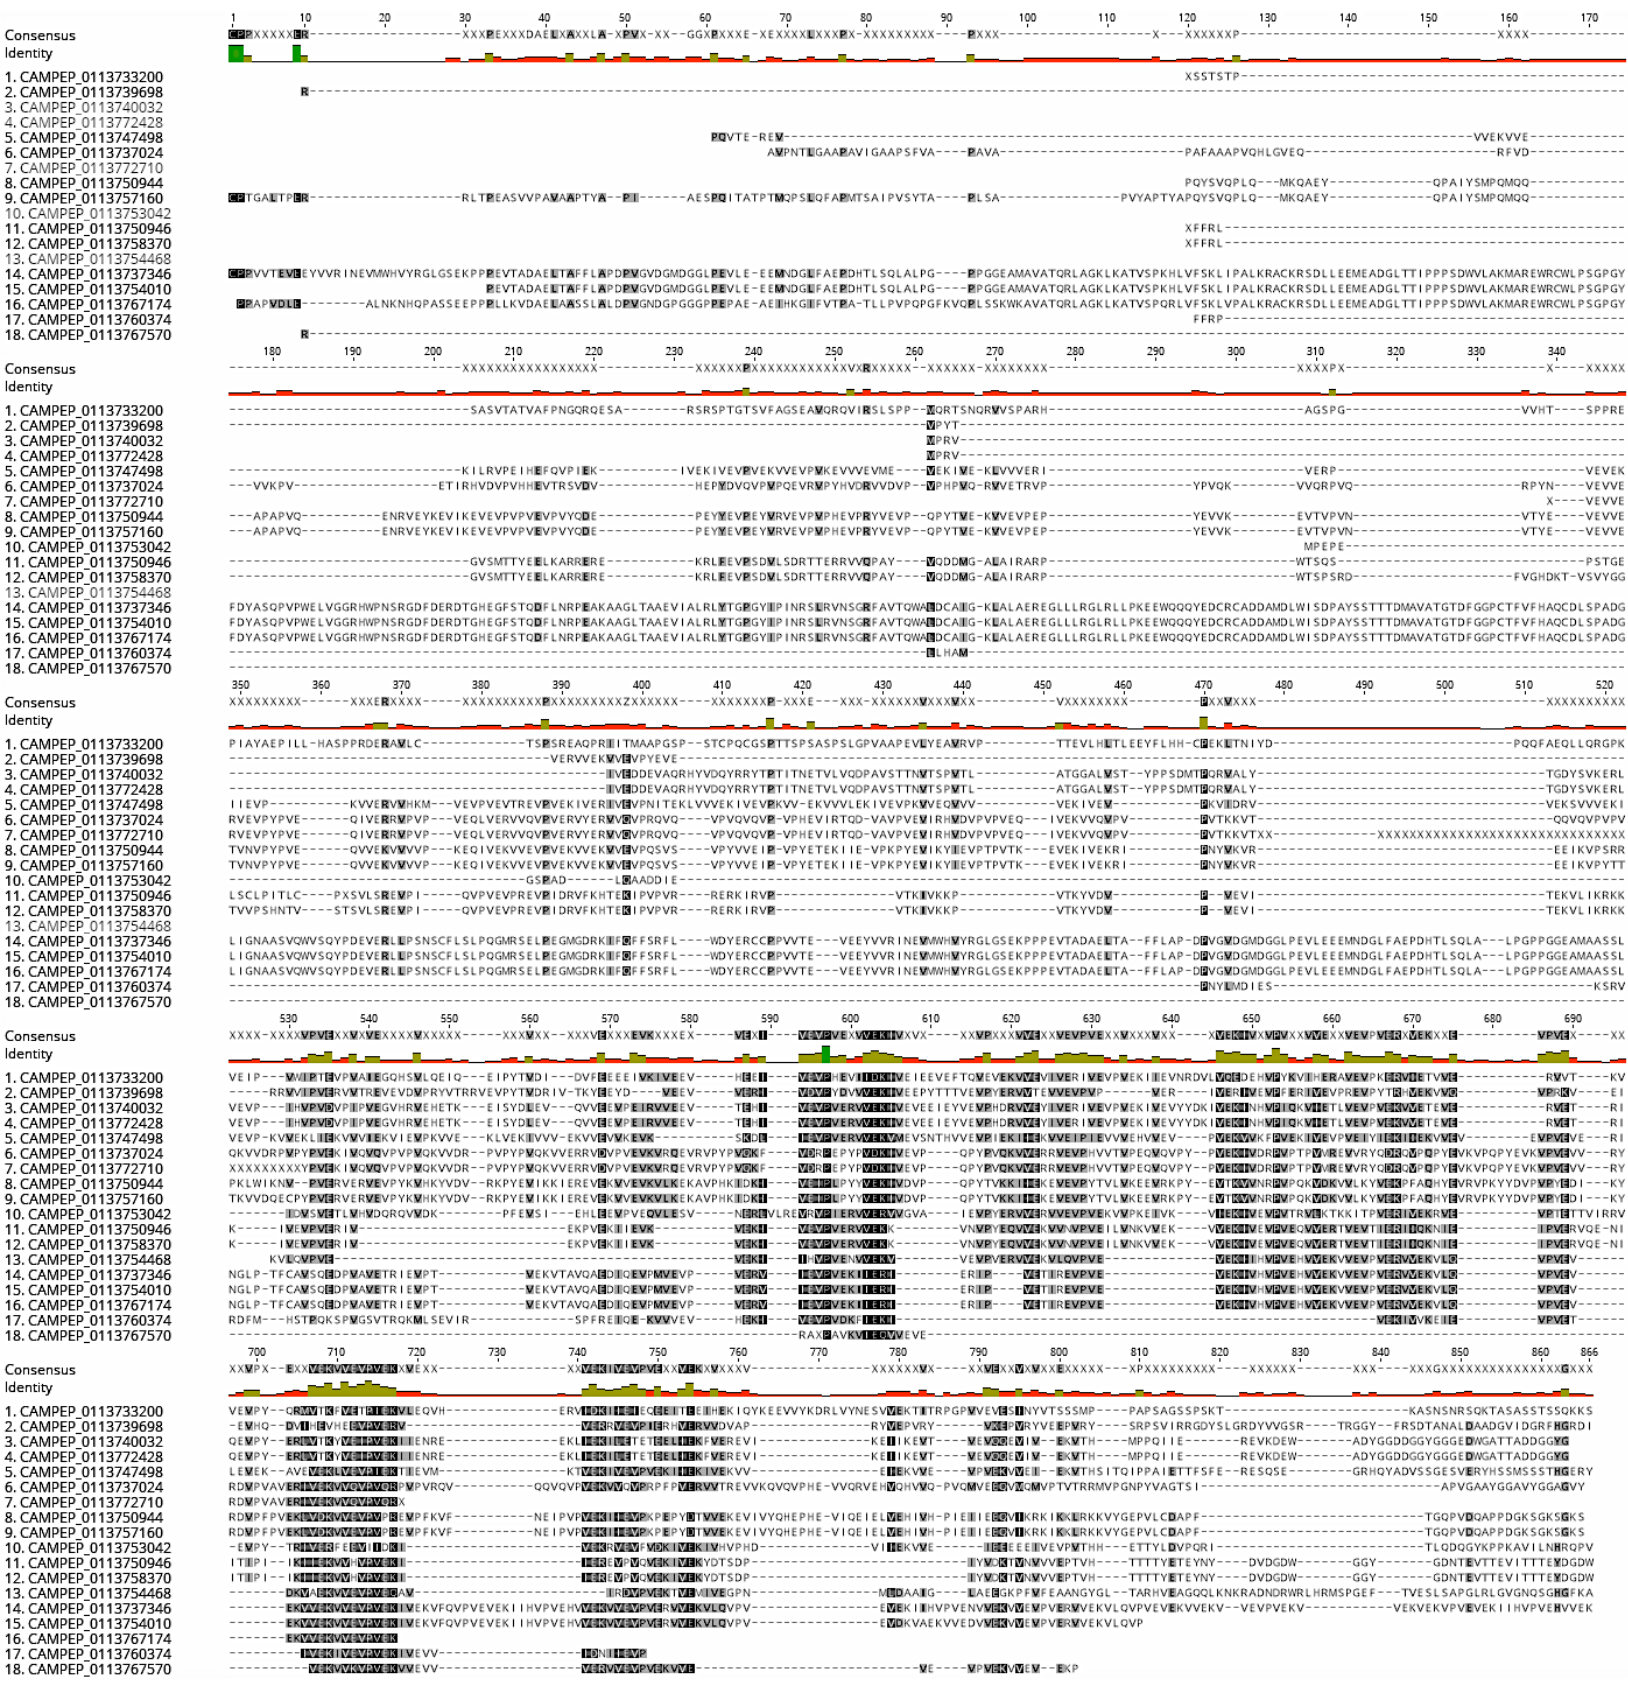

Supplement: mbo005184120sf6.pdf [file mbo005184120sf6.pdf]
