# Supplementary material for: Epiplasts: Membrane Skeletons and Epiplastin Proteins in Euglenids, Glaucophytes, Cryptophytes, Ciliates, Dinoflagellates, and Apicomplexans
Source: PubMed Central journal article supplement (PMC6212826; doi:10.1128/mbio.02020-18), 2018-10-30
Supplement: mbo005184120s5.pdf [file mbo005184120s5.pdf]

## Key to Gene Annotations

- **General organization:** The medial acid-base dyads (ABDs) are “parsed” into “strings that initiate with a dyad. N-term domain is denoted the head, C-term the tail.
- **Highlights:** Yellow, tyrosine; Green, cysteine; Pink, VPV; Gray, ABD in predicted head and tail domains.
- **Colored font:** Red, glycine residues in ABD domains; Bold-faced red, last G residue in head and first G residue in tail; Blue, alanine residues in ABD domains; Green, repeated string domains.
- **Underscores:** Acid-base triads or tetrads.
- **Commentary:** Notes on distinctive gene features (e.g. orthologues, localization patterns) in green font at top of some pages. Predicted homology domains (e.g. PDZ, coiled-coil) are given in Supplement Table 2.
- **Secondary structure:** PSIPRED predictions for a subset of proteins. Yellow, amino acids predicted in  $\beta$ -strand; pink, amino acids predicted in  $\alpha$ -helix; no highlight, amino acids predicted in disordered (random coil) domain.

## Articulin

## Orthologue of AM931979.1 and AM931980.1

MMYPGAYGAPLVGGTIGGGYGGYPTGAVETIGAGYGGYGGYSTGAVETI  
GYGGYGGY**G**ATPIMSAPMVTAAPQVQTV

ERVVEVPQLQVQEIVRQVPRVMTQEVVXN**VPV**PQIQTV  
EKVVEVPQVQTFETIIPVPQVQVQEVRQVPRVQMQEVRQMPVPQVQTV  
EKVIEVPQTQVM  
EKV**VPV**PQVVTQEVRQVPRPQTVELTRQ**VPV**PQVQTV  
EKTMQVPQVQMV  
ERTMPVPQVTVQEVRQVPR**A**MQVEVVR**A****VPV**PQ**A**TVTKRVEVPQVQTV  
ERT**VPV**PQLSVQEVV  
REVKVVPQEVRP**VPV**PQIQTV  
EKVVEVPQVQVV  
EKVMPVPQVQVQEIVRQVPR**A**IPVEVVVQ**A**PVPQV**A**TVTKRVEVPQIQTV  
EKV**VPV**PQVSIQEVRQVPRVMVQEVVKQVPRVMVQEVVKQ**VPV**PQVQAV  
ERVVEVPEVQVV  
EKIVEVPQVQTV  
EKIVQ

APAPVMAAPMIETFAPAPIMTSSIPMTTMAAPTY**G**AGFGYPAPMVGSISAALP  
MTTMAAPTYGAGLGYPAPMVGSISAALPMTTMAAPTYGAGFGYPTTIF"

*Karlodinium veneficum* AM931979.1

## Articulin

## Orthologue of AM931978.1 and AM931980.1

MYPGAYGAPLVGGTIGGGYGGYSTGAVETIGAGYGGYGGYSTGAVETIGYGGYG  
GYGATPIMSAPMVTAAPQVQTV

ERVVEVPQLQVQEIVRQVPRVMTQEVRNVPVPQIQTV  
EKVVEVPQVQTFETIIPVPQVQVQEVRQVPRVQMQEVRQMPVPQVQTV  
EKVIEVPQTQVM  
EKIVPVPQVVTQEVRQVPRPQTVELTRQVPVPQVQTV  
EKTMQVPQVQMV  
ERTMPVPQVTVQEVRQVPRAMPVEVVKAVPVPQATVTKRVEVPQVQTV  
ERTVPVPQLSVQEVV  
REVKVVPQEVRPVPVPQVQTV  
EKVVEVPQVQVV  
EKVMPVPQVQVQEIVRQVPRAPVEVVVQAPVPQVVTVTKRVEVPQVQTV  
EKVVPVPQVSVQEVRQVPRVMVQEVVKQVPVPQVQAV  
ERVVEVPEVQVV  
EKIVEVPQVQTI  
EKIVQ

APAPVMAAPMIETFAPAPIMTSSIPMTTMAAPMVGSISAALPMTTMAAPTYGAGFGYP  
APMVGSISAALPMTTMAAPTYGAGFGYPTTIF

## Articulin

## Orthologue of AM931978.1 and AM931979.1

MYPGTIGAPLMGGYGATYGSPVETFGAPLVGGYGI**G**APVFETFASAPIMSAP  
MVTAAPQVQTV

ERVVEVPQLQVQEIVRQVPRVMTQEVRN**VPV**PQIQTV  
EKVVEVPQVQTFETIIPVPQVQVQEVRQVPRVQMQEVRQMPVPQVQTV  
EKVIEVPQTQVM  
EKI**VPV**PQVVTQEVRQVPRPQTVELTRQ**VPV**PQVQTV  
EKTMQVPQMCMV  
ERTMPVPQVTVQEVRQVPR**AMP**VEVV**KAVPV**PQ**TA**TVTKRVEVPQVQTV  
ERT**VPV**PQLSVQEVV  
REVVKVVPQEVRP**VPV**PQVQTV  
EKVVEVPQVQVV  
EKVMPVPQVQVQEIVRQVPR**AI**PVEVV**QA**PVPQVVTVTKRVEVPQVQTV  
EKV**VPV**PQVSVQEVRQVPRVMVQEVLKQVPRVMVQEVVKQ**VPV**PQV**QA**V  
ERVVEVPQVQVV  
EKIVEVPQVQTV  
EKIVQ

APAPVMAAPMIETFAPAPIMTSSIPMTTMAAPMFETFAPAPIMASSIPMTTMAAPM  
V**G**SISAALPMTTMAPTYGAGFGSPTYGAGFGYPTTIF

```

 1 M Y P G T I G A P L M G G Y G A T Y G S P V V E T F G A P L V G G Y G I G A P V F E T F A S A P I M S A P
51 S A P M V T A A P Q V Q T V E R V V E V P Q L Q V Q E I V R Q V P R V M T Q E V V R N V P V P Q I Q
101 T V E K V V E V P Q V Q T F E T I I P V P Q V Q V Q E V V R Q V P R V Q M Q E V V R Q M P V P Q V Q
151 T V E K V I E V P Q T Q V M E K I V P V P Q V V T Q E V V R Q V P R P Q T V E L T R Q V P V P Q V Q
201 T V E K T M Q V P Q M Q M V E R T M P V P Q V T V Q E V V R Q V P R A M P V E V V K A V P V P Q T A
251 T V T K R V E V P Q V Q T V E R T V P V P Q L S V Q E V V R E V V K V V P Q E V V R P V P V P Q V Q
301 T V E K V V E V P Q V Q V V E K V M P V P Q V Q V Q E V I R Q V P R A I P V E V V V Q A P V P Q V V
351 T V T K R V E V P Q V Q T V E K V V P V P Q V S V Q E V V R Q V P R V M V Q E V L K Q V P R V M V Q
401 E V V K Q V P V P Q V Q A V E R V V E V P E V Q V V E K I V E V P Q V Q T V E K I V Q A P A P V M A
451 A P M I E T F A P A P I M T S S I P M T T M A A P M F E T F A P A P I M A S S I P M T T M A A P M V
501 G S I S A A L P M T T M A A P T Y G A G F G S P T Y G A G F G Y P T T I F

```

MAYSNRQSPSSPTAREPSVQRQTPVATRQDPPQASPVSSSASRKVEYHTVI

REQPQIETV  
ERQVDVPTVEFQ  
ERVVEMPQVITH  
ERIVEVPEVSQTDIIKQVPRVEY  
REVT  
KEIALPVYHGI  
DKVVEVPQQLV  
KEKITEVPQVQYVELIRQVPKPQLQYI  
DKHV  
EKPVIELQ  
ERPVEVPVTT  
REEIVEVPRYEHMELV  
KEVP  
REEIQQVQKQVIRPEVQLV  
ERPVEVVLTELH  
DRITEVPEVEY  
REIIRQVPKVEIRYI  
DKEVPITKVEYI  
EKVVEVPQIIE  
ERIVEVPEVEV  
REVIKQVPVAVTEYV  
EKEVPKHIMEYY  
EKIVDVPTVLNHETVIEVPQVLSMDLQTRVPRIDYQSVH  
KEVPKYQIMAQ  
ERVVDVPEVIQH  
ERPRHVTEVQTVDAVTQVSKPYTEYV  
EKQVPRFETQAVEMVVEVPQVL  
REEFIQEVPPQVQI

AEAIKQVHQPKFEQAVKQVQVQMEYVERVVQVESKMDREKEYIMQPVIQKETV  
YQPIVQRTIFTAPQEPVAVAPPPPPQEPRVVSPPPPPPQEPTVAPLVVTTVTAPPRTT  
ATTTITAPPQYMTQAAPQYAAATTITAPPQYMTAPAATQSLGSPQYMTAPAEPAT  
RMVQPMVFDALDTNHDGKLTREEFNRGVAQQAAPTAPGAFAPPARTTTVVAP  
GIVATGPQPMVAKLPPTTVRAQSVTIGQPSVTSIAPRPATQVVTTAAGAPMSVFD  
ALDKNHDGKLSREEFAQLRVG

6

*Kryptoperidinium\_MMETSP0120\_c13725*  
*\_g1\_i1\_g45335*

Articulin

...MAMMVAPSVGTTQWYS

REIPQVQVV  
ERVVEVPQVQV  
KENIVEVPTVL<sup>Y</sup>Q  
ERVVEVPKIQDTILTKQVPRVEVQEVT  
KEVVRPVNTIT  
ERVVEVPMTLTTEVVHE<sup>VPV</sup>VQQVDVMKQVPKPTV  
REVQKQV<sup>Y</sup>KPTPQ<sup>Y</sup>  
RERIVEVPHVMFSEQIVEVPQVQIEELI  
KEVPRHEMQVVQ  
KEV  
EKPV<sup>Y</sup>QLV  
ERVVEVPMTTV  
KE<sup>C</sup>ILEVPQVVNVDVVKQVPRHEVQVVQ  
REVPKTEIQ<sup>Y</sup>V  
EKIVEIPQIV<sup>Y</sup>E  
ERIVE<sup>VPV</sup>VET  
REVVKQVPKTEVQYI  
DKRVPKKIVQ<sup>Y</sup>V  
EKIVEVPQII<sup>Y</sup>E  
ER<sup>A</sup>VEVPQVVNVE<sup>A</sup>ITSVPRPQTQMVR  
KEIPKHIFQ<sup>A</sup>Q  
EKIVEVPLTLNH  
ERPVE<sup>VPV</sup>TQ<sup>Y</sup>VDVTVQVPS<sup>A</sup>EVQII  
DKQ<sup>VPV</sup>VQIE<sup>A</sup>  
REQVVEVPQ<sup>A</sup>F<sup>Y</sup>E  
ERLVDVPQVQMA<sup>A</sup>EVVRQVLVPQVQEI

AKQIPKIVKTEVRQRVVQVPSTLIQETAVEVPKMMMGEVVTQKASAQMQRIV  
QNWTQYQQPISREEIVQ<sup>G</sup>SKEAVVGGVHEASVIGTRSYAVPPDQIERSERVV  
TESRLSQEAPVLTTVNMPPDPQPVYRAAPPQMMYAPPVAQAAPPVITTTTT  
TAAPVYLHPTHAAPPTTAYGGAGSGVPMEPVAVAHP

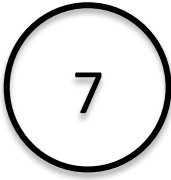

*Kryptoperidinium* MMETSP0120\_c12023  
\_g1\_i1\_g37885

Articulin

MTQEELVHVPKIIPQ

ERVVQRHVEQVVEVPITMTQEEVHVPVWVQQARTHHIHVEEIVEVPVPMT  
QEELVHVPKVITQQRDHHIHVEEIVDVMVEQRVEEIVHVPVIQTQ  
ERIVQNPIEHVVEIPKPQVI  
EKTIEVPKIQIE  
EKIIKVPKVVTVIDTTVQNQVQTIEIVKPKIIQKIVQRKKPIIQDEIRQVPKIEKQ  
MVPIQKVV  
EREVQMPQVQIIDEIVEVPVQKQVQVPMVMKVQKVVDIPQVEIVEQDVHVPV  
QKRRHVPMV

SVAQKFVDIPQVEFVD

*Kryptoperidinium\_MMETSP0120\_c320\_  
g2\_i1\_g1076*

MGSRAGPMIQEVVREVPGREVITHCTVIQYVPEIV

EKEKVVEIPQFNLYLEEEVVQRLTH

EKIVEVEQEQLHFELLTQESRVEYQEVA

KEIQKPVFEP

REVIVEVPHVLH

KEVLVEVPQVQIIDLLKQVP

KEHRQRKVVHV

EKPVVQY

RERRVEVPAVTV

KEQLVEVPVTQELEVVRQIAGPPQVQEV

EKQVN

KEIFEINETTQEVPIETM

EKVVEFPQVEI

REVVKQVPRIEVQYI

DKEVQKIEYQYV

ERIVEVPHVVYE

ERIIEVPEIEV

REVVRQIPKPMVQYV

EKRIPKQELRYL

ERTVQQPLLLQIEQPVEVPRVEIIETVAQVPRPVPQYV

DKQVQKVVIEP

REIVEEVPVLVQQEQ

AVEIADVQIMDTVTQVSAPRTEYRDKPVPVAVETKVQERIQQVPYVLT KDRLVE

VPQVQYVDIVTEEPSYDIREVLKEVPRYTVEYRHTIEEVSQQIAGPGGAPSPR

LSA



*Kryptoperidinium*\_MMETSP0120\_c1965  
\_g1\_i1\_g5573

...TAPMAMMVAPSVGTSQFYS

REIPQVQVV

ERVVEVPQVQV

KEHVIEVPTVLYQ

ERVVEVPKIQDTILTKQVPRVEVQEVT

KEVVRPVNTIS

ERVVEVPLTLTTEVLHEVPVQQVDVVKQVPKATV

REVQKQVYKPTPQYR

...QVEYV

DRVVEVPQVEYV

DRVVEVPQVEYVDRPIQVPRVEYI

DRPIEVPKVQRI

ERQEVPQVDWVL

EKVMEP

TTMQQVVRPPTYHRAPPVQVAVAPPRTTAMLPPQHYVMA**G**TAPV

...IVEVPQVQVQE VVKPVPKVRVQEVV

REVPK**Y**ETKIV

ERIVDVPQVE**Y**I

DRVVEVPEVR**Y**V

EKLVEVPRVS**Y**QDVVRHVPKIEVQE VVRTVPKVEIQT

RERVVEIPEVQ**Y**V

ERVVEVPEVQIQEVVRHV**Y**PKIEIQ

ERIRHV**Y**PK**Y**ETQLV

ERLVEVPEVQ**Y**V

DRIVEVPQID**Y**QEVV**Y**KPVPKIEVQE VIRQV**Y**PK**Y**ETQIV

EKLVEV**Y**PKIQ**Y**T

ERVVEVPEVQ**Y**V

EKIVE

*Kryptoperidinium*\_MMETSP0120\_c11415  
\_g1\_i2\_g35718

...NWSVLELVLRARMVCMSCALRWLAAEVRRLR

REV

DKMVKQKTEEIVHVPMGQQEQKQIVPIRKAVG

REVQTPQVPIFNETVDVPVQKQVVELD

EREVLQILIHDEVDVPVQKQVVELD

EREVLQILIHDE

...DASLVARALRCIEEAAPRGSMSPDRSRTIDRQKHEDLLKTATHVEHKG  
KGGGGP

DKVVLPPGKSRHVHTAVKQIHVPV  
ERTVRVPVKKHV  
ERQTETKVVNGVKMVPVKKYRTV  
KETVLET  
KEEVVEGF  
REEWKKVKVPT  
KEVVKKQVPRTVTRQVPYVEYVP  
KEVV  
REVRVP  
RDVIK

EKHGIRVDKHLGTKVMTIEEDHHYEMRPVKVKTGDVRVMETGYQHGGKSQ  
HGRSQFNP

MSQPAASAQVPMEPLA**G**SPMPPQHAEQHFSSMPNAAEEFQL  
EPEYY

ERVVEVPRIHVEN  
RERIIEVPQPQIV  
DRIVEIPQVQEVIKQIP**G**EIETHIIT  
KEVPKIEVKQV  
ERIVEVPQIE**Y**Q  
DR**Y**VEVEEV  
REIVRRVPRIEVHEIPI  
ERIVRVPKKIIQEIEQPI**Y**RPVPHLVQQRV  
EREPI

AKTQVQTLEVVQQVPVPMN**G**GSGMFMPMEPGPGMMQQP

*Kryptoperidinium\_MMETSP0120\_c52233*  
 \_g1\_i1\_g123926

MAYGGGPAYPMQFDGAQQRAAMGPGPSDAYQGNYPKPFAAHASAATTNF  
 TSGGGGFQGGSSGYQQQSSGFQQQFGAQQAYGDYDPSVFESLPKELLQ  
 GAVSFEVRDPTLVSERVVETQEHYFAAVPSSMFHSHDARDREAVRAVVKV  
 ASGDGVAVA**G**YRPVYMM

EKVVEVPHVIT

RE**Y**

DR**Y**VPKPEVI

RERLVE**A**PKIEV

ERVQQLPPRVQ**Y**

KEQIVEVPEVVIE

ERIIHVPK

REVQ

ERLIEVPKV**T**YV

ERIE**Y**EDVIE**Y**

RE**VPV**

DKIVEVPEIE**Y**RV

KEVEHMVPQ**T**Y**I**QE**Y**FV

DR**Y**

KEMPVTQVQEVQRIEQ**VPV**

SV**G**QQPGMPPPGSSFLVPRGTYQPGHYGFDGSRQG

1 M A Y G G G P A Y P M Q F D **G A Q Q** R A A M G P G P S D A Y Q G N Y P K P F A A H A S A A T T N F T  
 51 S G G G G F Q G Q S S G Y Q Q Q S S G F Q Q Q F G A Q Q A Y G D Y D P S V F E S L P K E L L Q G A  
 101 **V S F E V R D P T L V S E R V V E T Q E H Y F A A V P S S M F H S H D A R D R E A V R A V V N K V A**  
 151 S G D G V A V A G Y R P V Y M M E K V V E V P H V I T R E Y D R Y V P K P E V I R E R L V E A P K I  
 201 E V E R V Q Q L P P R V Q Y K E Q I V E V P E V V I E E R I I H V P K R E V Q E R L I E V P K V T Y  
 251 V E R I E Y E D V I E Y R E V P V D K I V E V P E I E Y R V K E V E H M V P Q T Y I Q E Y F V D R Y  
 301 K E M P V T Q V Q E V Q R I E Q V P V S V G Q Q P G M P P P G S S F L V P R G T Y Q P G H Y G F D G  
 351 S R Q G

...IEVQVQ

ERIVEVPQVQVV

EKTVEVPQVQIQEVVRHVHPKIHVQEVRHVHPKIEVQVQ

ERIVEVPQIQTV

EKMVEVPQIQVQEVRHVHPKVHIHEVVKHVHPKIEVQV

KERIVEVPQVEV

REKVVEVPRIEVQEVRHVHPKHIIET

REHIVEIPCVQIQ

ERIVEHPEIHVNEV

TRHVNKVVEVQEVRVKNVTKVDWQGANAAASLGTTFDGAATLPPGSPIHVASV

QTAMPGAPTMGWGGAPSSPVHAPTMRLPQQRVMMEPSGYS



Repeated strings in lower two-thirds of ABD domain. Homologous to string repeats in *Symbiodinium* MMETSP1367\_c42055\_g1\_i1\_g70685 (5.39).

...ELAARRPPDFDNWFDPRAFDDRPPGYAGSRPVTEPIAGSPMEPIACSSRQ  
VVEPVACSSSPQPDASRSPSSPGSWHYGRNLGYARGELDI

RDSVV  
ERSEQFR  
REVP  
KEVRKRQTVELITEVPKPEVQYV  
EKLVEVPQVQYV  
EKIVEVPQVQFV  
EKIVEVPQVQYQEMVRHVPKIVTQEIVKHVPRVEIQTV  
EKIVEVPQVQYV  
EKIVEVPQVHIQEVVKHVPRVEVQEIVRHVVKIEVQVQ  
ERIVEHRQVQFV  
EKIVEVPQVMVQVV  
DKHVQKIEVQEIVKHVVKIEVQVQ  
ERIVEHPQIQVV  
EKLVEVPQVMVQVV  
DKHVSKIQVQEVVRHVVKIEVQVQ  
ERIVEHRQVQFV  
EKIVEVPQVMVQVV  
DKHVQKIEVQEIVKHVVKIEVQVQ  
ERIVEHPQIQVV  
EKLVEVPQVMVQVV  
DKHVSKIQVQEVVRHV

*Kryptoperidinium*\_MMETSP0120\_c72315  
\_g1\_i1\_g162326

...GGGAPAA**C**RALTPPAPLSLPMEALVGPLGGGVLPVAVMRVTLPAVVPA  
HPPTPRHGAG**C**GGFFV**C**GTPRALTPPPRAPTPRASTVGTSGVALMPPPRVM  
TRPLPSDSSSPIRRRSSGVASSPTRSDMSAPRSAKAVVRLSEPVAVVT**C**AAA  
GACAMEP**GG**ESEATPVVT

RESQPA**S**QMLTD**Y**QTVI  
REKPTIQEVVKEIEVPEFHV**Y**  
ERVVEVPVTLIE  
ERILEVTH  
EREVE**A**VKQVPRVS**Y**QEL**A**IDVQKLVPTPV  
ERIVEVPQVLE  
ERLVEMPQPY**Y**VD**C**LKEVVQPQ**Y**Q**A**VQRNVFKPVVQLV  
EKHVEVP**A**PTIKEELVEIPQHVEVELLRQV**A**RHEVQEV  
EKRV  
EKPEVNVRHLVKEVPQVEFQ  
EKVVEIPRVEI  
REVVRQVPKVEVV**Y**I  
EKRVPK  
REVQWV  
EKIVEVPQIV**Y**E  
ERIIIEVPEVEVHEVVRHVPVTTVQ**Y**I  
DKPVPKFEMR**Y**T  
ERQVDVP

TELTLTHEQAVEVPEVSSVEVVTQVARPVVQHVDKQVPRVSLQAEQRFVD**C**PVP  
VR**C**EQPVEMPEVQYIDTVRQVLRPSYHIQDKPVASVEIQAVRIVEVPQVFLEER  
VVEIPQVQIVEALKQELQPIVQEVIKEVPQYQIEYTERVVEVSSSVLQEINPESQLLQ  
STATV**C****S**GRTLPPGAHGPM**L****C**QERVGSEMLPQRPVSWHPHYVQPPALPPPPP  
LAPPHLGAPGGVREES**F****C**

...SHLGACLLAIATATPRPPPARARSALRCRTCD  
SAATQQAMSTSAVSTGAY  
RQEQPMHTGSQLSSSRFANVPPMEPTAMTSMMPHIQEVVREVPGREVI  
THSTVIQYVPEIV

EKEKVVVEIPQFNLQYLEEEIVQRVTH  
EKVVEIEQEQQFEILTQEARVEYQEVM  
KEVQKPVFEP  
REVIVEVPHVLH  
KEVLVEVPQVQIFELIKQVP  
KEHRQRKVVHV  
EKPVVQF  
RERYVEVPAVTV  
KEQLVEVPVAQEMEVVRQVAGPQEVQQV  
EKQVN  
REVEINEATQEVPFVETM  
EKVIEVPQVEV  
REIVKQIPKIEVQYI  
DKQVPKVEYQYV  
EKIVEV

...SELACGASAGSQPMMPAQVMQYGGGGPPQEPTVMRPQTPGTTAI

REMPKVELV  
EKVVEVPNVQVQ  
EKFIDVPTTL<sup>Y</sup>Q  
ERIVEVPQIQVAELIKQVPKVEVQE<sup>V</sup>VKHVA<sup>K</sup>PKVTEV<sup>Y</sup>  
ERVVEVPQVMSV  
EKLVEVPQVQQVEVVRQIVRPQVQ<sup>Y</sup>V  
EKQVPKPV<sup>Y</sup>EV  
REKIVEVPQA<sup>T</sup>IQEQLVEVPKIE<sup>Y</sup>VELV  
KEVPRPEVQVVQKNV  
DKPVVQ<sup>C</sup>V  
ERIVEVPQVTVQE<sup>V</sup>IMEVPQVEIQEVVRQVPKVEVQMV  
DKQVKK  
REIQ<sup>Y</sup>I  
EKIVEVPQIV<sup>Y</sup>YE  
ERIVEVPKIE<sup>Y</sup>  
REIKQVPKPKQIQ<sup>Y</sup>I  
DKKVPKHII<sup>Y</sup>V  
EKIVEVPQVV<sup>Y</sup>YE  
ER<sup>A</sup>VDVPQVHHVE<sup>A</sup>ITEVPKPHVQQVQKPIPK<sup>Y</sup>YEIRA<sup>A</sup>Q  
ERIVEVPTILRVEQPIEVPQVLVAEVVTQVPRPEIQ<sup>Y</sup>I  
DREIPVIRTEA  
REQIVEVPQVQIEELI  
KEVPR

MSPMAGGGLQQPVG TAPGASPASSRGFATPVGT SRSGMMMMHTSSLD **GQ**  
SETLMEVPQH HFR EKIVEVPTI **CA**

KEVVK **A**VPRVEVHEVI  
KEVPKVE **Y**QVT  
ERIVEVPEVH **Y**V  
EKIVEIPEVHM  
REVVKTVPKVEVQEVIKNVPKVKT V FQ  
EKIVEVPQVHQV  
EKIIEVPQIHVQE VVKHVPKHMIQEIVKHVPRVELQTV  
EKIVEVPQVSFV  
EKVVEVPQIQVQE VVKHVPKVHVHEVV  
REVPKIHTE **Y**  
RERIVEIPQVHIQ  
ERIVEVPRIEVQEIVKTVPKVEVQIV  
DRMVEVPQVQ **Y**V  
EKIVEVPQIHQV  
ERVIEVPRVHIQEIVKQVPKVEIQEIVHEVPRWETRFV  
EKIVEVP

*Oxyrrhis marina* AM931982

MSVSGKPQFSSSSWFVGQPQYVTAQAPQYMTTQAPQYITSQAPQYLTSQAPQ  
 YVTSQAPQYVTSQAPQYVTSQAFEQVSYSTGVVIDTYQTGERNLVSE<sup>RT</sup>GS<sup>QL</sup>  
 TND<sup>G</sup>TIVNIRKTRQ<sup>VPV</sup>MQVE

ERIVEVPKIEIQTV  
 ERIVEIPQIQ<sup>YV</sup>  
 DKIVEVPQIQEVI  
 KEVIKIQTQEQ  
 REVPRTVIQTV  
 EKVVVEVPQVQTV  
 ERVVQVPQIQEVVRQVPRVEIQDV<sup>YY</sup>  
EREVQIPRLV<sup>C</sup>

<sup>G</sup>DGGSRSGRFL<sup>CL</sup>RSWM<sup>CR</sup>WR

1 M S V S G K P Q F S S S S W F V G Q P Q Y V T A Q A P Q Y M T T Q A P Q Y I T S Q A P Q Y L T S Q A  
 51 P Q Y V T S Q A P Q Y V T S Q A P Q Y V T S Q A F E Q V S Y S T G V V I D T Y Q T G E R N L V S E R I  
 101 V T G S Q L T N D G T I V N I R K T R Q V P V M Q V E E R I V E V P K I E I Q T V E R I V E I P Q I  
 151 Q Y V D K I V E V P Q I Q E V I K E V I K I Q T Q E Q R E V P R T V I Q T V E K V V E V P Q V Q T V  
 201 E R V V Q V P Q I Q E V V R Q V P R V E I Q D V Y Y E R E V Q I P R L V C G D G G S R S G R F L C L  
 251 R S W M C R W R

*Oxyrrhis marina* AM931981

MSVSGQPTTQQYAGQPQFMGTQQFVGQPQFMGTQQFVGQPQYIASQAPQYVTTQAPQYVT  
TQAPQYVTTQAPQYVTTQAPQYVTSQPAQFITSQAPQYITSQAVEQQQVSYSTGVVIDTYQT**G**

ERNLVS  
ERVTGSQTLTND**G**TIVNIRKTRQ**VPV**MQVE  
ERIVEVPKIEIQTV  
ERIVEIPQIQ**Y**V  
DKIVEVPQIQEVI  
KEVVKIETQEVI  
REVPRT VIQTV  
EKVVEVPQVQTV  
ERVVQVPQIQEVVRQVPRVEIQDVQVQ  
REVQIPRLVVETVEQV  
REIPVPQIV**VPV**EVIQEVVVQQ**AV**QQIV  
DRPVQVDQ**PY**QV  
ERVV  
ERP**Y**TVVQEQEVVRQQIVDVPRIQQRQVTV  
ERP**VYY**D

APVDQQYQEQVQY**G**QPQMVQSMAQPQMVQSTMVQQPMMQTVQQPMMQSIQYGAPVQYGA  
PMQY GAPVSYGAPVQYGAPVQYGPPGSQGGSVGVRPQP

## Articulin

MAAAGM**C**ASGGAC**C**GAGETTVTGERWEVVGKKGKGSYERVTSLKYYVGEHG  
SISKEPNVLISGRSPVIGAI**V****C**ML**C**IPVLLGLGYLLIWSERPVGADDVLVPPVAT  
EPD**C**VS**G**FDDW

EKSWT

KERQSY**CC**SHFQR**G****C**APLV

REVPKWVVDVN**VPV****N****VPV****K**

KE**VPV**PVTKVQTVQVK**APDP****Y****E**CHDT**ASVDAWSADHQRW****CCY****AASV****G****C**KP

IIV

DKTV**Y**KTVTKI

KE**VPV**PH**Y**IEPKKPKVHIVH

KEVP**Y**EVP**G**TPKIIPVKLPRK**VI****Y**

KDRVQVVPKLIK**VPE****AG**KVQIVHKPVPH**VH****G****HA****I****Y**VK**VPV**

KDS**Y****D****C**DE

**G**FENWFFGWSSVKKHF**CC**KTEQKG**C**PHTWHGSLHLHSHVHVEGEGHATGRIY  
D**C**HAGFSNWQQGWSVSKKKW**CC**SREERG**C**EFY**C**EGDSKMWHAACKDW**CC**  
SHFQQG**C**AATLSPLG**C**DAT**C**ELKGHSS**C**QERIHWTSHHFFSGRENS**C**ALAYS  
KVQVE**C**DV**C**RAC**C**SIEAAG**C**TVQKVATSDAFD**C**HAAYNNFFRAWSPSKKKW**CC**TI  
KRMGCEGESPPSVDPGVGMMWKHVQVNGYWTWQAVASGGGGFVKLPYD**C**QA  
GLTHRSTGWSPGKKS**W****CC**QHKQIG**C**MDVSAGAAAGAAAAAAGGAAAGAAGA



## Articulin

...TFHTFFPMKKRGGKKAPPPQEQPLAGDHPG**G**IPEVQII

EKVVEVPRVLKQPLEHLVEEIIHVPKVVVH

ERIQHRTVEQFIDIPVPQPQEEIVH**VPV**

KEY**Y**Q

DRHHHVEVEQFVDIP**VPV**QQEDVVQIPVELPQKRVIQQSVEQLIE**VPV**SITQE

EIVHVPRVVYQHRHHHAEEVEQVVDLHVPHHIEETVSVPKVIQQ

ERLVHHTVEQLVE**VPV**QIPQ

EKIVQVPKITVQ

ERQNVVHVEHVIEIPVPQTVEEIVQVPIVQTE

ERLVQNPVEITVEVPRPVIL

EKTIEVPKVQIEETIVKVPKIMQTVQHLLTVQDQIQKIEVVKPQIIQRTVRRKKPII

QENITEVPQITIEH**VPV**

EKVVKKPVDPVQIQ**Y**V

DKIVE**VPV**QKQRH**VPV**IQKVPKIVELPTLE**Y**VDHVVHVPITQHRH**VPV**VQTVK

KHVE**VPV**VKYEDEILHMPVQKHVHVPMVTKVPRTVEVEQVE**Y**VDDHH

VHIPVQTHRHTV

EKRMQRTVEVPQIE**Y**V

DKV**VPV**PVQKHVHVPQV**AAV**

ERHVEVPQIQ**Y**V

DKDLE**VPV**PVHHH**VPV**LSKVSK**AVE****VPV**

KETI

EKVIE**VPV**VNQVDIPQVQTV

EKIVEVPMVQEVQKVVE**VPV**V

**G**DTLPGQQRS**C**VDLPLVRREAPPEVRMEVVQGPPMPPEYVKGLVTAAPSS

AASHAASTLGGLATPPRTGSFMPPMMGSFAPPMGSGSLTPGSLWANSAGTP

TGSPISRRA

## Articulin

MPIARTP**C**ESRGETE**EPC**STSAPVSSARRKVKRSASSRRARSKSRKRDGA  
GAEGASE**G**EHIESAQVKDF**C**AKVEVAVQTDNVNLQDLRLMVPE**K**VVEVET  
DERRQIIKYIPIERVVTV

EKRVPFV  
KEVVRT**VPV**DRIV  
EKIVE**VPV****E****G****F****G**  
EKIVEVI  
KE**VPV**  
EKVVV  
KEVV  
KE**VPV**ERIV  
EKIVEV  
EKEVI  
KE**VPV**  
EKIV  
EKVVI  
KE**VPV**DKTL  
EKEVI  
KEVI  
KE**VPV**  
ERIV  
EKIVEV  
EKEVI  
KEVPI  
EKIV  
EKEVI  
KE**VPV**  
EKIV  
EKIVEVEVI  
KE**VPV**QI

ANREVMNEMITDFAEMEPFEEVEEDAQLPEEVHQAVLEAQEIL**G**SGLEDLESF  
EEQIVQRLRTETVDHERKRSVIREMVMEALTAWLKNATPETKKALMTWGQGS  
KPKKPASWIGAALMKDDETF

## Articulin

...

ERIMEVPEVFEDELVKQVPRIQYLEV  
EKPIELPVFQAQQRIQELPTLLEQECLVEVPQVQCIELI  
REVP  
KEVVKTQKLV  
ERPVKVVGPVETTLQEELVEVPVVEEVEIIKQVPVYELQQV  
EKRVEVPAVELQ  
ERIVEVPQTEVAENPVEVPEIEICVIRQVPKYEIHVV  
DKEVVKHEIKYI  
EKLVEVPHVIYE  
ERIEVPQV  
ERRELIRHVPVSRVQVV  
DKKVPRHMLQVT  
EKTVEVPTVITEEVPQETLEVVVVETITEVPKIQMLPVPVEVPKVVNLQIQ  
ERLEEVHTTLE  
ERVVEVPEPQVVEAFTQVVRPVVEYV  
DK

...FGSSSQPALIKGWLRRARNSPRAQRRFSAMAPKLFHVLFALLVLDGLG**G**HK  
RLEPNALVDSEEAIADQLVKEAEANV

ERESPAP

KESNSTKKVPVTPKKVPVEVNVS

KEV

KESSTPSK

KEA

KEDGDEDL

EKEILDMENE

T**G**NANKTKEVRSG**C**KAASMSVLAADVLSATLG



...CRKCGHKRGAVGAAVPAGSGAVPAYAAGPPVTMMAPATSVPVTA  
 PAVV  
 TTYTRAPVTAPAVAQVAVRPQVQLV

EKIVEVPQVEVQ  
 EK<sup>Y</sup>V<sup>Y</sup>VDVPTTLY<sup>Y</sup>Q  
 EK<sup>V</sup>VEVPRVQVA<sup>A</sup>EVVKQVPKIEVQEVI  
 KEV<sup>A</sup>KPVTEV<sup>Y</sup>  
 ERTVEVTQNL<sup>Y</sup>V  
 EKLVEVPKVRVVDVVKQVPKPMKQV  
 EKQVVKPI<sup>Y</sup>EVV  
 EKLVEVPISTIEEQIVEVPKVE<sup>Y</sup>ME<sup>C</sup>I  
 REVPRPELQKAQKQV  
 EKPVMQ<sup>C</sup>V  
 EK<sup>V</sup>VEVPQ<sup>Y</sup>TIQESIVE<sup>V</sup>VPVTETHEIVKQVPSIEVQTV  
 DKEVKK  
 KEIH<sup>Y</sup>V  
 EKIVEVPQVI<sup>Y</sup>E  
 ERIIEVPKIE<sup>Y</sup>  
 REVIKQVPKPEVQ<sup>Y</sup>I  
 DKKVPKHIE<sup>Y</sup>V  
 EKIVEVPQVV<sup>Y</sup>E  
 ERVVEVPQMHHVE<sup>A</sup>ITEVPPKPMQRV  
 EKKIPKIQLRAQ  
 ERVVE<sup>V</sup>VPVTLKVEQPVEVPQVLV<sup>A</sup>EQVKQVPSTEVQ<sup>Y</sup>V  
 DREVPNITY<sup>Y</sup>QALEQIVEVPQVI  
 KEERLVEVPQVQVA<sup>A</sup>EFIKQVPKQQVQEIPKHIPKVEM<sup>R</sup>CV  
 EKIQN<sup>V</sup>VPVKLMQEV<sup>A</sup>VEVPQVLRHEVISQVSQQTEQRVVQ<sup>A</sup>AEE<sup>Y</sup>  
 ERFVN  
 RDEVVV

<sup>G</sup>EQESQFGGAYEAKVVGVPISPSTASAEMYERGQVSHVKSTEVRRQGTASAAQ  
 ASGLASG<sup>C</sup>AGYGSAQRAGDLFTALDTNGDGVLSREEMAALRTGPSTQGMRAP  
 VTMAAPMAYAGAVGAPAAMGQVTTYTAPPVYAHPMAMGPVTRAPGPPVTYGAA  
<sup>C</sup>GSGA<sup>C</sup>VTYGQG<sup>C</sup>QGC<sup>C</sup>QGSSASMRGGDLFSALDTNGDGVLSREEMAALQPA  
 PRPAQGVSF<sup>G</sup>GA<sup>V</sup>TYAT

*Symbiodinium* MMETSP1367\_c10057  
\_g1\_i3\_g23143

...RGMGGMGMGYGPGGRGGKGGKGNLPVKVIT

REVPKIEVKQV  
EKIVEIPNIEYQ  
DRLVEV  
REV  
REVVRRVPRIEV  
REIPI  
ERVIQVPKKVVQEVEQPVYRPVPHMVKQHV  
EREIPVPKPYLQTLLEVVKQVSVP

TTEDGVVIPQSEVTPQAAVQPGQTSPPAQGASPGQPVL SAPVSRTYELPPVP  
SGGTPVAPGGTVMYGSGVVSQTQVAGGDLFSKMDKDGSGAISREEF AQAQ  
QVGIATMSSPGAAGPLYGPPQSVSMGSMVMGAGFGSTPQGC CAVAYGGAATP  
PQAPSSASCIQSQRYPGQVGVVQSMGAMNPYATMSGAPGGAVAYASMPPQ  
APCGSGCFTQTQRYASAGPAASGDLFSRLDRDGS GVISREEF EQALRSGVVG  
APQSGSSQVATT

1 R G M G G M G M G Y G P G G R G G K G K G K G N L P V K V I T R E V P K I E V K Q V E K I V E I P N  
51 I E Y Q D R L V E V R E V R E V V R R V P R I E V R E I P I E R V I Q V P K K V V Q E V E Q P V Y R  
101 P V P H M V K Q H V E R E I P V P K P Y L Q T L E V V K Q V S V P T T E D G V V I P Q S E V T P Q A  
151 A V Q P G Q T S P P A Q G A S P G Q P V L S A P V S R T Y E L P P V P S G G T P V A P G G T V M Y G  
201 S G V V Q S Q T Q V A G G D L F S K M D K D G S G A I S R E E F A Q A Q Q V G I A T M S S P G A A G  
251 P L Y G P P Q S V S M G S M V M G A G F G S T P Q G C A V A Y G G A A T P P Q A P S S A S C I Q S Q  
301 R Y P G Q V G V V Q S M G A M N P Y A T M S G A P G G A V A Y A S M P P Q A P C G S G C F T Q T Q R  
351 Y A S A G P A A S G D L F S R L D R D G S G V I S R E E F E Q A L R S G V V G A P Q S G S S Q V A T  
401 T

*Symbiodinium* MMETSP1367\_c18518  
\_g1\_i1\_g41046

...PMVQKVQKEVEVPQIQYEDQVVEVPVTKQVHVPMVETVQKQVEVPQVQY  
EDQVVHVPVAKHVHVPMVQTVQKQIEVPQIEYQDEIVEVPVQKQINVPMIQKV

ERSVDVPQIQYEDQVVQVPLAKQVHVPMIQEI  
ERTVEVPQVEYVDNVVQVPV  
EKQVHVPMIQKI  
EKTVEIPQIEYVDNHVHIPVQKTRHVHVHVPV  
ERPVEVNVIEL  
EKVIDVPVVKQVEVPQVQTI  
EKIVEVPFVQVV  
EKVVEVPQV

**G**STTQGSVREVDVETEPTRQEPAQVVQQVIAGTPYPVEHAAPEVIGASPVPT  
QTEDAPVAEPIQTGA



*Symbiodinium* MMETSP1367\_c25489  
\_g1\_i1\_g50146

MIQKVQKIVDVPQIEIEEQVVEVPVAKHVQVPMIQKVQKMVEVPQVEYDDQV  
VDVPVQKQVHVPFQQVQVPMV

EKVQRSVEVPQVEFVDEVMQIPVAKQVNVPMSKV  
EKVVEIPQVQYV  
DKVVPIPVQKQVNVPMTQV  
EKIVEIPQVEFVDTHIHIPVQKHRQVPVQVPV  
EKPVEVNIETT  
EKVIDVPVVKQI AVPQIQTI  
EKIVEIPFVQVV  
EKVVEVPQV

GSTTQGSVREEHVEGETKREEHPAQVVQQVLAGPSHPVEYVTETEEPPPQ  
EPIQTAT

*Symbiodinium* MMETSP1367\_c26041  
\_g1\_i1\_g51043

...PRQMSGPVTKVVTAPPVTKVPSM**G**SPKRKLEYHTILREQATIEEV

EK**A**VEVPRVEVV

EKVEEVPI TLIHESLVEVPQLLQDEIIREVPLPQ**Y**QEVV

KEIELPQFE**A**

RERIEVPMSLIEET**Y**VEVPRVQRLEVIKQVPK**A**MARKMPKHV

EKPVIQV

RERQMPVTT**A**TV

KEEMVEVPKVEVVEMVRE**A**AVMEVQNV

EKLV

ERIEVELVT

KE**V**VPVVLQ**A**IHDNIVEVPQVE**Y**IEVV

KEIPKVEVR**Y**V

EKTVEVPKIE**Y**V

DRIVEVPQIT**Y**E

ERIVEVVQREVREIIKQVPKPVVQ**Y**V

DKKVPKH**Y**NY**Y**DNVQ

EKLAVLKQ**E**V**V**EVPEVH**A**VELLTELPKP**Q****Y**

EKVP

KEIPL**Y**QIEVV

ERIESTPVVL

KEER**A**V**V**DQVENLQVMRQVVVKPVVE**Y**V

EKTVPKVETQ**A**V

EKEVEVPMVLRQEVIVETPQLV**V****A**EVIREMPQEMTQQVV

KEVPKFQME**Y**VNKVLEVKP

ARYE**A**GMMSAPLTLGSSVASGSRYMEPGPVYQPSAGRAVSYGAQSMGSSMM  
GLLGSATS

...DPSKATMSHWAAQFQAVSVEGEPQYLAGVGSEVQGAPQVMMQRREQV  
VAGQVKQKITEIPTIQEIVEEQEVPEVQYINKIVEVPEIIQQQIEQVVEQVVHVP  
QIVEQKRVQHRHVEQFVDVPVAEQAAPQEQVVEIPVPMQEEEEIVHVPKIITQ  
TRQVQQPVEQVIEVPVPMMQEEVHVHPKIMTASRVQHQHVEELVEVPIPMT  
QEEVVHVPKVMTATRQVQQPVEQVVEVPIHQRREEVVHVHPKVVTHTRTSH  
QHVEQTVEVPVPMQEEHVHHPKILTQTRQIQQQQVEQSVEVPVPMTEEVMV  
HVPKIMTQTRVRHEHVEQTVEVPIPHTQ

EKVVHVHPKVITQ  
ERVTHQPVETT  
KEVPIPMVQEQVVHVHPKVQQ  
ERQHFFHVEEMVDIPIEQPVETQVHVPLVSKV  
ERIVHNPVDLVVEVPRPVVV  
EKSVQVPMIQVE  
EKTVRVPKVLNTVVDTVVQHQQVQNVQIVRPTVVHKVVQRRKPIVQ  
ERVQHVPKVMVQHVPVQKVI  
EKQVHIPQIQYVDEFVDVPV

ARHRRVAMPAAQAPIVHKHVHVPMVQKVQKTVEVPQIQFEDQIVEVPVAKQVN  
VPVVQTMQKQVEVPQMQYEDQIVHVPVQKQVHVPMVQKVQ

*Symbiodinium* MMETSP1367\_c33132  
\_g1\_i1\_g59119

MLASNC<sup>C</sup>KN<sup>C</sup>GNTFVSDSNF<sup>C</sup>RRC<sup>C</sup>GEKREVYGASAAPMAT<sup>G</sup>SIRTAAPAATL  
MQEPNTQVQIEEQIVEVPTILYQ

EKVVEVPKVQETILLKQVPRVEVQEVTKEVVRPI<sup>Y</sup>EVT  
EKIVEVPHTLVQ  
ERIEEVPKVEFVPLVKQVPKTQVREVQKQV<sup>G</sup>VPH<sup>Y</sup>QP  
RERIVEVPTTMVAEQMVEVPQVQI  
KELL  
KEVPRPEVKIVAKPV  
EKPVNE<sup>Y</sup>V  
ERIVEVPHTTIQE<sup>C</sup>IIEVPKVEVQEIVKQVPRPEVQVV  
DRQV  
EKLEVQ<sup>Y</sup>V  
EKLVEVPQII<sup>Y</sup>E  
EKIVEVPTVEVREVIKQVSKPEVK<sup>Y</sup>I  
EKRVPKKVIK<sup>Y</sup>V  
EKIVEVPQVI<sup>Y</sup>E  
ERPIEVELIHVEAVTQVPRPHVQFVK  
KEVPKVVLQPQ  
ERIVEVPLTLTQ  
ERPVEVPQVHV<sup>A</sup>ELMVQVPKPQVEMV  
DKEVPKIIVQ<sup>A</sup>E  
EKIVEVPQVF<sup>Y</sup>EE<sup>C</sup>LKHVPQVQV<sup>A</sup>EVI  
KEVPH<sup>Y</sup>QKQVVQKHVPKIVETKVV  
EKVVPVPV

NLVRE<sup>T</sup>AVEVPQVVQHEVIRQKAS<sup>G</sup>AMQQRIIQTGWQYQRSARKEEVVSGIAEAQQGG  
IYDAPVASVRRVSLPTNEVEVSAVITEQSVSHEAPVTTVN<sup>L</sup>KPGMFAQTQVAPA  
PVTTYGTAIVGTMTGTAAAQSIFRAAQAC<sup>P</sup>ORTAWGTGDVVSASAAATSGAAAS  
TMR<sup>T</sup>TRA<sup>E</sup>ATA<sup>C</sup>AN<sup>C</sup>GNVLMPSDF<sup>C</sup>RK<sup>C</sup>GAARSVPGAPDPFLVTEPVAPGYG  
TINTQSTLPTQPL

*Symbiodinium* MMETSP1367\_c38960  
\_g1\_i1\_g68168

...EQ

ERISHQHVEEVVEVPVPMTE

EKVVHVPKVVQQ

ERQHFFHVEETVDVPIEQHVEQVVHVPVVSRG

ERIVHNPVDLEVEVPRPIVV

EK**C**IEVPKIQVE

ERTVRVPKIVNTVV

DRVVRHSMETVEVVKPTVVHKVVQRKKPVVQ

ERVQHVPKVFIIQQVQV

EKVV

EKPVEVPQIQFVDEVVDVPMVKHRHVPTVVKQQ

KEVEVPQVE**Y**VD

Repeated strings in lower two-thirds of ABD domain. Homologous to string repeats in *Kryptoperidinium* MMETSP0120\_c71290\_g1\_i1\_G159348 (5.17).

...SDSPGQWFKENPLLQSWNASAQDALAGALP**G**QTSQLQTPRSSMSIPRAD  
MSQEVLEVPQTLFREKVVVEVPTI**C**TQELVRAVPKVEVHEII

KEVPKIE**Y**QVT  
ERVVEVPEVR**Y**V  
EKIVEVPEVHTQEIVRTVPKIEVQEVEVKTVPKVQVQVQ  
ERIEVPKV**C**HV  
ERVVEVPQVQVQEVRVTVPRLEVQEVI  
REVPKLEVRTV  
EKLVEVPQV**A**QV  
DKFVEVPQVQVQEVLRHVPKLEVHEVI  
KEVPKIQME**Y**  
RERIVEVPQLHLQ  
ERLVEVPKIEVQEVRHVPKVEVRTV  
DRVVEVPQVQ**Y**V  
EKLVEVPKVEIQ  
ERLHHVPKIHTQVV  
EKLVEVPQVQFV  
EKFVEVPQVQIQEVVRHVPKIETQEIVRTVPKVEIRTV  
EKIVEVPQVQFV  
EKIVEVPEVRIQEVRHVPKIEVQEVEVKHVPKIEVQLQ  
ERIVEHPQVHQV  
EKIVEVPQTVIQTV  
DRHVPKIEVQEIVRHVPKIDVKIQ  
ERIVEHPQIHQV  
EKVVEVPQTVVQEVRHVPKIQVQEIVKHIPKIEVQVQ  
EKIEVPQVQVV  
EKIVEVPQKQVHEVIKHVPKLQIQEVVRHVPKVEVQVQ  
ERIVEVPHIQTI  
EKVVEVPKVQIQEVVRHVKKPVIET  
RERIVEIPVVQVQ  
ERVVEHPEIHVQEVI  
KEIPKVMEVQEIVKNVQKVD

WT**G**ADVSAAMSGGSIEAPTLPPATPNAASTRYVPMSAAGDCTPSGRSVATVDIN  
AATLTPSTLNTQLNKLPTLKASCELEAPVIRLPEEASRQGSEVPVFEVPRDRVTV  
TSAELQSRPSGSPAVAAASLVAGFCVACGSSYPPGSSFCRQCGRQVDGPSQP  
QPTALPQPGMAPGMPMHPPQTAYGAPCTGMGGRPSMPTVFGSAPTQYPHGL  
RPGVDPFSFR

MPGMPGMPGMPGMPGMPGMPGMPGGPEMSGRYGMDLHMPGMPGLPGMP  
GMPGMPGFGLDVGLPGMRGFGISGMGMGGFDGMGFGLYGNGVSGIGPG  
GLAMD LGGYGGGGIQDILGEGGMELVNGGDLDAALGLLNGPGVDANGEIQ  
LPPGVEPGTKEYNDFLQQLEAQGLIEI

REEIVEVPQVVVE  
ERVVHVPGLKKQIQ  
ERLIEVPKVDWV  
ERVEYEDYVEY  
REVPV  
DKIIEVPEIEYKIKQVDQTVPQTYIQEHFV  
DKF  
REVPVTQVQET  
ERVEHVPVMVP  
KDWQPPNYE

ALGMKSSPANAPAQITVT

*Symbiodinium* MMETSP1367\_c44073  
\_g1\_i1\_g74632

MVNTVQRTVEVPQIEYIDNHVHIPIQKHRHVPVHIPV

EKPVEVTVIETLQKIVDVPVVKQVEVPQVQTI

EKIVEIPLVQTV

EKVVEVPMMGQTTQGTT

REVDIPLAPR

REEHPAQVVQQVIM

GEDHPVQVMAAQAASIAQPGISVTATPAAASASAAPAAIQEPVQTSA



*Symbiodinium* MMETSP1367\_c63059  
\_g1\_i1\_g99513

...SQVWNGFSDRRGLQIHAPHPASVVPPTWRPPWNVGSQTAAAGFHKAYS  
CPHCGNVYADDSLFCGRKCGKPRAQVPNEVPPVPSVPMQVSKSTGRLGVSQ  
TVQGGIGPQEHVTQMTSNVSNVSRQYSAPQEAYAMRPAAMPQVREVEVT  
QLATAAALEDSIKQCQVVIR

EKPEV  
REREKVVEVPTISLSENMVEVPVSLVH  
EKVVEVPQVQVVEIMKQLPKVEYQ  
ERVVQV  
EKIQLEGRVNEVEVPHVVTQECLEVELPQPKVVDVL  
REVAKVQSKQLAKHFARPVVQW  
KESI  
REVPQTTL  
REQLQEVPLRTVEVL  
REVPKPEVQRV  
EKQVEVPTIQLQ  
ERLVDVPCVEQ  
REEPTEVAKVEI  
REVVRQVPKVEVKYV  
EKKVPKQVIQYV  
EKTVEVPQVVYEEVIVEVPEVEI  
KEMVRQVPVPVVQYI  
DKPVPRRSLRAV  
EKVVPFPQVFHEEQIVEVPQQMAVELAVQVPKVQYTTSP  
KEFPKVLLEA  
REVAVEVPVVL  
REERVVEVPQVQSVPLVRQRLCPSMQAV  
DKPVPYIETRVQ  
ERQVQVPYVLQEEAIAEVPQQQLVELR  
REELQPMAEVVLKQVPKYQVEYV  
EKVVEVQ

SQVAQETSPSRESRSQA<sup>GG</sup>TAVAVSTISTQKSASLHREIQGLGLGQFHESTCPK  
CGRSRVQNSRFCHGCGYQYEA

*Symbiodinium* MMETSP1367\_c47066  
\_g1\_i1\_g79256

MEDAAEVNDDKGPPKCSASANGAEVTRTEAEGTKDEDNVEDEDVERS  
QKVETSEDVAKVE

EKAVVEE  
EKAVAE  
DKLEE  
KTVVAE  
EKTDEE  
EKVV  
EKVIEE
