# Supplementary material for: Epiplasts: Membrane Skeletons and Epiplastin Proteins in Euglenids, Glaucophytes, Cryptophytes, Ciliates, Dinoflagellates, and Apicomplexans
Source: PubMed Central journal article supplement (PMC6212826; doi:10.1128/mbio.02020-18), 2018-10-30
Supplement: mbo005184120s10.pdf [file mbo005184120s10.pdf]

## Key to Gene Annotations

- **General organization:** The medial acid-base dyads (ABDs) are “parsed” into “strings that initiate with a dyad. N-term domain is denoted the head, C-term the tail.
- **Highlights:** Yellow, tyrosine; Green, cysteine; Pink, VPV; Gray, ABD in predicted head and tail domains.
- **Colored font:** Red, glycine residues in ABD domains; Bold-faced red, last G residue in head and first G residue in tail; Blue, alanine residues in ABD domains; Green, repeated string domains.
- **Underscores:** Acid-base triads or tetrads.
- **Commentary:** Notes on distinctive gene features (e.g. orthologues, localization patterns) in green font at top of some pages. Predicted homology domains (e.g. PDZ, coiled-coil) are given in Supplement Table 2.
- **Secondary structure:** PSIPRED predictions for a subset of proteins. Yellow, amino acids predicted in  $\beta$ -strand; pink, amino acids predicted in  $\alpha$ -helix; no highlight, amino acids predicted in disordered (random coil) domain.

## Secondary structure prediction next slide

MSSIDDDNIFIEQEEPTEDVLKYAEFLGIDPVLEKELIPIALEGIKAPLPDGWRPCQSDGQL  
 YYFNFNSGESIWDHPLDAYYKEKVAKEREKLKKEKKKKKKKITTTKLDPLNSLRSSDEIPSLT  
 NMTTSSSSSVKKLRESSSSSPQNNEELIKLQDKIRSLDQQLELSNRERIEHQKIIHLNNEN  
 EKLENDLRENKNKMEVEYRNKITQLQTEKDIMEKKHKQTLQDTFIENRKQIALARQEADE  
 MFEENARLKNQAQTEAKTFKAIECQT

DKIDTKVLV

EKIV

EKIV

EKPV

EKIV

EKIV

EKVV

EKPV

EKII

EKIV

EKPV

EKIV

EKVV

EKIV

EKPKIV

EKIVEV

ERKK

TLSKTTQTEIQTISSLCQTDGVKTTSDGVNTITKTFKDMLAQTSEPRQITPKKVVTIDQSQQ  
 TTEKTRDECLQADIQLPANKHVEIETITLSPIPVQQGPKSPVLATPLKPILVTKKPKQSNKY  
 ESPSPLSISDLKENTPPRQLAKQNTFLLYKEKTEKKISEEKLLKKAKEFCSEKETIRARQE  
 MLEQAREEWKTDMLNTSIIKDGSHNMNKLKSVKQHLEKQAHSLNNDVKRVNEIQNLIA  
 LRKKKIKVLEDSIIDQSHFESYISADPDSPNSLSTSSSSSDSDTNKSHLAKILNRIEEDLALLHKKIE  
 LQNKPPVDENYKAYKKIFPELDQTNLDETSQSYQMISTKWHNYFKQTEKRRKILQGKINAFQ  
 NQLDKWISERDHKRDMFLKHGNWLLSLKHELT

## Secondary structure prediction

```

 1 M S S I D D D N I F I E Q E E P T E E D V L K Y A E F L G I D P V L E K E L I P I A L E G I K A P L
51 P D G W R P C Q S D G Q L Y Y F N F N S G E S I W D H P L D A Y Y K E K V A K E R E K L K K E K K K
101 K K K K I T T T K L D P L N S L R S S D E I P S L T N M T T L S S S S S V K K L R E S S S S S P Q N
151 N E E L I K L Q D K I R S L D Q Q L E L S N R E R I E L Q K K I I H L N N E N E K L E N D L R E N K
201 N K M E V E Y R N K I T Q L Q T E K D I M E K K H K Q T L Q D T F I E N R K Q I A L A R Q E A D E M
251 F E E N A R L K K N Q A Q T E A K T F K A I E C Q T D K I D T K V L V E K I V E K I V E K P V E K I
301 V E K I V E K V V E K P V E K I I E K I V E K P V E K I V E K V V E K I V E K P K I V E K I V E V E
351 R K K T S L S K T T Q T E I Q T I S S L C Q T D G V K T T S D G V N T I T K T F K D M L A Q T S E P
401 R Q I T P K K V V T I D Q S Q Q T T E K T T R D E C L Q A D I Q L P A N K H V E I E T I T L S P I P
451 V Q Q G P K S P V L A T P L K P I L V K T K K P K Q S N K Y E S P S P L S I S D L D K E N T P P R Q
501 L A K Q N T E F L L Y K E K T E K K I S E E K L K L K K A K E F C S Q E K E T I R A R Q E M L E Q A
551 R E E W K T D M L N T S I I K D G S Q H N M N K I L K S V K Q H L E K Q A H S L N N D V K R V N E I
601 Q N L I A L R K K K I K V L E D S I I D Q S H F E S Y I S A D P D S P N S L S T S S S S D S D T N K
651 S H L A K I L N R I E E D L A L L H K K I E L Q N K P P V D E N Y K A Y K K I F P E L D Q T N L D E
701 T S Q S Y Q M I S T K W H N Y F K Q T E K R R K I L Q G K I N A F Q N Q L D K W I S E R D H K R D M
751 F L K H G N W L L S L K H E L T

```

MTKKKEKKVVEEKKVVVEEKKPEPEKPKKSLTPSFFSRKKKDDKQDAQTPST  
 PGSSQIFEQQPTTPRDATSSEQTPVVLSSDNHLLLEDTTTQASTTLQSDEVSTT  
 SGTDDDSMLNSTSDVPVITNNEPISSLELINTTTVMTEQYQENNLGDSVQS  
 IDTTLTSSQINDSMLASVTSVESPATPVD

EKKEEETPVQQETQPVVETIVE  
 EKKEEIVVETTPEVVVD  
 EKKEESVVTETTPTSPVVE  
 EKKEVEVPESVVS  
 EKKEETQETPIVE  
 DKKEVVIETPVVE  
 DKKEETPVVVEETQPVVETVV  
 EKKEEETPIESTPAVTESPVETIIVEETQPVVVE  
 EKKEEIVSENVETVVAETTPVQQEVTEVSE  
 EKKEETPVVVEESQPVIE  
 EKKEESV  
 KEDHEAIL  
 EKALESTSIESIPEPVVEQTPVTETVVAEPTPVPVVTETTSSDDQ  
 DKKILDQVTSEFFA  
 EKSELRQIVH  
 DKAEVDLYHQY  
 REQD  
 EKEKKLL  
 EKQEQT

AASTSTSTTTSTTTTEKPSSTKTTKTTTIEESSALNWWIGIGAVAASAVIGIF  
 AAKKFKLF

1 M T K K K E K K V E E K K V V V E E K K P E P E K P K K S L T P S F F S R K K K D D K K Q D A Q T P  
 51 S T P G S S Q I F E Q Q P T T P R D A T S S E Q T P V V L S S D N H L L E D T T T Q A S T T L Q S D  
 101 E V S T T S G T T T T D D S M L N S T S D V P V I T N N E P I S S L E L I N T T T V M T E Q Y Q E N  
 151 N L G D S V Q S I D T T L T S S Q I N D S M L A S V T S V E S S P A T P V D E K K E E E T P V Q Q E  
 201 T Q P V V V E T I V E E K K E E I V V V E T T P E V V V D E K K E E S V V T E T T P T S P V V V E E  
 251 K K E V E V P E S V V S E K K E E T Q E T P I V E D K K E V V I E T P V V E D K K E E T P V V V E  
 301 E T Q P V V E T V V E K K E E E T P I E S T P A V T E S P V E T I I V E E T Q P V V V E E K K E E I  
 351 V S E N V E T V V A E T T P V Q Q E V T E V S E E K K E E T P V V V E E S Q P V I E E K K E E S V K  
 401 E D H E A I L E K A L E S T S I E S I P E P V V E Q P T P V T E T V V A E P T P V P V V T E T T E S  
 451 S D D Q D K K I L D Q V T S E F F A E K S E L R Q I V H D K A E T V D L Y H Q Y R E Q D E K E K K K  
 501 L L E K Q E Q T K A A S T S T S T T T T T E K P S S T K T T K T T T I E E S S S A L N W  
 551 V I G I G A V A A S A V I G I F A A K K F K L F

*Percolomonas* >CAMPEP\_0117428174

MKTALAAQTNAHFFTIGEITDFLIMLGYGIFPFAIHWLMYEIMFTCFKKSDGA  
 VVFHPLIDYTAGKLIVLGGIGIVTAICDAIENFLMLLLIQPDYERNNGNVSTAAV  
 IVYSLFALFKWIGLCINILFIFIYSIIFYAKILAFIVWKSSSKGDDDDYLDPLKIETA  
 IEPQVIIDTLPS

EKEEHVQEQELEVV  
 KEDSEVAEEVAEEVAEEVAEEV  
 KEEV  
 KEEM  
 KEELMEEAVEEIVEEVVEEGV  
 KEIMEEE

GELQEEEEKVVEEAVQEAVEEVVEEAIEEAVEEAVEEVIEEAVEEVVEEAVE  
 EAVEEVIEEEQQEQQEEEQQEEVEAVEEVAEE

1 M K T A L A A Q T N A H F F T I G E I T D F L I M L G Y G I F P P F A I H W L M Y E I M F T C F K K S  
 51 D G A V V F H P L I D Y T A G K L I V L G G G I V T A I C D A I E N F L M L L L I Q P D Y E R N G N  
 101 V S T A A V I V Y S L F A L F K W I G L C I N I L F I F I Y S I I F Y A K I L A F I V W K S S S K G  
 151 D D Y L D P L K I E T A I E P Q V I I D T L P S E K E E H V Q E Q E L E V V K E D S E V A E E V A E  
 201 E V A E E V A E E V K E E V K E E M K E E L M E E A V E E I V E E V V E E G V K E I M E E E G E L Q  
 251 E E E K E V V E E A V Q E A V E E V V E E A I E E A V E E A V E E V I E E A V E E V V E E A V E E A  
 301 V E E V I E E E Q Q E Q Q E E E Q Q Q E E E V A E E V A E E

6

# *Caulobacter crescentus* NP\_419492.1

## Articulin. VYV modules

MISFKTL**C**R**L**GAATLAALSLSAAPVLADGFP**G**APTRSPVPKQATPKPRTKI**VYV**

DRPVVV  
 EK**RVPVYI**  
 DRPTTQIV  
 EKVV  
 EKPVII  
 ERPVVV  
 EK**RIEVPV**  
 EK**LVEVPV**  
 EK**KVYV**  
 DRPV  
 EK**KVYV**  
 DRTV  
 EK**KVYVDRPV**  
 EK**KVYVDRIV**  
 EKVV  
 EK**RVEVPVQKIV**  
 EKVV  
 EK**PVYV**  
 DRPVPS  
 DKPA**EVV**  
 EK**IIVPIVYV**  
 DRPV**ATPAP**

**G**CAQ**P**CGYVERPAP**C**VG**P**CGYPQPAPCAS**R**CDIHWRPAPPPS**C**GH**P**CAPIAPT  
 PCAS**P**CGYGGVIEHREERSSYDERHDGYAELPPLPMGYVGSASGGRRGGGYGGV  
 GLIGGGGWRTGGYAGASASARASATASATASIRIGGGGGG**C**SG**C**GGKRH

1 M I S F K T L C R L G A A T L A A L S L S A A P V L A D G F P G A P T R S P V P K Q A T P K P R T K  
 51 I V Y V D R P V V V E K R V P V Y I D R P T T Q I V E K V V E K P V I I E R P V V V E K R I E V P V  
 101 E K L V E V P V E K K V Y V D R P V E K K V Y V D R T V E K K V Y V D R P V E K K V Y V D R I V E K  
 151 V V E K R V E V P V Q K I V E K V V E K P V Y V D R P V P S D K P A E V V E K I I Q V P I Y V Y V D  
 201 R P V A T P A P G C A Q P C G Y V E R P A P C V G P C G Y P Q P A P C A S R C D I H W R P A P P P S  
 251 C G H P C A P I P A P T P C A S P C G Y G G V I E H R E E R S Y D E R H D G Y A E L P P L P M G Y V  
 301 G S A S G G R G G G Y G G V G L I G G G G W R T G G Y A G A S A S A R A S A T A S A T A S T S I R I  
 351 G G G G G G C S G C G G K R H

## Articulin VYV modules Orthologue of NP\_419492.1

MISFKTL**C**R**L**G**A**AT**L**A**A**L**S**L**S**A**A**P**V**L**A**D**G**F**P****G**A**P**T**R**S**P**V**P**K**Q**A**T**P**K**P  
 RTK**I****V****Y****V**

DRPVVV  
 EK**R****V****P****V****Y****I**  
 DRPTTQIV  
 EKVV  
 EKPVII  
 ERPVVV  
 EK**R****I****E****V****P****V**  
 EK**L****V****E****V****P****V**  
 EK**K****V****Y****V**  
 DRPV  
 EK**K****V****Y****V**  
 DRTV  
 EK**K****V****Y****V**  
 DRPV  
 EK**K****I****Y****V**  
 DRVV  
 EKVV  
 EK**R****V****E****V****P****V**QKIV  
 EKVV  
 EK**P****V****Y****V**  
 DRPVPS  
 DK**P****A**EVV  
 EK**I****I****Q****V****P****I****Y****V****Y****V**  
 DRPV

ATPAP**G****C**A**Q**P**C**G**Y**VERPAP**C**V**G**P**C**G**Y**P**Q**PAP**C**AS**R****C**DIHWRPAPPP  
 S**C**G**H**P**C**G**P**IPAP**T**P**C**AS**P****C**G**Y**GGVIEH**R****E****E****R****S****S****Y**DERHDGYAELPPL  
 PMGYVGSASGGRGGGYGGVGLIGGGGWRTGGYAGASASARASAT  
 ASATA**S****T****S****I****R****I****G****G****G****G****G****C****S****G****C**GGKRH

*Caulobacter vibrioides* ATC34941.1

## Articulin

## VYV modules Orthologue to PLR11764.1

MISLKTLCRLGAATLAALSLSAAPALADGFP GAPARSPVPKQATPKP  
 RTKIVYV

DRPVVV  
 EKRVPVYI  
 DRPTTQIV  
 EKVV  
 EKPVII  
 ERPVVV  
 EKRIEVPV  
 EKLQVPV  
 EKT VYV  
 DRPV  
 EKL VYV  
 DRPV  
 EKK VYV  
 DRVV  
 EKRVEVPV  
 EKIV  
 EKVV  
 EKP VYV  
 DRPVPT  
 DKPGEVV  
 EKIIQVP  
 IY VYV  
 DRPVP

TPSQGCAQPCGYVERPAPCANPCGSVAPAPCASRCDIHWRPAPPPS  
 CSHPCGPIQVPPPCASPCGYGGVIEHREERSSYDERHDGYAELPPLP  
 MGYVGSASGGRGGGYGGVGLIGGGGWRSGAYGGASASARASATA  
 SATATTSIRIGGGGGGGCSGCGGKRH



## Articulin

## VYV modules. Orthologue to KRA59406.1

MVRTRVKIV

ERPVYVEKIVKQPVYIEKRTEVPVDRPVYI

DRPV

DRIV

EKRVEVPV

ERIV

EKRVEVPVVKIV

EKPV

DRPVYI

DRPV

DRVI

EKRVEVPVDRPVYV

DRPV

DRVI

EKRVEIPV

DRPVYV

DRPV

DRVV

ERRVEIPV

DRPVYV

DRVI

EKRVEVPVERIVRTPVYVEHQ

ERRV

ERR

GCDCEGDY<sup>Y</sup>EQGGAYDRVQGGFERSEESY<sup>E</sup>SESSRYSEEGQGWSSQ  
 GSYMAGDGYA<sup>Q</sup>SLGGVGGGGY<sup>Y</sup>GYSSARYGAGGGWLGGQSYGRSG  
 YSGGYSSGGYSSGGAGAGAASSARASSSASSSTSVTVSGGGHYGGGG  
 HGGGHGGGSTGGHGGCCGR

## Articulin

## VYV modules. Orthologue to KRA75086.1

MNPKNILLIGAAAITFAALGPVMISTAAADGYPARVVPVTKAKPARKPA  
VRVRVV

ERP VYV  
EKIVKQPVYIEHRVEVPV  
DRP VYV  
DRPV  
DRIV  
EKRVEVPVVKIV  
EKPV  
DRP VYV  
DRPV  
DRIV  
EKRVEVPV  
DRIV  
EKRVEVPVVRVV  
DRPV  
DRPVYI  
DRPV  
DRVV  
ERRVEVPV  
DRP VYV  
DRPV  
DRIV  
EKRVPVYV  
ERQPPVAYRR

GCDCDDRRVYQDHGRVYGGSAVEQSSESSEESYESYSERYDGDGWS  
SQGSYLAGDGYAQLDGYYYGGTTARYGVGGGWNGGQSYGGQSHGG  
QSYGGRSYYGAGGYGRAWGAGASAASSASSSTSVTVSGGGRYGGGG  
HGGGSTGGHGGCCGR

Articulin  
VYV modules

MSPKTLRVLAVFAGLTLASPVLDGYERAPVRQHHAPKRVTTRTKV  
VYV

DRVV  
ERRVPVYV  
DRPTTQIV  
EKIV  
EKPVII  
ERPVVV  
EKRIEVPV  
EKLQVPV  
EKIV  
DRPVYI  
DRPV  
EKIV  
EKIV  
EKRVEVPV  
DRPVYV  
DRPVVPV  
DRPVVPV  
DRPVPTP

APTVTPCQQACSGPGGEVVDRIIQVPVYVYVDRPVDRPVYVVPVQQQGGCCQ  
PRVCGGAVYQQQCSPCGGQRYEDSYEESRERSSEYSSDYSGSRYSAG  
GGWNAGSVGSSAWGNYIEPPPLPMGYVGAQSGGRGGGYGGPGLAGGGG  
YAGGYAGSSSSGYASSSASASASSSIHIGGGYHGGGSKGGCGACGGGG  
KHH

1 M S P K T L L R V G V L A V F A G L T L A S P V L A D G Y E R A P V R Q H H A P K R V T T R T K V V  
51 Y V D R V V E R R V P V Y V D R P T T Q I V E K I V E K P V I I E R P V V V E K R I E V P V E K L V  
101 Q V P V E K I V D R P V Y I D R P V E K I V E K I V E K R V E V P V D R P V Y V D R P V P V D R P V  
151 P V D R P V P T P A P T V T P C Q Q A C S G P G G E V V D R I I Q V P V Y V Y V D R P V D R P V Y V  
201 P V Q Q Q G G C Q P R V C G G A V Y Q Q Q C S P C G G Q R Y E D S Y Y E E S R E R S S Y E Y S S D Y  
251 S G S R Y S A G G G W N A G S V G S S A W G N Y I E P P P L P M G Y V G A Q S G G R G G G Y G G P G  
301 L A G G G G Y A G G Y A G S S S S G Y A S S S A S A S A S A S S S I H I G G G Y H G G G S K G G C G  
351 A C G G G G K H H

Articulin. VYV modules Predicted secondary structure next slide.

MVRTRVRIV

ERPVYV

EKIVKQPVI

EKRTEVPV

DRPVYI

DRPV

DRIV

EKRVEVPV

DRIV

EKRVEVPVVKIV

EKPVDRPVYI

DRPVDRVI

EKRVEIPVDRPVYVDRPV

DRVI

EKRVEIPV

DRPVYV

DRPV

DRVV

ERRVEVPVDRPVYVDRVV

EKRVEVPV

ERIVRTPYV

ERQ

ERRV

ERR

GCDCGDRGYEQGRVYDRAEGSVERSEESYSESSRYSEEGQGWSS  
 QGSYMGAGDYAQLGGVGGGGYYGYSSARYGAGGGWLGGQTYGRSG  
 YSGGYSSGWAGAGAASSARASSSASSSTSVTVSGGGHYGGGGHGGGY  
 GGGHGGGHGGGSTGGHGGCCGR

## Predicted secondary structure.

1 M V R T R V R I V E R P V Y V E K I V K Q P V Y I E K R T E V P V D R P V Y I D R P V D R I V E K R  
51 V E V P V D R I V E K R V E V P V V K I V E K P V D R P V Y I D R P V D R V I E K R V E I P V D R P  
101 V Y V D R P V D R V I E K R V E I P V D R P V Y V D R P V D R V V E R R V E V P V D R P V Y V D R V  
151 V E K R V E V P V E R I V R T P V Y V E R Q E R R V E R R G C D C D G D R G Y Y E Q G R V Y D R A E  
201 G S V E R S E E S Y E S E S S R Y S E E G Q G W S S Q G S Y M A G D G Y A Q S L G G V G G G G Y Y G  
251 Y S S A R Y G A G G G W L G G Q T Y G R S G Y S G G Y S S G W A G A G A A S S A R A S S S A S S S T  
301 S V T V S G G G H Y G G G G H G G G Y G G G H G G G H G G G S T G G H G G C C G R

## Articulin VYV modules

MVRTRVRIV

ERPVYV  
 EKIVKQPVYI  
 EKRTVPV  
 DRPVYI  
 DRPV  
 DRIV  
 EKRVVPV  
 DRIV  
 EKRVVPVVKIV  
 EKPV  
 DRPVYI  
 DRPV  
 DRII  
 EKRVIPVDRPVYVDRPVDRVI  
 EKRVVPVDRPVYVDRPVDRVV  
 ERVVPVDRPVYVDRVV  
 EKRVVPV  
 ERIVRTPVYV

ERQERRVERRGCDCDGDGRGYEQGRVYDRAEGSVERSEESYESESSRYSEE  
 GQGWSSQGSYMAGDGYAQLGGVGGGGYGYSSARYGAGGGWLGGQTYG  
 RSGYSGGYSSGWAGAGAASSARASSASSSTSVTVSGGGHYGGGGHGGGY  
 GGGHGGGHGGGSTGGHGGCCGR





| Description                                                                                                                | Max score | Total score | Query cover | E value | Ident | Accession                      |
|----------------------------------------------------------------------------------------------------------------------------|-----------|-------------|-------------|---------|-------|--------------------------------|
| <input type="checkbox"/> <a href="#">hypothetical protein GUITHDRAFT_162236 [Guillardia theta CCMP2712]</a>                | 87.8      | 129         | 95%         | 7e-17   | 36%   | <a href="#">XP_005836053.1</a> |
| <input type="checkbox"/> <a href="#">hypothetical protein BCR39DRAFT_591213 [Naematelia encephala]</a>                     | 83.6      | 269         | 99%         | 4e-15   | 44%   | <a href="#">ORY22767.1</a>     |
| <input type="checkbox"/> <a href="#">hypothetical protein C367_01045 [Cryptococcus neoformans var. grubii Ze90-1]</a>      | 74.3      | 203         | 99%         | 6e-12   | 44%   | <a href="#">OXG32277.1</a>     |
| <input type="checkbox"/> <a href="#">hypothetical protein CNAG_03655 [Cryptococcus neoformans var. grubii H99]</a>         | 72.4      | 122         | 97%         | 2e-11   | 40%   | <a href="#">XP_012047367.1</a> |
| <input type="checkbox"/> <a href="#">hypothetical protein C361_01040 [Cryptococcus neoformans var. grubii Tu259-1]</a>     | 72.4      | 162         | 97%         | 2e-11   | 40%   | <a href="#">OXG27769.1</a>     |
| <input type="checkbox"/> <a href="#">hypothetical protein C353_01066 [Cryptococcus neoformans var. grubii AD1-83a]</a>     | 72.4      | 161         | 97%         | 2e-11   | 40%   | <a href="#">OWZ52057.1</a>     |
| <input type="checkbox"/> <a href="#">hypothetical protein C349_01145 [Cryptococcus neoformans var. grubii Br795]</a>       | 72.4      | 123         | 97%         | 3e-11   | 40%   | <a href="#">OXG88078.1</a>     |
| <input type="checkbox"/> <a href="#">hypothetical protein C350_01054 [Cryptococcus neoformans var. grubii MW-RSA36]</a>    | 72.0      | 121         | 97%         | 3e-11   | 40%   | <a href="#">OXG86558.1</a>     |
| <input type="checkbox"/> <a href="#">hypothetical protein J007_01050 [Cryptococcus neoformans var. grubii]</a>             | 72.0      | 206         | 99%         | 3e-11   | 39%   | <a href="#">OXB39147.1</a>     |
| <input type="checkbox"/> <a href="#">hypothetical protein C356_01056 [Cryptococcus neoformans var. grubii c45]</a>         | 72.0      | 207         | 100%        | 4e-11   | 39%   | <a href="#">OWZ59297.1</a>     |
| <input type="checkbox"/> <a href="#">hypothetical protein C347_01119 [Cryptococcus neoformans var. grubii AD2-60a]</a>     | 71.6      | 159         | 97%         | 4e-11   | 39%   | <a href="#">OWZ35382.1</a>     |
| <input type="checkbox"/> <a href="#">hypothetical protein AYX13_01638 [Cryptococcus neoformans var. grubii]</a>            | 71.6      | 200         | 99%         | 4e-11   | 39%   | <a href="#">OXC69871.1</a>     |
| <input type="checkbox"/> <a href="#">hypothetical protein C364_01035 [Cryptococcus neoformans var. grubii Bt63]</a>        | 71.6      | 251         | 99%         | 5e-11   | 38%   | <a href="#">OXM81172.1</a>     |
| <input type="checkbox"/> <a href="#">hypothetical protein C358_01047 [Cryptococcus neoformans var. grubii MW-RSA852]</a>   | 71.2      | 123         | 97%         | 5e-11   | 39%   | <a href="#">OXC64217.1</a>     |
| <input type="checkbox"/> <a href="#">hypothetical protein C366_01032 [Cryptococcus neoformans var. grubii Tu401-1]</a>     | 71.2      | 250         | 99%         | 5e-11   | 38%   | <a href="#">OXG22134.1</a>     |
| <input type="checkbox"/> <a href="#">hypothetical protein C365_01100 [Cryptococcus neoformans var. grubii Bt85]</a>        | 71.2      | 249         | 99%         | 5e-11   | 38%   | <a href="#">OWZ80149.1</a>     |
| <input type="checkbox"/> <a href="#">hypothetical protein C355_01116 [Cryptococcus neoformans var. grubii Th84]</a>        | 71.2      | 199         | 99%         | 6e-11   | 39%   | <a href="#">OXG53139.1</a>     |
| <input type="checkbox"/> <a href="#">hypothetical protein J000_01038 [Cryptococcus neoformans var. grubii]</a>             | 71.2      | 197         | 99%         | 6e-11   | 39%   | <a href="#">OXH74095.1</a>     |
| <input type="checkbox"/> <a href="#">hypothetical protein AYX14_03263 [Cryptococcus neoformans var. grubii]</a>            | 71.2      | 199         | 99%         | 6e-11   | 38%   | <a href="#">OWZ71333.1</a>     |
| <input type="checkbox"/> <a href="#">hypothetical protein H072_6521 [Dactylellina haptotyla CBS 200.50]</a>                | 70.9      | 272         | 99%         | 7e-11   | 38%   | <a href="#">EPS39696.1</a>     |
| <input type="checkbox"/> <a href="#">hypothetical protein AYX15_04466 [Cryptococcus neoformans var. grubii]</a>            | 70.5      | 198         | 99%         | 1e-10   | 38%   | <a href="#">OWZ63593.1</a>     |
| <input type="checkbox"/> <a href="#">hypothetical protein C362_00532 [Cryptococcus neoformans var. grubii Bt1]</a>         | 70.5      | 120         | 99%         | 1e-10   | 39%   | <a href="#">OWT42160.1</a>     |
| <input type="checkbox"/> <a href="#">hypothetical protein J008_01035 [Cryptococcus neoformans var. grubii]</a>             | 70.5      | 197         | 99%         | 1e-10   | 39%   | <a href="#">OXH40688.1</a>     |
| <input type="checkbox"/> <a href="#">hypothetical protein CALVIDRAFT_558348 [Calocera viscosa TUFC12733]</a>               | 67.8      | 169         | 99%         | 9e-10   | 43%   | <a href="#">KZO91079.1</a>     |
| <input type="checkbox"/> <a href="#">PREDICTED: titin isoform X2 [Zeugodacus cucurbitae]</a>                               | 67.0      | 186         | 100%        | 2e-09   | 36%   | <a href="#">XP_011189876.1</a> |
| <input type="checkbox"/> <a href="#">PREDICTED: titin isoform X1 [Zeugodacus cucurbitae]</a>                               | 67.0      | 186         | 100%        | 2e-09   | 36%   | <a href="#">XP_011189875.1</a> |
| <input type="checkbox"/> <a href="#">hypothetical protein CALCODRAFT_505507 [Calocera cornea HHB12733]</a>                 | 66.2      | 243         | 97%         | 3e-09   | 44%   | <a href="#">KZT62434.1</a>     |
| <input type="checkbox"/> <a href="#">hypothetical protein I352_05180, partial [Cryptococcus gattii VGII MMRL2647]</a>      | 65.5      | 161         | 97%         | 6e-09   | 40%   | <a href="#">KIR32353.1</a>     |
| <input type="checkbox"/> <a href="#">uncharacterized protein LOC111508187 [Leptinotarsa decemlineata]</a>                  | 65.1      | 126         | 99%         | 9e-09   | 37%   | <a href="#">XP_023019384.1</a> |
| <input type="checkbox"/> <a href="#">hypothetical protein PPERSA_02566 [Pseudocohnilembus persalinus]</a>                  | 64.7      | 511         | 99%         | 1e-08   | 36%   | <a href="#">KRX09694.1</a>     |
| <input type="checkbox"/> <a href="#">PREDICTED: skin secretory protein xP2-like [Diaphorina citri]</a>                     | 64.3      | 164         | 98%         | 1e-08   | 38%   | <a href="#">XP_017299517.1</a> |
| <input type="checkbox"/> <a href="#">hypothetical protein I313_06003 [Cryptococcus gattii VGII Ram5]</a>                   | 64.3      | 149         | 99%         | 1e-08   | 40%   | <a href="#">KIR38008.1</a>     |
| <input type="checkbox"/> <a href="#">hypothetical protein CNBB4170 [Cryptococcus neoformans var. neoformans B-3501A]</a>   | 63.5      | 203         | 99%         | 3e-08   | 41%   | <a href="#">XP_777186.1</a>    |
| <input type="checkbox"/> <a href="#">tubulin binding protein, putative [Cryptococcus neoformans var. neoformans JEC21]</a> | 63.5      | 203         | 99%         | 3e-08   | 41%   | <a href="#">XP_024512134.1</a> |
| <input type="checkbox"/> <a href="#">hypothetical protein L198_02309 [Tsuchiyaea wingfieldii CBS 7118]</a>                 | 63.2      | 206         | 99%         | 3e-08   | 40%   | <a href="#">XP_019033513.1</a> |
| <input type="checkbox"/> <a href="#">hypothetical protein CNBG_0058 [Cryptococcus gattii VGII R265]</a>                    | 63.2      | 63.2        | 97%         | 4e-08   | 39%   | <a href="#">KGB74220.2</a>     |
| <input type="checkbox"/> <a href="#">artoculin [Caulobacter sp. Root656]</a>                                               | 62.4      | 110         | 100%        | 4e-08   | 40%   | <a href="#">KRA75086.1</a>     |
| <input type="checkbox"/> <a href="#">conserved hypothetical protein [Culex quinquefasciatus]</a>                           | 62.8      | 102         | 84%         | 5e-08   | 39%   | <a href="#">XP_001866136.1</a> |
| <input type="checkbox"/> <a href="#">hypothetical protein I309_06410, partial [Cryptococcus gattii VGII LA55]</a>          | 62.8      | 122         | 99%         | 5e-08   | 40%   | <a href="#">KIR24750.1</a>     |
| <input type="checkbox"/> <a href="#">hypothetical protein FF38_10240 [Lucilia cuprina]</a>                                 | 62.4      | 167         | 97%         | 6e-08   | 40%   | <a href="#">KNC31755.1</a>     |
| <input type="checkbox"/> <a href="#">titin-like [Lucilia cuprina]</a>                                                      | 62.4      | 167         | 97%         | 6e-08   | 40%   | <a href="#">XP_023293383.1</a> |
| <input type="checkbox"/> <a href="#">hypothetical protein CC85DRAFT_93486 [Cutaneotrichosporon oleaginosum]</a>            | 62.4      | 361         | 100%        | 7e-08   | 44%   | <a href="#">XP_018278880.1</a> |
| <input type="checkbox"/> <a href="#">hypothetical protein I310_01652 [Cryptococcus gattii VGII CA1014]</a>                 | 62.0      | 182         | 99%         | 8e-08   | 40%   | <a href="#">KIR74055.1</a>     |
| <input type="checkbox"/> <a href="#">hypothetical protein RHOSPDRAFT_37112 [Rhodotorula sp. JG-1b]</a>                     | 61.2      | 166         | 98%         | 1e-07   | 45%   | <a href="#">KWU41351.1</a>     |
| <input type="checkbox"/> <a href="#">hypothetical protein [Caulobacter sp. Root1472]</a>                                   | 60.5      | 108         | 100%        | 2e-07   | 38%   | <a href="#">WP_056752882.1</a> |
| <input type="checkbox"/> <a href="#">hypothetical protein GUITHDRAFT_117614 [Guillardia theta CCMP2712]</a>                | 60.8      | 221         | 98%         | 2e-07   | 35%   | <a href="#">XP_005823239.1</a> |
| <input type="checkbox"/> <a href="#">hypothetical protein I304_02100 [Cryptococcus gattii VGII CBS 10090]</a>              | 60.1      | 158         | 97%         | 4e-07   | 42%   | <a href="#">KIR94458.1</a>     |
| <input type="checkbox"/> <a href="#">hypothetical protein I308_05094 [Cryptococcus gattii VGIV IND107]</a>                 | 59.7      | 99.4        | 97%         | 6e-07   | 38%   | <a href="#">KIR84507.1</a>     |



|                                                                                                                                 |      |      |      |       |     |                                |
|---------------------------------------------------------------------------------------------------------------------------------|------|------|------|-------|-----|--------------------------------|
| <input type="checkbox"/> <a href="#">hypothetical protein I304_02100 [Cryptococcus gattii VGII CBS 10090]</a>                   | 60.1 | 158  | 97%  | 4e-07 | 42% | <a href="#">KIR94458.1</a>     |
| <input type="checkbox"/> <a href="#">hypothetical protein I308_05094 [Cryptococcus gattii VGIV IND107]</a>                      | 59.7 | 99.4 | 97%  | 6e-07 | 38% | <a href="#">KIR84507.1</a>     |
| <input type="checkbox"/> <a href="#">PREDICTED: titin [Stomoxys calcitrans]</a>                                                 | 59.3 | 113  | 81%  | 6e-07 | 42% | <a href="#">XP_013098347.1</a> |
| <input type="checkbox"/> <a href="#">cytoskeletal protein [Euglena gracilis]</a>                                                | 58.9 | 204  | 85%  | 8e-07 | 38% | <a href="#">CAA78363.1</a>     |
| <input type="checkbox"/> <a href="#">hypothetical protein AOL_s00078g398 [Arthrotrrys oligospora ATCC 24927]</a>                | 59.3 | 117  | 97%  | 8e-07 | 40% | <a href="#">XP_011121963.1</a> |
| <input type="checkbox"/> <a href="#">PREDICTED: titin [Rhagoletis zephyria]</a>                                                 | 58.9 | 105  | 80%  | 9e-07 | 38% | <a href="#">XP_017485291.1</a> |
| <input type="checkbox"/> <a href="#">titin [Ceratitis capitata]</a>                                                             | 58.9 | 150  | 90%  | 9e-07 | 36% | <a href="#">XP_012155257.1</a> |
| <input type="checkbox"/> <a href="#">hypothetical protein L804_05855, partial [Cryptococcus gattii VGII 2001/935-1]</a>         | 58.9 | 160  | 99%  | 1e-06 | 39% | <a href="#">KIR96757.1</a>     |
| <input type="checkbox"/> <a href="#">Tubulin binding protein, putative [Cryptococcus gattii WM276]</a>                          | 58.5 | 256  | 97%  | 1e-06 | 36% | <a href="#">XP_003192384.1</a> |
| <input type="checkbox"/> <a href="#">80 kda articularin=major membrane skeletal protein [Euglena gracilis, Peptide, 651 aa]</a> | 58.2 | 249  | 87%  | 1e-06 | 38% | <a href="#">AAB23240.1</a>     |
| <input type="checkbox"/> <a href="#">hypothetical protein [Nocardia sp. BMG111209]</a>                                          | 58.2 | 139  | 99%  | 1e-06 | 38% | <a href="#">WP_019925771.1</a> |
| <input type="checkbox"/> <a href="#">hypothetical protein BGN86_01150 [Caulobacteriales bacterium 68-7]</a>                     | 58.2 | 115  | 95%  | 1e-06 | 43% | <a href="#">OJU12606.1</a>     |
| <input type="checkbox"/> <a href="#">PREDICTED: titin [Bactrocera latifrons]</a>                                                | 56.6 | 98.6 | 84%  | 5e-06 | 37% | <a href="#">XP_018783252.1</a> |
| <input type="checkbox"/> <a href="#">hypothetical protein CONPUDRAFT_167623 [Coniophora puteana RWD-64-598 SS2]</a>             | 56.6 | 56.6 | 93%  | 6e-06 | 42% | <a href="#">XP_007771658.1</a> |
| <input type="checkbox"/> <a href="#">titin isoform X1 [Aedes aegypti]</a>                                                       | 55.5 | 55.5 | 76%  | 1e-05 | 39% | <a href="#">XP_001659466.2</a> |
| <input type="checkbox"/> <a href="#">AAEL008752-PA [Aedes aegypti]</a>                                                          | 55.5 | 55.5 | 76%  | 1e-05 | 39% | <a href="#">EAT39445.1</a>     |
| <input type="checkbox"/> <a href="#">titin isoform X2 [Aedes aegypti]</a>                                                       | 55.5 | 55.5 | 76%  | 2e-05 | 39% | <a href="#">XP_021708219.1</a> |
| <input type="checkbox"/> <a href="#">hypothetical protein PPERSA_12380 [Pseudocohnilembus persalinus]</a>                       | 55.1 | 258  | 99%  | 2e-05 | 37% | <a href="#">KRW98423.1</a>     |
| <input type="checkbox"/> <a href="#">articularin [Caulobacter sp. UNC279MFTsu5.1]</a>                                           | 54.3 | 138  | 99%  | 3e-05 | 43% | <a href="#">WP_089929575.1</a> |
| <input type="checkbox"/> <a href="#">hypothetical protein SAMN02799626_03325 [Caulobacter sp. UNC279MFTsu5.1]</a>               | 53.9 | 137  | 100% | 3e-05 | 42% | <a href="#">SFK07116.1</a>     |
| <input type="checkbox"/> <a href="#">hypothetical protein [Gordonia sihwensis]</a>                                              | 54.3 | 96.7 | 99%  | 4e-05 | 37% | <a href="#">WP_045537586.1</a> |
| <input type="checkbox"/> <a href="#">hypothetical protein RP20_CCG005438 [Aedes albopictus]</a>                                 | 53.9 | 53.9 | 76%  | 5e-05 | 36% | <a href="#">KXJ78170.1</a>     |
| <input type="checkbox"/> <a href="#">uncharacterized protein LOC111002932 [Pieris rapae]</a>                                    | 53.5 | 94.0 | 79%  | 6e-05 | 42% | <a href="#">XP_022128914.1</a> |
| <input type="checkbox"/> <a href="#">PREDICTED: titin [Bactrocera oleae]</a>                                                    | 53.5 | 96.7 | 90%  | 7e-05 | 38% | <a href="#">XP_014088400.1</a> |
| <input type="checkbox"/> <a href="#">PREDICTED: titin-like isoform X2 [Aedes albopictus]</a>                                    | 53.5 | 53.5 | 76%  | 7e-05 | 35% | <a href="#">XP_019544309.1</a> |

*Cryptococcus neoformans* (basidiomycete)  
tubulin binding protein XP\_568826.1  
(First half of sequence)

MGSP LPRQRSRANLKHALPAPPSTRSLASMAGNSPTSSPTPQRRSEITADAL  
RSHLSSLLLEQSSQLQMLGTMGQEILRQQQLEERIRDFEGEGIEGDAIAEET  
KEKLRELDEAMKAWENQNEDEMMRELGGKHRQLDMEFATEIGQNLLVEVRRL  
QALLSERDRALEKLSEEKETWEQESQTLIIAVRAAESSVDRYKEENWNLEVN  
LQELRSSVADMQDQLTKANAEQARLQKTLVSSREAAEAYKTEAEKHAQAIIE  
LKAKHETDMAQARRTTAGLQRDKSDLLGELNHERQRRVSARGRMSQSLSAS  
PGMLSPNHLDSDEDDVFAAGGKGNSSPTKRGPGFDANDNALSPSQLYESDF  
DSPNPTPSKPFPRSP LGEMFVSENDELREKL RVAEQEIEALKSENERVRLGSF  
SKKESV VDEFGTRAPAGEWEEDEHTIGASSRGRGSTRGRRGGRGKNFAASI  
GRKFGFNRAVSGLSTPNAGDRSFNSTSSGTPDLLRPRDMSASPAPSVIGGET  
LGNVLGNRSVERLGSASPFNTPSIDSLKANFGQPTALADEIGAPIEPSTDYVDA  
GIMTDKWSPEKPIMPQTQSPAVIPSPTTPTELIASWGAETPKRGVRDESQFAN  
LPPLPPPPATPTAAGDTPKNTPLPMP SRLQQVFAPISIDDSMSITTDTDAD  
DYESAAETIGSLTPNRTQSELPTDTEAYQTGREWPNESSAEDSDTEEVQEQE  
HTLRGLKASSTIGLGLASAAAGGWAAAKQAHKMASRDR I ADAPV

EKIV  
EKIVEV  
EKRIEVPV  
DRIVEV  
EKRVEVPV  
DRIVEV  
EKII  
EKIVEVPV  
ERIIEV  
EKIVEIPV  
EKIVEV  
EKIVEV  
EKRIEVPV  
DRIIEV  
EKRVEVPV  
DRIVEV  
EKII  
EKIVEVPV  
EKIIEV  
EKIV  
EKIVEVPV  
DRIVEVPV  
EKIIEV  
EKLVEVPVEV  
EKIV  
EKIV  
EKIIEVPVEV  
EKIVEVPV  
EKIVEV  
EKRVEVPVEV  
EKIVEVPVEV  
EKII  
EKIVEVPI  
DKIIEI  
EKRVEVPVEI  
EKIVEVPVETIV  
EKIVEV  
EKIV  
EKTVEVPV  
EKIIEV

*Cryptococcus neoformans* (basidiomycete)  
tubulin binding protein XP\_568826.1  
(Second half of sequence)

Predicted secondary structure next slide

EKIVEVPV  
EKIIEV  
EKIV  
EKIVEVPV  
EKIIEV  
EKIVEVPKIIIEV  
EKVV  
EKIVEV  
EKEVI  
KEVEV  
EKIV  
EKIVEVEV  
KEVPVNVDV  
  
EKIV  
ERVVEV  
EKPV  
EKIIEVPKIVEV  
EKIV  
EKVIEVI  
KEVP  
KEIEII  
KEVEV  
EKIVEVI  
KEVEV  
EKIVEVI  
KEVEV  
EKVV  
ERIVEVPVEV  
EKIVEVEV  
EKRVEVPFEV  
EKIVEV  
EKVVEVLVEV  
EKRVEVPVEV  
EKIV  
EKTIEVPMEV  
EKIV  
EKIVEVPVEI  
EKRIEVPVEV  
EKIVQIPVEV  
EKIV  
EKMVEVPVEV  
EKIV  
EKVVEVPIEI  
ERIVEVQKIVEVPVEV  
EKIV  
ERIVELPVEVQRRIEVPV  
EKIVEV  
ERIVEV  
EKIVEVLV  
EKIVEVPV  
ERVV  
ERQVEVPVEI  
ERII  
ERRVEVPI  
EKIVTI

*Cryptococcus neoformans* (basidiomycete)  
tubulin binding protein XP\_568826.1

Predicted secondary structure

```

1  M G S P L P R Q R S R A N L K H A L P A P P S T R S L A S M A G N S P T S S P T P Q R R S E I T A D
51  A L R S H L S S L L E Q K S S Q L Q M L G T M G Q E I L R Q Q Q E L E E R I R D F E G E G I E G D A
101 I A E E T K E K L R E L D E A M K A W E N Q N E D M M R E L G G K H R Q L D M E F A T E I G Q N L L
151 V E V R R L Q A L L S E R D R A L E K L S E E K E T W E Q E S Q T L L I A V R A A E S S V D R Y K E
201 E N W N L E V N L Q E L R S S V A D M Q D Q L T K A N A E Q A R L Q K T L V S S R E A A E A Y K T E
251 A E K H A Q A I E E L K A K H E T D M A Q A R R T T A G L Q R D K S D L L G E L N H E R Q R R V S A
301 R G R M S Q S L S A S P G M L S P N H L D S D E D D V F A A G G K G N S S P T K R G P G F D A N D N
351 A L S P S Q L Y E S D F D S P N P T P S K P F P R S P L G E M F V S E N D E L R E K L R V A E Q E I
401 E A L K S E N E R V R L G S F S K K E S V V D E F G T R A P A G E W E E D E H T I G A S S R G R G S
451 T R G R R G G R G K N F A A S I G R K F G F N R A V S G L S T P N A G D R S F N S T S S G T P D L L
501 R P R D M S A S P A P S V I G G E T L G N V L G N R S V E R L G S A S P F N T P S I D S L K A N F G
551 Q P T A L A D E I G A P I E P S E T D Y V D A G I M T D K W S P E K P I M P G T Q S P A V I P S P T T
601 P T E L I A S W G A E T P K R G

```

```

1  V R D E S Q F A N L P P L P P P P A T P T A A G D T T P T K K N T P L P M P S R L Q Q V F A P I S I
51  D D S M S I T T D T D A D D Y E S A A E T I G S S L T P N R T Q S E L P T D T E A Y Q T G R E W P N E
101 S S A E D S D A T E E V Q E Q E H T L R G L K A S S T I G L G L A S A A A G G W A A A K Q A H K M A S
151 R D R I A D A P V E K I V E V E K R I E V P V D R I V E V E K R V E V P V D R I V E V E K I
201 I E K I V E V P V E R I I E V E K I V E I P V E K I V E V E K I V E V E K R I E V P V D R I I E V E
251 K R V E V P V D R I V E V E K I I E K I V E V P V E K I I E V E K I V E K I V E V P V D R I V E V P
301 V E K I I E V E K L V E V P V E V E K I V E K I V E K I I E V P V E V E K I V E V P V E K I V E V E
351 K R V E V P V E V E K I V E V P V E V E K I I E K I V E V P I D K I I E I E K R V E V P V E I E K I
401 V E V P V E T I V E K I V E V E K I V E K T V E V P V E K I I E V E K I V E V P V E K I I E V E K I
451 V E K I V E V P V E K I I E V E K I V E V P K I I E V E K V V E K I V E V E K E V I K E V E V E K I
501 V E K I V E V E V V K E V P V N V D V E K I V E R V V E V E K P V E K I I E V P K I V E V E K I V E
551 K V I E V I K E V P K E I E I I K E V E V E K I V E V I K E V E V E K I V E V I K E V E V E K V V E
601 R I V E V P V E V E K I V E V E V E K R V E V P F E V E K I V E V E K V V E V L V E V E K R V E V P
651 V E V E K I V E K T I E V P M E V E K I V E K I V E V P V E I E K R I E V P V E V E K I V Q I P V E
701 V E K I V E K M V E V P V E V E K I V E K V V E V P I E R I E R I V E V Q K I V E V P V E V E K I V E
751 R I V E L P V E V Q R R I E V P V E K I V E V E R I V E V E K I V E V L V E K I V E V P V E R V E
801 R Q V E V P V E I E R I I E R R V E V P I E K I V T I E K R I E I P I E R I V T V E K I V E V P V A
851 A N K S L F S D S T S Q T E P L A S V N S S S L A P N P D I G L F R V T P G T S Y D F L K A P P S T
901 V R R V S A D N L A A V A S G S A D S T K T V E T K S V P T S P A D K S Q P P M M N L P P P P S N P
951 P P S R I G K K M S M G P P P L P T S P H P D D F L Q R A T S P A F Q S T V N R R S S T R T A P S A

```

```

1  G A A I R A S G G D M P P P A S T S R K P S R S S F K P A A S A Q A T P V R D D V K S R Q S V R R R
51  T D N T F A S S G Y T S A N S S A T G H D Q L I E H D R N P S L S S F D S Y A G T V P K P R G V P T
101 A G S T D P Q T I H A I T Q T M I G E Y L Y K Y T R R A V G K G Q S S N R H K R F F W V H P Y T K T
151 L Y W S T E D P G S S R A S E S S A K S V F I S N V K V I E D T N I Q P P G L F T K S I V V S T P G
201 R E I Q I T A P T Q E R H E L W M S A L Q F L L Q K Q S P E A N N T L A E S T T V R N S S S R P A L A S
251 I A D E Q G R L T M P K S P L S L R S F G S E R H S L S N I T P K A N R S H S T M S N Y P R S A S T
301 M G K R A G T V A H E Y T R R H E V P Q P F H G G H R Y K G P Y K G A P I V D D E F D V V S R E D G
351 E D M D T S F E G L E N V R A C C D G K H L V G Q H N H H H D H P N V P R T P A R A E T P S L R G W
401 S M R S G R A S N V L S D G E S I F S T A K K R E E R S K S A M G H R D R R D G A K S P A M G S L R
451 N L K Q A

```

21

# *Kockovaella imperatae* (basidiomycete) XP\_021873516.1 (First half of sequence)

MDDPFGSPTTSTLPRQRSRPNLAAHLPAPPSSRSLASQLRDSPTKPSQKLEY  
TGHALHQHLSSLLEQKTAQLQMLGTMGQEILKQQQELEERIKGFDEDDGIDEE  
VGEDTKVKLKDLDDEAMRQWEAQNEDMMRELGGKMPDSLEGLDLKAPVMEN  
GTTASAMNRRQRNAQHRALDMEFATEIGQNLLAEVRRRLQSLNEREKSVEKL  
NEEKDSWEVEKASLVGAVRNAESSVDRYKEENWNLEVNQLQELRAAHSDAQE  
QLTKSNIEHTRLNRSILSVRELAEMHKTDAEKNAQLLEDLKAKHETDMAQARKN  
YAGLQRDKSDLLTELHVERNRRVVSALRGRMSRGASASPGLSTPGGADESFE  
DEDVFAATVDDARKRSLAAENNALSPGNITAFSSSPDPTPSKDRVPLSDVYINE  
IDELRENLERARAEIATLKGEQHKARRMASREDITPRTSGDWEEEDSILGRGRG  
TVRGRRGRGRGFAASLSRKLGFSRVPSSLSNGSTPNDKSFNSTSTGTPDLLRY  
RESVSPGLDSPSLASRALSSSETSLDRPTSFMGPSTALADELGSGNLDSMDYAS  
GSNATDWSPEKQPQAYLENQVEVTTPTKGVFAESTKSNIEESTQPTGERTPTK  
PAKALPIAVISRRPSSVADTTTGDGETDYADAESTMDVATPREGTAEELPTDADES  
SYATGREYATAESS AGSDSDEGDYDQRLGISGSMGLGGA<sup>AAAA</sup>AAGGYAAYKQ  
AHKVASRDLI

- REKIV
- ERIVEVPV
- EKIVEV
- EKRVEVPVEVI
- KEVMV
- EKPIEVI
- KEVFN
- DRPVEVI
- KEVII
- DRPVEVI
- KEVIV
- EKPVEVI
- KEVLS
- EKPIEVI
- KEIIV
- DRPVEVI
- KEVIV
- EKPVEVI
- KEVIV
- DRPVEVI
- KEVIV
- EKLVEVI
- KEVIV
- DRPVEVI
- KEVVV
- EKPIEVI
- KEVIV
- DRHVEVI
- KEVPV
- DRPVEII
- KEVII
- DRPVEVI
- KEVIV
- DRPVEII
- KELVV
- EKSVEVI
- KEV
- EKPVEVI
- KEV
- EKIIEVPKIVEV

*Kockovaella imperatae* (basidiomycete)  
XP\_021873516.1(Second half of sequence)

22

Predicted secondary structure next slide.

EKIV  
ERIV  
EKEVEVPKIVEV  
EKII  
EKIVNV  
DREV  
EKPV  
ERIVEIPKIVEV  
EKIV  
EKIV  
EKPVEVFKQVEV  
EKIVEV  
ERIV  
EKPVEVI  
REV  
EKIVEVQV  
DRVVEVPV  
EKIV  
EKIVEVPVEV  
KEV  
EKIVEVPVEVI  
KEV  
EKIVELPVEVI  
REVIKTIEVPVEVLKTVEIPVEVI  
KEVSKTVEVPIEVVRIVEVI  
KEV  
EKIVEVPVEVIKTVEVPV  
DRIV  
EKIV  
EKRVEVPV  
EKIVP

MPSPTPSSPTVSPDLGIWRVQPGANYDFLKAPPPSGSLGGKTRASTETSALG  
LGFPADDGLPATRGLSPALTVDGLPPASPSASVDRTLPTMSLPPPPTIPPP  
AEQKKTSTGPPRRPLSPPPDEFVSRTARRASRPVVTGAMGPPESVIRKPS  
RTSVRPPPSPAASAFETRRTGHRGTLPASGQSSFSMRNDNGSISSMGSSVVP  
GEHKRSGSVVAGTTDPATIHAIQTMIQEYLWKYTRRALGKGQSENHRKRF  
WIHPYTKTLYWSASDPGSLGAQESSAKSVVITNVKAIDDANNSPGLHSQSI  
VVSTTGRDIQFTAESKDRHDLWMSALLFLLSESAPTGVANTLKHSSTVRAMS  
SRSLAADEQGRLTYTPTIPKSPMSMRSLSVNSFTMTPKAYPRPPSALSARA  
ASAMEKRSGTPAFEYRRHEVPATIHGGHRYKGTYKGAPFMEDFDVITAEDG  
DDPDASFEGMDNVRACCDGRHTVGHHPENESVTGPPERPAPRSVTPSLRA  
FSMRSRRASAASSKRPGIPKGFREEEPAVPKIDERSKSVTGH



*Kockovaella imperatae* (basidiomycete)

XP\_021873516.1

23

Predicted secondary structure

```
1 M D D P F G S P T T S T L P R Q R S R P N L A H H L P A P P S S R S L A S Q L R D S P T K P S Q K L
51 E Y T G H A L H Q H L S S L L E Q K T A Q L Q M L G T M G Q E I L K Q Q Q E L E E R I K G F D E D D
101 G I D E E V G E D T K V K L K D L D E A M R Q W E A Q N E D M M R E L G G K M P D S L E G L D L K A
151 P V M E N G T T S A S M N R R Q R N A Q H R A L D M E F A T E I G Q N L L A E V R R L Q S L L N E R
201 E K S V E K L N E E K D S W E V E K A S L V G A V R N A E S S V D R Y K E E N W N L E V N L Q E L R
251 A A H S D A Q E Q L T K S N I E H T R L N R S I L S V R E L A E M H K T D A E K N A Q L L E D L K A
301 K H E T D M A Q A R K N Y A G L Q R D K S D L L T E L H V E R N R R V S A L R G R M S R G A S A S P
351 G L S T P G G A D E S F E E D E D V F A A T V D D A R K R S L A A E N N A L S P G N I T A F S S S P
401 D P T P S K D R V P L S D V Y I N E I D E L R E N L E R A R A E I A T L K G E Q H K A R R M A S R E
451 D I T P R T S G D W E E E D S I L S G R G R G T V R G R R G R G R G F A A S L S R K L G F S R V P S
501 S L S N G S T P N D K S F N S T S T G T P D L L R Y R E S V S P G L D S P S L A S R A L S S E T S L
551 D R P T S F M G P S
1 T A L A D E L G S G N L D S M D Y A S G S N A T D W S P E K Q P Q A Y L E N Q V E V T T P T K G V F
51 A E S T K S N I E E S T Q P T G E R T P T K P A K A L P I A V I S R R P S S V A D T T T D G E T D Y
101 A D A E S T M D V A T P R E G T A E L P T D A D E S S Y A T G R E Y A T A E S S A G S D S D E G D Y
151 T Q R L G I S G S M L G L G G A A A A G G Y A A Y K Q A H K V A S R D L I R E K I V E R I V E V P
201 V E K I V E V E K R V E V P V E V I K E V M V E K P I E V I K E V F V D R P V E V I K E V I V E K P V E
251 V E V I K E V I V E K P V E V I K E V L S E K P I E V I K E I I V D R P V E V I K E V I V E K P V E
301 V I K E V I V D R P V E V I K E V I V E K L V E V I K E V I V D R P V E V I K E V V V E K P I E V I
351 K E V I V D R H V E V I K E V P V D R P V E I I K E V I I D R P V E V I K E V I V D R P V E I I K E
401 L V V E K S V E V I K E V E K P V E V I K E V E K I I E V P K I V E V E K I V E R I V E K E V E V P
451 K I V E V E K I I E K I V N V D R E V E K P V E R I V E I P K I V E V E K I V E K I V E K P V E V F
501 K Q V E V E K I V E V E R I V E K P V E V I R E V E K I V E V Q V D R V V E V P V E K I V E K I V E
551 V P V E V V K E V E K I V E V P V E V I K E V E K I V E L P V E V I R E V I K T I E V P V E V L K T
601 V E I P V E V I K E V S K T V E V P I E V V R I V E V I K E V E K I V E V P V E V I K T V E V P V D
651 R I V E K I V E K R V E V P V E K I V P M P S P T P S S P T V S P D L G I W R V Q P G A N Y D F L K
701 A P P P S G S L G G K T R A S T E T S A L G L G F P A D D G L P A T R G L S P A L T V D G L P P A S
751 P S A S V D R T L P P T M S L P P P P T I P P P A E Q K K T S T G P P P R P L S P P P D E F V S R T
801 A R R A S R P A V V T K G A M G P P E S V I R K P S R K P S V R P P S P A A S A F E T R R R G H R G
851 T L P A S G Q S S F S M R N D N G S I S S M G S V V P T G E H K R S G S V V A G T T D P A T I H A I
901 T Q T M I G E Y L W K Y T R R A L G K G Q S E N R H K R F F W I H P Y T K T L Y W S A S D P G S L G
951 A Q E S S A K S V V I T N V K A I D D A N N S P P G L H S Q S I V V S T T G R D I Q F T A E S K D R
1001 H D L W M S A L L F L L S E S A P T G V A N T L K H S S T V R A M S S R S L A A D E Q G R L T Y T P
1051 T I P K S P M S M R S L H S V N S F T M T P K A Y P R P P S A L S A R A A S A M E K R S G T P A F E
1101 Y Y R R H E V P A T I H G G H R Y K G T Y K G A P F M E D F D V I T A E D G D D P D A S F E G M D N
1151 V R A C C D G R H T V G H H H H P E N E S V T G P P E R P A P R S V T P S L R A F S M R S R R A S A
1201 A S S K R P G I P K G K F R E E E P A V P K I D E R S K S V T G H I
```

## Predicted secondary structure next slide

MDTQLSIQHRQHRLRLPLLLLLFFLCYFASSQAKRTTRRLPRDEVHEYAIHQY  
 NYAERDTQEPSGSVADLHADESKREVQARPPKGSRTTAGMTRDKRGAKKIRH  
 IVHLVNTAQQQKKKKPLTTNTRSNSHQHRQQNAVEDDSKSFHTYEETHEHIV  
 EPAQEQESAPKPAFASSPGHGAKLGLKSSTAHTQNEPLSQASTDNYATHAFL  
 KPPEEPHEEPMSSTEHHHEHEIQHEEEEEHHHVEKIKVKHHHHHHHHNHV

KEIIKKVPEPYPV  
 EKIVHVPV  
 EKIV  
 EKLHVPKYPYPV  
 EKII  
 EKKVPYPV  
 EKII  
 EKVV  
 EKKVPYPV  
 EKIV  
 EKIVHVPV  
 EKMVHVPQYPYPV  
 EKII  
 EKKVPYPV  
 EKII  
 EKVV  
 EKKVPYPV  
 EKIV  
 EKIVHVPV  
 EKIVHVPKYPYPV  
 EKII  
 EKKVPYPV  
 EKIV  
 EKVV  
 EKKVPYPV  
 EKIV  
 EKVVHVPKYPYPV  
 EKVI  
 EKIV  
 EKKIHVPV  
 EKIV  
 EKIIHIPKFPV  
 EKIV  
 EKVVHVPK

FPVIKHIPYPVEVKVPVHIEKVPYPVEKKVHVPYRVEVEKIPVPYKVEVEK  
 KVPIFIHTPHEHHEPYKFEHHEHEHKEEQHEQHEEKHDFEEHQHFEHHEHHHD  
 LSGYPTNQKANYARLQQQQPRHIANGAKAVLAKAHTPAAAAAIRAELLHQVQ  
 NFGYKITTSATPTDLEQSSDNKSQAMRLVPTPTANNFGFKQPTPAAPSDLES  
 SASENKPVVAHFEPSTLPPFRIHVDDGATSADGSSTLGAPSSSTNDMQAQASTHS  
 FRMLARLQPIALPVQVYQFHSIPFQQPLGFSLPALRAAVPSGGP



## Predicted secondary structure

1 M D T Q L S I Q H R Q H R L R L P L L L L F F L C Y F A S S Q A K R T T R R L P R D E V H E Y A I H  
 51 Q Y N Y A E R D T Q E P S G S V A D L H A D E S K R V E V Q A R P P K G S R T T A G M T R D K R G A  
 01 K K I R H I V H L V N T A Q Q Q K K K K P L T T N T R S N S H Q H R Q Q N A V E D D S K S F H T Y E  
 51 E T H E H I V E P A Q E Q E S A P K P A F A S S P G H G A K L G L K S S T A H T Q N E P L S Q A S T  
 01 D N Y A T H A F L K P P E E P H E E P E M S S T E H H E H E I Q H E E E E H H H V E K I K V K H H H  
 51 H H H H H N H V K E I I K K V P E P Y P V E K I V H V P V E K I V E K L V H V P K P Y P V E K I I E  
 01 K K V P Y P V E K I I E K V V E K K V P Y P V E K I V E K I V H V P V E K M V H V P Q P Y P V E K I  
 51 I E K K V P Y P V E K I I E K V V E K K V P Y P V E K I V E K I V H V P V E K I V H V P K P Y P V E  
 01 K I I E K K V P Y P V E K I V E K V V E K K V P Y P V E K I V E K V V H V P K P Y P V E K V I E K I  
 51 V E K K I H V P V E K I V E K I I H I P K P F P V E K I V E K V V H V P K P F P V I K H I P Y P V E  
 01 V K V P V H I E K P V P Y P V E K K V H V P Y R V E V E K K I P V P Y K V E V E K K V P I F I H T P  
 51 H E H H E P Y K F E H H E H E H K E E Q H E Q H E E K H D F E E H Q H F E H H E H H H D L S G Y P T  
 01 N Q K A N Y A R L Q Q Q Q P R H I A N G A K A V L A K A H T P A A A A I R A E L L H Q Q V Q N F G  
 51 Y K I T T S A T P T D L E Q S S S D N K S Q A M R L V P T P T A N N F G F K Q P T P A A P S D L E S  
 01 S A S E N K P V V A H F E P T S L P F R I H V D D G A T S A D G S S T L G A P S S T N D M Q A Q A S  
 51 T H S F R M L A R L Q P I A L P V Q V Y Q F H S I P F Q Q P L G F S L P A L R A A V P S G G P

# Zootermopsis nevadensis (termite)

## XP\_021932507.1

MKITIVLFLALAILATAENNQPGHKEAEKKEAAIKQTEEKKNDQQKTEESK  
 QTEQKQEVEQGDRKQEKRLIHDFYGVGFHGLDSGIFGGYDHTLHQEHVKT  
 ITLT

EKVPVPQPYPVHVPV  
 EKHVPYPV  
 EKPVPYPVKVPV  
 DRPYVPVTVHKVPYTVHKVPYAVKVPV  
 DKPYPVHVTV  
 EKKVPYPVEVKVPVPQPYTVHVPKPYTVIV  
 EKKVPAPYPVHVKVPVPQPYPVHVKVPVTVHV  
 DRPVPVEVKVPV  
 DRPIPVPV  
 EKPYPVPV  
 EKKVPYPV  
 EKPVPYPVKVPY  
 DRPIPVHVVKPYPVHV  
 EKKVPYPV  
 EKIVYPYPV  
 EKQVPYPVKVPY  
 DRPVPVHVDKPYVPV  
 EKEIPYPV  
 ERPVPYPVKVPV  
 EKEVPYPV  
 EKPVPYPVKVPV

AIPVHHEHGGIEYGGLEHGGFEQGGFGQGGFGHGGLEHGGFGEGFGHKK

|     |   |   |   |   |   |   |   |   |   |   |   |   |   |   |   |   |   |   |   |   |   |   |   |   |   |   |   |   |   |   |   |   |   |   |   |   |   |   |   |   |   |   |   |   |   |   |   |   |   |   |   |   |   |   |   |
|-----|---|---|---|---|---|---|---|---|---|---|---|---|---|---|---|---|---|---|---|---|---|---|---|---|---|---|---|---|---|---|---|---|---|---|---|---|---|---|---|---|---|---|---|---|---|---|---|---|---|---|---|---|---|---|---|
| 1   | M | K | I | T | I | V | V | L | F | L | A | L | A | I | L | A | T | A | E | N | N | Q | P | G | H | K | E | A | E | K | K | E | A | A | I | K | Q | T | E | E | K | K | N | D | Q | Q | K | T | E | E | S | K |   |   |   |
| 51  | S | K | Q | T | E | Q | K | Q | E | V | E | Q | G | D | R | K | Q | E | K | R | G | L | I | H | D | F | Y | G | V | G | F | G | H | G | L | D | S | G | I | F | G | G | Y | D | H | T | L | H | Q | E | S | K |   |   |   |
| 101 | H | V | K | T | I | T | L | T | E | K | V | P | V | P | Q | P | Y | P | V | H | V | P | V | E | K | H | V | P | Y | P | V | E | K | P | V | P | Y | P | V | K | V | P | V | D | R | P | Y | P | V | P | H | Q | E | S | K |
| 151 | V | T | V | H | K | P | V | P | Y | T | V | H | K | P | V | P | Y | A | V | K | V | P | V | D | K | P | Y | P | V | H | V | T | V | E | K | K | V | P | Y | P | V | E | V | K | V | P | V | P | Q | P | H | Q | E | S | K |
| 201 | Y | T | V | H | V | P | K | P | Y | T | V | I | V | E | K | K | V | P | A | P | Y | P | V | H | V | K | V | P | V | P | Q | P | Y | P | V | H | V | K | V | P | V | T | V | H | V | D | R | P | V | P | H | Q | E | S | K |
| 251 | V | E | V | K | V | P | V | D | R | P | I | P | V | P | V | E | K | P | Y | P | V | P | V | E | K | K | V | P | Y | P | V | E | K | P | V | P | Y | P | V | K | V | P | Y | D | R | P | I | P | V | H | Q | E | S | K |   |
| 301 | V | V | K | P | Y | P | V | H | V | E | K | K | V | P | Y | P | V | E | K | I | V | P | Y | P | V | E | K | Q | V | P | Y | P | V | K | V | P | Y | D | R | P | V | P | V | H | V | D | K | P | Y | P | H | Q | E | S | K |
| 351 | V | P | V | E | K | E | I | P | Y | P | V | E | R | P | V | P | Y | P | V | K | V | P | V | E | K | E | V | P | Y | P | V | E | K | P | V | P | Y | P | V | K | V | P | V | A | I | P | V | H | H | E | S | K |   |   |   |
| 401 | H | G | G | I | E | Y | G | G | L | E | H | G | G | F | E | Q | G | G | F | G | Q | G | G | F | G | H | G | G | L | E | H | G | G | F | G | E | G | F | G | H | H | K | H | H | E | S | K | H | H | E | S | K |   |   |   |
